# Supplementary material for: Reduction of Li+ within a borate anion
Source: Springer Nature journal article supplement (doi:10.1038/s41467-024-46948-8), 2024-03-22
Supplement: MOESM1 [file 41467_2024_46948_MOESM1_ESM.pdf]

## Supplementary Information

### Reduction of Li<sup>+</sup> within A Borate Anion

Haokun Li<sup>1</sup>, Jiachen Yao<sup>1</sup>, Gan Xu<sup>1</sup>, Shek-Man Yiu<sup>1</sup>, Chi-Kit Siu<sup>1</sup>, Zhen Wang<sup>1</sup>, Yung-Kang Peng<sup>1</sup>, Yi Xie<sup>2</sup>, Ying Wang<sup>2</sup>, and Zhenpin Lu<sup>1\*</sup>

<sup>1</sup> Department of Chemistry, State Key Laboratory of Marine Pollution, City University of Hong Kong, Kowloon Tong, Hong Kong SAR, P. R. China, E-mail: [zhenpilu@cityu.edu.hk](mailto:zhenpilu@cityu.edu.hk)

<sup>2</sup> Department of Chemistry, The Chinese University of Hong Kong, Shatin, Hong Kong SAR, P. R. China

## Table of Contents

|                                                                            |    |
|----------------------------------------------------------------------------|----|
| Table of Contents .....                                                    | 2  |
| General Information .....                                                  | 3  |
| Experimental Section .....                                                 | 4  |
| Gas Chromatography .....                                                   | 42 |
| Cyclic Voltammetry .....                                                   | 47 |
| EPR Spectroscopy .....                                                     | 48 |
| Powder XRD Analysis .....                                                  | 50 |
| X-ray photoelectron spectroscopy (XPS) .....                               | 51 |
| ICP-OES Study .....                                                        | 52 |
| Crystallographic Details .....                                             | 55 |
| Computational Details .....                                                | 56 |
| Reactions of Scheme 6-8 using naphthalene anion as reducing reagents ..... | 61 |
| References .....                                                           | 66 |

## General Information

All synthetic experiments and product purifications were conducted using glovebox (Ar) or Schlenk (N<sub>2</sub>) techniques (except for preparative thin layer chromatography, PTLC, and column chromatography). Chemicals were purchased from Sigma Aldrich, TCI, Aladdin, Macklin, or Bidepharm and used without further treatment. SPS-purified THF, toluene, and *n*-hexane were dried using 3 Å molecular sieves in the glovebox. Deuterated solvents (CDCl<sub>3</sub>, C<sub>6</sub>D<sub>6</sub>) were degassed by freeze-pump-thaw cycles and stored over 3 Å molecular sieves in the glovebox (THF-d<sub>8</sub> was dried using NaK before use, and deuterated solvents for air-stable products were used without further treatment). CO<sub>2</sub> (99.99%) was purchased from Linde Industrial Gases and dried with a combination of a P<sub>2</sub>O<sub>5</sub> drying column and 3 Å molecular sieves over one week. The nuclear magnetic resonance (NMR) spectroscopy was facilitated over a Bruker Avance series of spectrometers with frequencies of 300, 400, and 600 MHz. Chemical shifts (δ) are presented in ppm and set relative to the respective solvent's residual proton (<sup>1</sup>H) signal or the carbon nuclei (<sup>13</sup>C{<sup>1</sup>H}). [<sup>11</sup>B, <sup>119</sup>Sn{<sup>1</sup>H}, <sup>31</sup>P{<sup>1</sup>H}] NMR spectra were referenced to external standards, BF<sub>3</sub>·OEt<sub>2</sub>, SnMe<sub>4</sub> and 85% H<sub>3</sub>PO<sub>4</sub>, respectively. High-resolution mass spectra were recorded via a Sciex X500R Q-TOF mass spectrometer.

## Experimental Section

### Synthesis of (bipy)BPh (**4**):

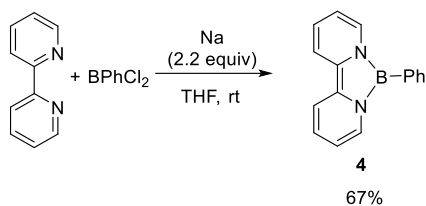

To a solution of 2,2'-Bipyridine (1075 mg, 6.89 mmol, 1.0 eq.) in THF (20 mL) was added  $\text{BPhCl}_2$  (1096 mg, 6.89 mmol, 1.0 eq.). The mixture was stirred at room temperature for 5 min. Then, sodium (348 mg, 15.13 mmol, 2.2 eq.) was added to the reaction mixture at room temperature, and the reaction was stirred at room temperature overnight. Afterward, all the volatile was removed under a high vacuum, and toluene (50 mL) was added to extract the target product. After filtration, the toluene phase was reduced under high vacuum, affording compound **4** as a red solid (1132 mg, 67%). Compound **4** was pure at this stage, and no further purification was needed.

**$^1\text{H}$  NMR** (400 MHz,  $\text{C}_6\text{D}_6$ , 298K):  $\delta$  [ppm] = 7.64 (d,  $J_{\text{H-H}} = 7.2$  Hz, 2H), 7.49 (d,  $J_{\text{H-H}} = 6.1$  Hz, 2H), 7.31-7.23 (m, 3H), 7.19 (d,  $J_{\text{H-H}} = 9.1$  Hz, 2H), 6.18 (dd,  $J_{\text{H-H}} = 9.3, 6.0$  Hz, 2H), 5.92 (t,  $J_{\text{H-H}} = 6.6$  Hz, 2H).

**$^{11}\text{B}$  NMR** (128 MHz,  $\text{C}_6\text{D}_6$ , 298K):  $\delta$  [ppm] = 21.56.

**$^{13}\text{C}\{^1\text{H}\}$  NMR** (100 MHz,  $\text{C}_6\text{D}_6$ , 298K):  $\delta$  [ppm] = 133.84, 129.33, 128.71, 127.25, 118.99, 118.55, 114.77, 110.93.

**HRMS** (m/z): Calc. For [**4**] ( $\text{C}_{16}\text{H}_{13}\text{BN}_2$ ): 244.1172 Found: 244.1169.

### Synthesis of [Li(THF)<sub>4</sub>][(bipy)BPh<sub>2</sub>] (**5**):

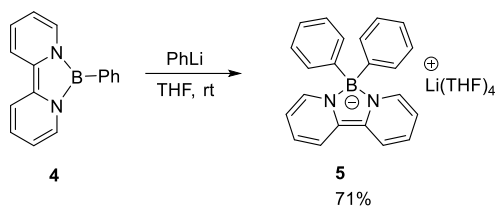

To a solution of [**4**] (300 mg, 1.23 mmol, 1.0 eq.) in THF (10 mL) was added PhLi (103 mg, 1.23 mmol, 1.0 eq.) at room temperature. The reaction mixture was stirred at room temperature overnight. Afterward, the mixture was filtered. The filtrate was collected and reduced under a high vacuum, affording **5** as a black solid (540 mg, 71%).

Single crystals suitable for X-ray crystal structure analysis were obtained from vapor diffusion of n-hexane to THF solution at room temperature.

<sup>1</sup>H NMR (400 MHz, THF-d<sub>8</sub>, 298K): δ [ppm] = 7.42 (d, *J*<sub>H-H</sub> = 7.3 Hz, 4H), 7.03 (t, *J*<sub>H-H</sub> = 7.3 Hz, 4H), 6.88 (t, *J*<sub>H-H</sub> = 7.3 Hz, 2H), 5.68 (d, *J*<sub>H-H</sub> = 6.7 Hz, 2H), 5.11 (d, *J*<sub>H-H</sub> = 9.4 Hz, 2H), 4.64 (dd, *J*<sub>H-H</sub> = 9.5, 5.3 Hz, 2H), 3.82 (t, *J*<sub>H-H</sub> = 6.1 Hz, 2H).

<sup>11</sup>B NMR (128 MHz, THF-d<sub>8</sub>, 298K): δ [ppm] = 2.79.

<sup>13</sup>C{<sup>1</sup>H} NMR (100 MHz, THF-d<sub>8</sub>, 298K): δ [ppm] = 140.43, 133.96, 126.66, 124.27, 119.68, 117.64, 116.24, 94.50.

HRMS (m/z): Calc. For [**5**-Li(THF)<sub>4</sub>] (C<sub>22</sub>H<sub>18</sub>BN<sub>2</sub>): 321.1563 Found: 321.1548

### Synthesis of [K(THF)<sub>2</sub>][(bipy)BPh<sub>2</sub>] (**5'**):

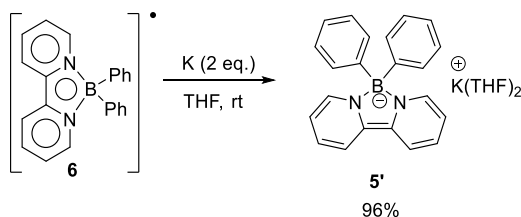

To a solution of [**6**] (367 mg, 1.14 mmol, 1.0 eq.) in THF (10 mL) was added potassium (89 mg, 2.28 mmol, 2.0 eq.) at room temperature. The reaction mixture was stirred at room temperature overnight. Afterward, the mixture was filtered. The filtrate was collected and reduced under a high vacuum, affording compound **5'** as a black solid (552 mg, 96%).

<sup>1</sup>H NMR (400 MHz, THF-d<sub>8</sub>, 298K): δ [ppm] = 7.42 (d, *J*<sub>H-H</sub> = 7.2 Hz, 4H), 7.09 (t, *J*<sub>H-H</sub> = 7.3 Hz, 4H), 6.95 (t, *J*<sub>H-H</sub> = 7.3 Hz, 2H), 5.70 (d, *J*<sub>H-H</sub> = 6.8 Hz, 2H), 5.20 (d, *J*<sub>H-H</sub> = 9.5 Hz, 2H), 4.73 (dd, *J*<sub>H-H</sub> = 9.5, 5.3 Hz, 2H), 3.93 (t, *J*<sub>H-H</sub> = 6.1 Hz, 2H).

<sup>11</sup>B NMR (128 MHz, THF-d<sub>8</sub>, 298K): δ [ppm] = 2.73.

<sup>13</sup>C{<sup>1</sup>H} NMR (100 MHz, THF-d<sub>8</sub>, 298K): δ [ppm] = 139.66, 133.32, 126.97, 124.75, 118.84, 117.29, 116.54, 95.25.

HRMS (m/z): Calc. For [**5'**-K(THF)<sub>2</sub>] (C<sub>22</sub>H<sub>18</sub>BN<sub>2</sub>): 321.1563 Found: 321.1555.

# **Synthesis of [(bipy)BPh<sub>2</sub>] (6):**

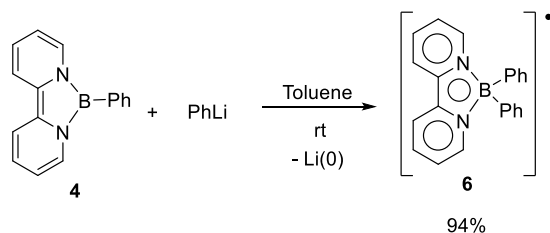

**From 4:** To a solution of [**4**] (210 mg, 0.86 mmol, 1.0 eq.) in toluene (10 mL) was added PhLi (108 mg, 1.29 mmol, 1.5 eq.) at room temperature. The reaction mixture was stirred at room temperature overnight. Afterward, the mixture was filtered. The filtrate was collected and reduced under a high vacuum, affording compound **6** as a deep green solid (260 mg, 94%).

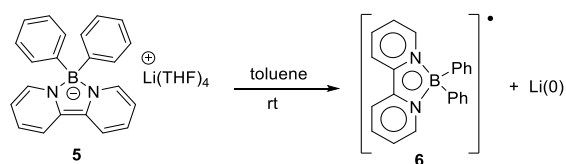

**From 5:** Toluene (10mL) was added to [**5**] (255 mg, 0.41 mmol) in the glovebox and stirred at room temperature overnight. Afterward, the mixture was filtered. The filtrate was collected and reduced under a high vacuum, affording compound **6** as deep green powder. (113 mg, 85%)

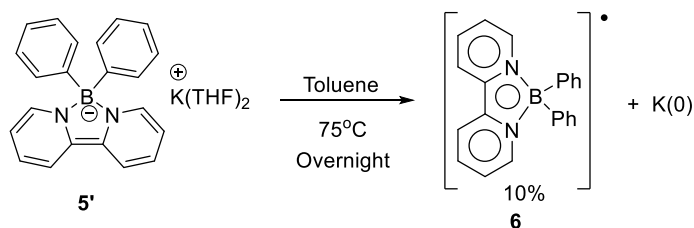

**From 5':** Compound (**5'**) (35 mg, 0.070 mmol) was suspended in toluene (10 mL) at room temperature. The mixture was heated without stirring at 75°C overnight. The color of the toluene solution turned dark green. After filtration, the toluene solution was collected, and all the volatile was removed under a high vacuum, affording compound **6** (2.3 mg, 10%).

Single crystals suitable for X-ray crystal structure analysis were obtained from the slow evaporation of a toluene solution at room temperature or recrystallization at -35°C in THF.

**<sup>1</sup>H NMR** (400 MHz, C<sub>6</sub>D<sub>6</sub>, 298K): silence.

**<sup>11</sup>B NMR** (128 MHz, C<sub>6</sub>D<sub>6</sub>, 298K): silence.

**g-factor** (toluene, 298K): 2.0036

**HRMS** (m/z): Calc. For [**6**] (C<sub>22</sub>H<sub>18</sub>BN<sub>2</sub>): 321.1563 Found: 321.1552.

**Control Experiment:**

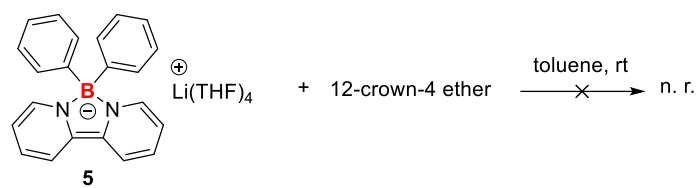

12-crown-4 ether (6 mg, 0.035 mmol, 2.2 eq.) was solved in toluene (1 mL) and added to **[5]** (10 mg, 0.016 mmol) in a J. Young's tube. The solution was slightly red, and many black powders remained insoluble. The solution was EPR silence. (Supplementary Figure38)

**Synthesis of [(bipy)BPh<sub>2</sub>][CuCl<sub>2</sub>] (**7**):**

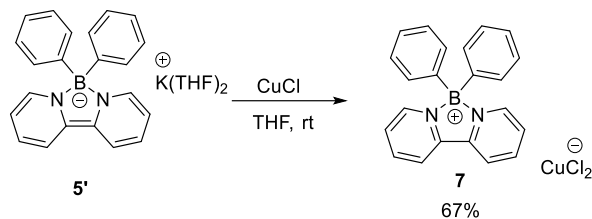

**From 5':** To THF solution (10 mL) of [**5'**] (297 mg, 0.59 mmol, 1.0 eq.) was added CuCl (175 mg, 1.77 mmol, 3.0eq.). The reaction mixture was stirred at room temperature overnight. Afterward, the solution was concentrated to about 2 mL, and n-hexane (5 mL) was added. Red solids precipitated after storage at -35°C overnight. After filtration, the solids were dried over high vacuum, affording compound **7** (180 mg, 67%).

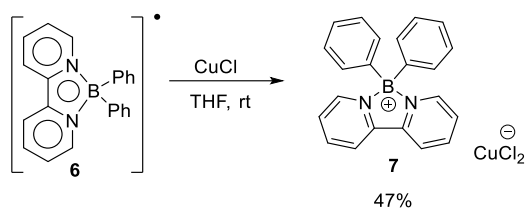

**From 6:** To THF solution (4 mL) of [**6**] (50 mg, 0.15 mmol, 1.0 eq.) was added CuCl (154 mg, 1.55 mmol, 10 eq.). The reaction was stirred at room temperature overnight. Then, excess CuCl was removed via filtration. All the volatile was removed under a fine vacuum, and **7** was obtained as a red powder (33 mg, 47%).

Single crystals suitable for X-ray crystal structure analysis were obtained from recrystallization at -35°C in the mixture solvent of DCM/n-hexane/THF.

**<sup>1</sup>H NMR** (600 MHz, CDCl<sub>3</sub>, 298K): δ [ppm] = 9.51 (d, *J*<sub>H-H</sub> = 8.1 Hz, 2H), 8.79 (t, *J*<sub>H-H</sub> = 8.0 Hz, 2H), 8.64 (d, *J*<sub>H-H</sub> = 5.7 Hz, 2H), 8.02 (t, *J*<sub>H-H</sub> = 6.8 Hz, 2H), 7.38 – 7.31 (m, 6H), 7.13 (d, *J*<sub>H-H</sub> = 7.0 Hz, 4H).

**<sup>11</sup>B NMR** (128 MHz, CDCl<sub>3</sub>, 298K): δ [ppm] = 9.75.

**<sup>13</sup>C{<sup>1</sup>H} NMR** (150 MHz, CDCl<sub>3</sub>, 298K): δ [ppm] = 145.68, 143.40, 132.69, 129.33, 129.10, 128.91, 125.24.

**HRMS** (m/z): Calc. For [**7**-CuCl<sub>2</sub>] (C<sub>22</sub>H<sub>18</sub>BN<sub>2</sub>): 321.1563 Found: 321.1557.

# **P-P coupling reactions:**

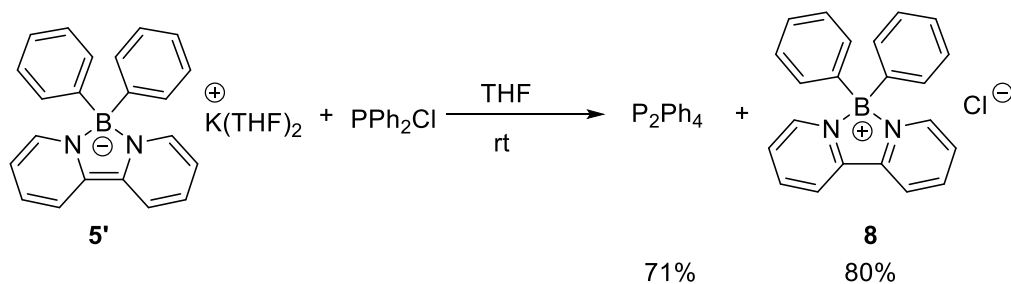

**From 5':** To the THF solution (5 mL) of [**5'**] (100 mg, 0.20 mmol, 1.0 eq.) was added PPh<sub>2</sub>Cl (90 mg, 0.40 mmol, 2.0 eq.). The reaction was stirred at room temperature overnight, and all the volatile was removed under a high vacuum afterward. The residue was extracted by n-hexane (2×6 mL). P<sub>2</sub>Ph<sub>4</sub> was in the hexane solution and obtained after being dried under a high vacuum, giving a yellow powder (54 mg, 71%). The residue was dried under high vacuum as **8** (59 mg, 80%).

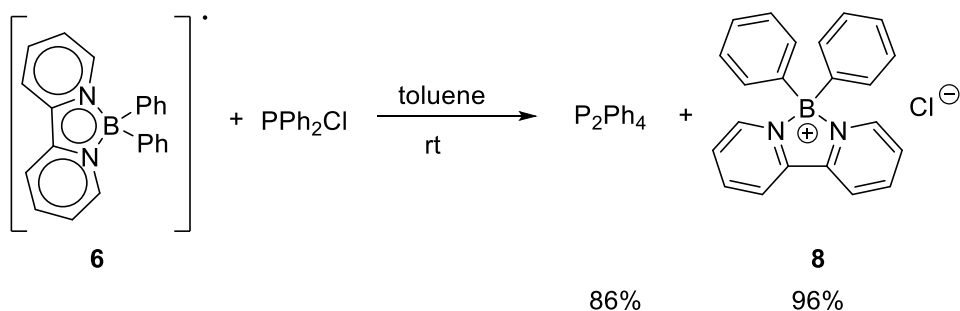

**From 6:** To the toluene solution (5 mL) of [**6**] (50 mg, 0.16 mmol, 1.0 eq.) was added PPh<sub>2</sub>Cl (35 mg, 0.16 mmol, 1.0 eq.). The reaction was stirred at room temperature overnight. All the volatile was removed under a high vacuum afterward. The residue was extracted by n-hexane (3×3 mL). P<sub>2</sub>Ph<sub>4</sub> was in the hexane solution and obtained after being dried under a high vacuum, giving a yellow powder (25 mg, 86%). The residue was dried under high vacuum as **8** (55 mg, 96%).

**P<sub>2</sub>Ph<sub>4</sub>:** <sup>1</sup>H NMR (400 MHz, C<sub>6</sub>D<sub>6</sub>, 298K): δ [ppm] = 7.58 – 7.52 (m, 4H), 6.97 – 6.91 (m, 6H).

<sup>31</sup>P{<sup>1</sup>H} NMR (161 MHz, C<sub>6</sub>D<sub>6</sub>, 298K): δ [ppm] = -15.01. The spectroscopic data are in accordance with the reported results.<sup>[2]</sup>

**[8]:** <sup>1</sup>H NMR (400 MHz, CDCl<sub>3</sub>, 298K): δ [ppm] = 10.72 (d, *J*<sub>H-H</sub> = 8.3 Hz, 2H), 8.71 (t, *J*<sub>H-H</sub> = 8.1 Hz, 2H), 8.57 (d, *J*<sub>H-H</sub> = 5.6 Hz, 2H), 7.95 (t, *J*<sub>H-H</sub> = 6.8 Hz, 2H), 7.40 – 7.29 (m, 6H), 7.08 (d, *J*<sub>H-H</sub> = 7.0 Hz, 4H).

<sup>11</sup>B NMR (128 MHz, CDCl<sub>3</sub>, 298K): δ [ppm] = 9.16

<sup>13</sup>C{<sup>1</sup>H} NMR (100 MHz, CDCl<sub>3</sub>, 298K): δ [ppm] = 145.70, 142.63, 132.55, 129.10, 128.94, 128.64, 127.30.

#### Sn-Sn coupling reactions:

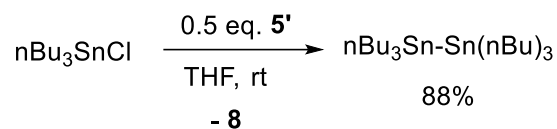

To the THF solution (3 mL) of [**5'**] (50 mg, 0.10 mmol, 1 eq.) was added nBu<sub>3</sub>SnCl (64 mg, 0.20 mmol, 2.0 eq.). The reaction was stirred at room temperature overnight, and all the volatile was removed under a high vacuum afterward. The residue was extracted by n-hexane, and n-Bu<sub>6</sub>Sn<sub>2</sub> was obtained after removing all the volatiles under a high vacuum (50 mg, 88%).

**nBu<sub>6</sub>Sn<sub>2</sub>**: **<sup>1</sup>H NMR** (400 MHz, C<sub>6</sub>D<sub>6</sub>, 298K): δ [ppm] = 1.80 – 1.58 (m, 12H), 1.47 – 1.36 (m, 12H), 1.26 – 1.07 (m, 12H), 0.98 (t, *J*<sub>H-H</sub> = 7.3 Hz, 18H).

**<sup>13</sup>C{<sup>1</sup>H} NMR** (100 MHz, C<sub>6</sub>D<sub>6</sub>, 298K): δ [ppm] = 29.87, 27.74, 13.78, 10.23.

**<sup>119</sup>Sn{<sup>1</sup>H} NMR** (149 MHz, C<sub>6</sub>D<sub>6</sub>, 298K): δ [ppm] = -83.72. The spectroscopic data are in accordance with those reported in the literature.<sup>[3]</sup>

#### Se-Se coupling reactions:

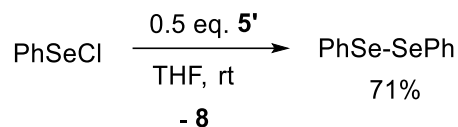

PhSeCl (38 mg, 0.20 mmol, 2.0 eq.) was added to the THF solution (3 mL) of [**5'**] (50 mg, 0.10 mmol, 1.0 eq.). The reaction was stirred at room temperature overnight, and all the volatile was removed under a high vacuum afterward. Ph<sub>2</sub>Se<sub>2</sub> was successfully isolated using PTLC (n-hexane) and obtained as a yellow powder (22 mg, 71%).

**Ph<sub>2</sub>Se<sub>2</sub>**: **<sup>1</sup>H NMR** (400 MHz, CDCl<sub>3</sub>, 298K): δ [ppm] = 7.66 – 7.57 (m, 4H), 7.34-7.21 (m, 6H). The spectroscopic data are in accordance with those reported in the literature.<sup>[4]</sup>

### Ge-Ge coupling reactions:

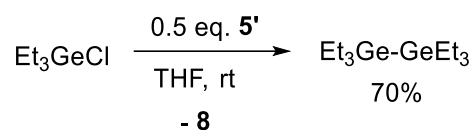

A THF solution (1 mL) of Et<sub>3</sub>GeCl (38 mg, 0.20 mmol, 2.0 eq.) was added to [**5'**] (50 mg, 0.10 mmol, 1.0 eq.) in THF (3 mL). The reaction was stirred at room temperature overnight, and all the volatile was removed under a high vacuum afterward. Et<sub>6</sub>Ge<sub>2</sub> was purified through column chromatography using n-hexane as an eluent and obtained as a colorless oil (11 mg, 70%).

**Et<sub>6</sub>Ge<sub>2</sub>:** <sup>1</sup>H NMR (400 MHz, CDCl<sub>3</sub>, 298K): δ [ppm] = 1.05 (t, *J*<sub>H-H</sub> = 7.7 Hz, 18H), 0.86 (q, *J*<sub>H-H</sub> = 7.6 Hz, 12H).

<sup>13</sup>C{<sup>1</sup>H} NMR (100 MHz, CDCl<sub>3</sub>, 298K): δ [ppm] = 10.08, 5.44. The spectroscopic data are in accordance with the results reported in the literature.<sup>[5]</sup>

### H-H coupling reactions:

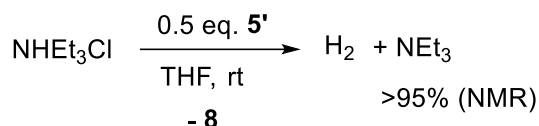

Compound [**5'**] (50 mg, 0.10 mmol, 1.0 eq.) and NHEt<sub>3</sub>Cl (27 mg, 0.20 mmol, 2.0 eq.) were mixed in THF-d<sub>8</sub> (0.55 mL) at room temperature. After 12 hours, the clean generation of NEt<sub>3</sub> was observed in <sup>1</sup>H NMR (Supplementary Figure 24)<sup>[1]</sup>, and the formation of H<sub>2</sub> was confirmed by GC spectra (Supplementary Figure 28).

#### Reductive Pyridine couplings:

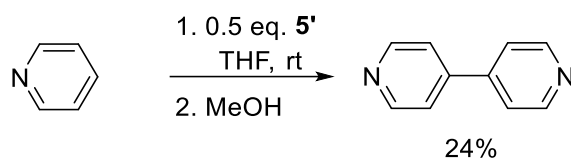

To the THF solution (3 mL) of [**5'**] (100 mg, 0.20 mmol, 1.0 eq.) was added pyridine (32 mg, 0.40 mmol, 2.0 eq.). The reaction was stirred at room temperature for 5 days or 60°C overnight. Drops of MeOH were added to quench the reaction. 4,4'-bipyridine was isolated using PTLC (EA: DCM=2:1, 1%NEt<sub>3</sub>) and obtained as a yellow powder (7.6 mg, 24%).

**4,4'-bipyridine:** <sup>1</sup>H NMR (400 MHz, CDCl<sub>3</sub>, 298K): δ [ppm] = 8.74 (dd, *J*<sub>H-H</sub> = 1.7 Hz, 4H), 7.53 (dd, *J*<sub>H-H</sub> = 1.7 Hz, 4H). The spectroscopic data are in accordance with those reported in the literature.<sup>[6]</sup>

#### The reduction of acridine:

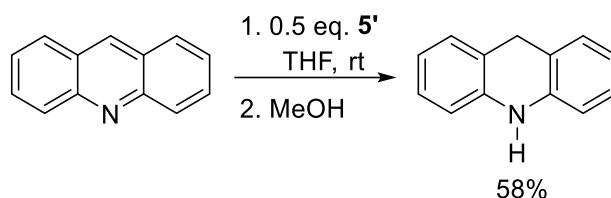

To the solid mixture of [**5'**] (50 mg, 0.10 mmol, 1.0 eq.) and acridine (36 mg, 0.20 mmol, 2.0 eq.) was added THF (5 mL). The reaction was stirred at room temperature overnight. Drops of MeOH were added to quench the reaction. Acridan was isolated using PTLC (EA: hex=1:5) and obtained as a white powder (21 mg, 58%).

**Acridan:** <sup>1</sup>H NMR (400 MHz, CDCl<sub>3</sub>, 298K): δ [ppm] = 7.12 - 7.05 (m, 4H), 6.85 (td, *J*<sub>H-H</sub> = 7.4 Hz, 1.2 Hz, 2H), 6.67 (dd, *J*<sub>H-H</sub> = 7.8 Hz, 1.2 Hz, 2H), 5.96 (s, 1H), 4.06 (s, 2H). The spectroscopic data are in accordance with the results reported in the literature.<sup>[6]</sup>

### CO<sub>2</sub> reactions:

**5'**: The THF solution (10 mL) of [**5'**] (50 mg, 0.10 mmol) was degassed in a 250 mL Schlenk tube. An atmosphere of CO<sub>2</sub> was then introduced to the reaction mixture. The reaction was stirred at room temperature overnight. A lot of insoluble solids precipitated. The generation of CO was confirmed by in-situ GC-spectra (Supplementary Figure31). The solids were filtered and washed with THF (1 mL, thrice). The solids were soluble in D<sub>2</sub>O. <sup>13</sup>C{<sup>1</sup>H} NMR (100 MHz, D<sub>2</sub>O, 298K) spectroscopy was subsequently deployed, where a signal at  $\delta$  (ppm) = 163.59 was detected (Supplementary Figure27). However, this signal disappeared after the addition of an excess of HCl (2M in dioxane).

**Catalytic fashion:** The THF solution (10 mL) of [**5'**] (39 mg, 0.077 mmol, 1.0 eq.) and K (122 mg, 3.12 mmol, 40 eq.) was degassed in a 100mL Schlenk tube. A controlled CO<sub>2</sub> atmosphere at 1 atm was introduced (100 mL, about 4 mmol). After being stirred at room temperature for three days, the solution underwent a transformation whereby the potassium was no longer visible, and a lot of insoluble solids precipitated. All the volatiles were reduced from the setup, and the resultant organic products were meticulously rinsed using acetone. After removing the acetone, K<sub>2</sub>CO<sub>3</sub> was obtained as a grey powder (152 mg, 70%). <sup>13</sup>C{<sup>1</sup>H} NMR (100 MHz, D<sub>2</sub>O, 298K):  $\delta$  [ppm] = 168.33. The spectroscopic data are in accordance with that of commercial K<sub>2</sub>CO<sub>3</sub>.

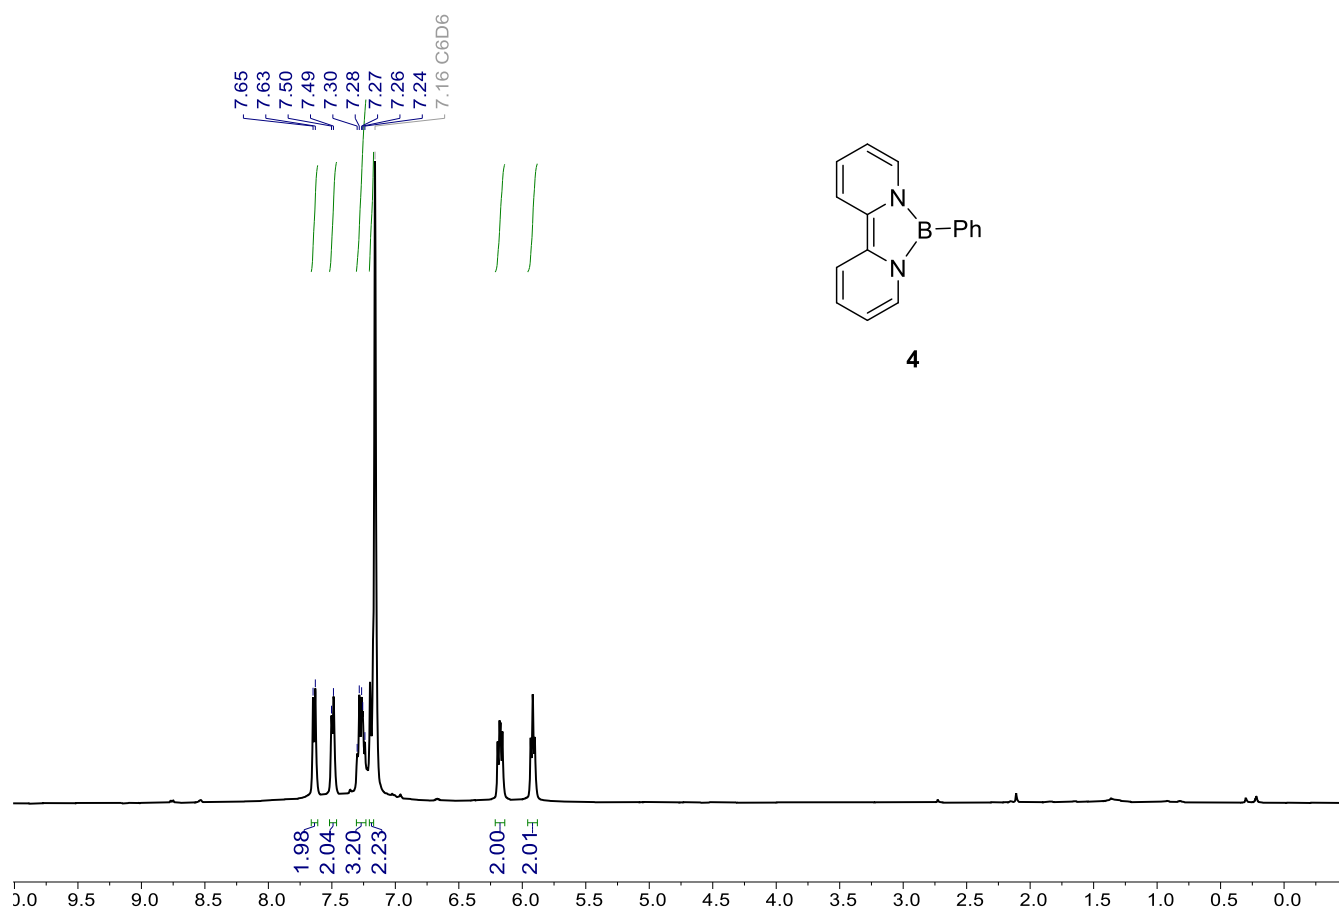

**Supplementary Figure 1.** <sup>1</sup>H NMR of **4** in C<sub>6</sub>D<sub>6</sub>

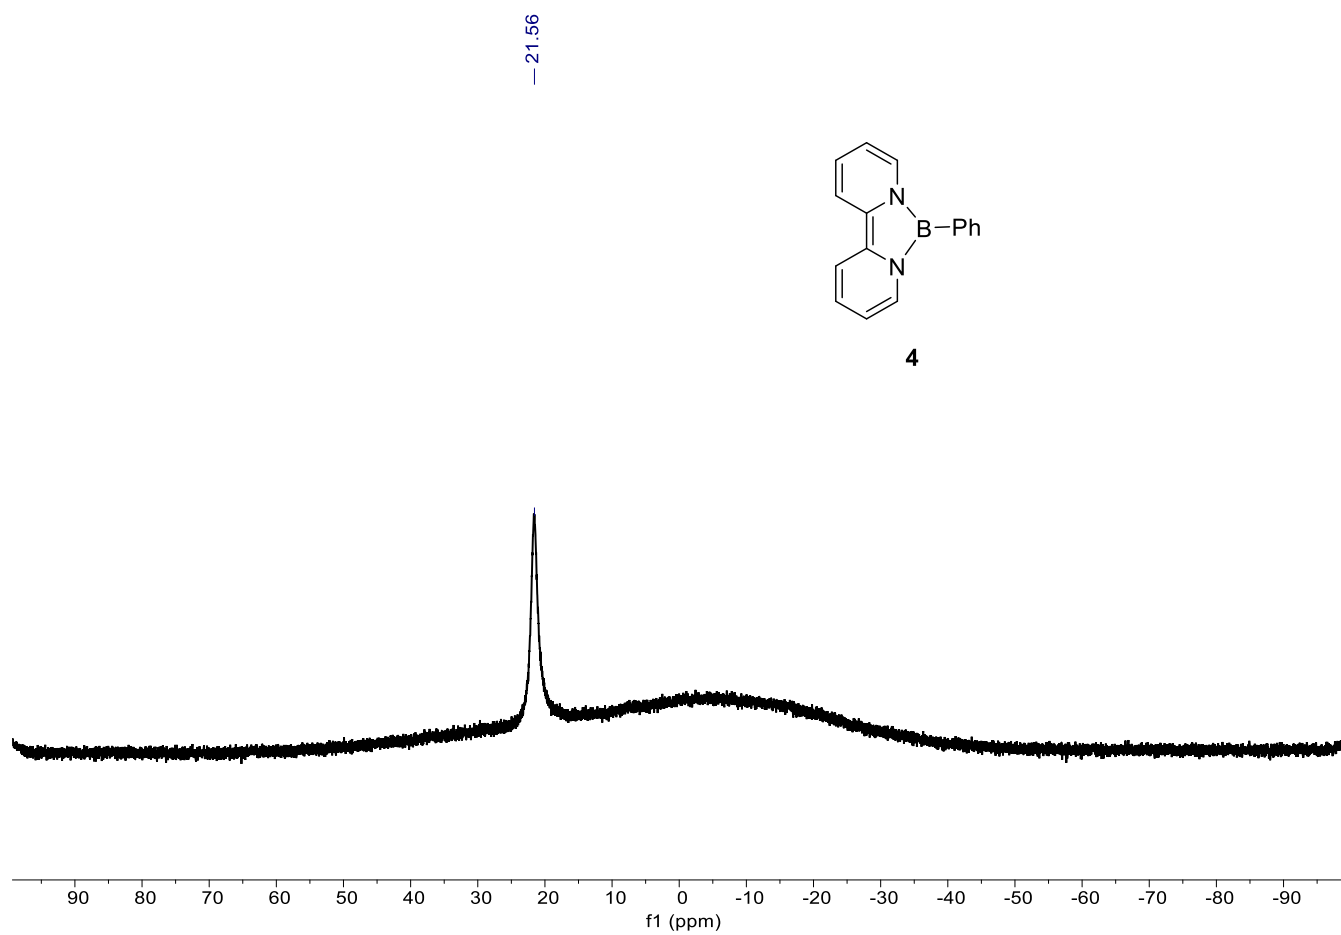

**Supplementary Figure 2.**  $^{11}\text{B}$  NMR of **4** in  $\text{C}_6\text{D}_6$

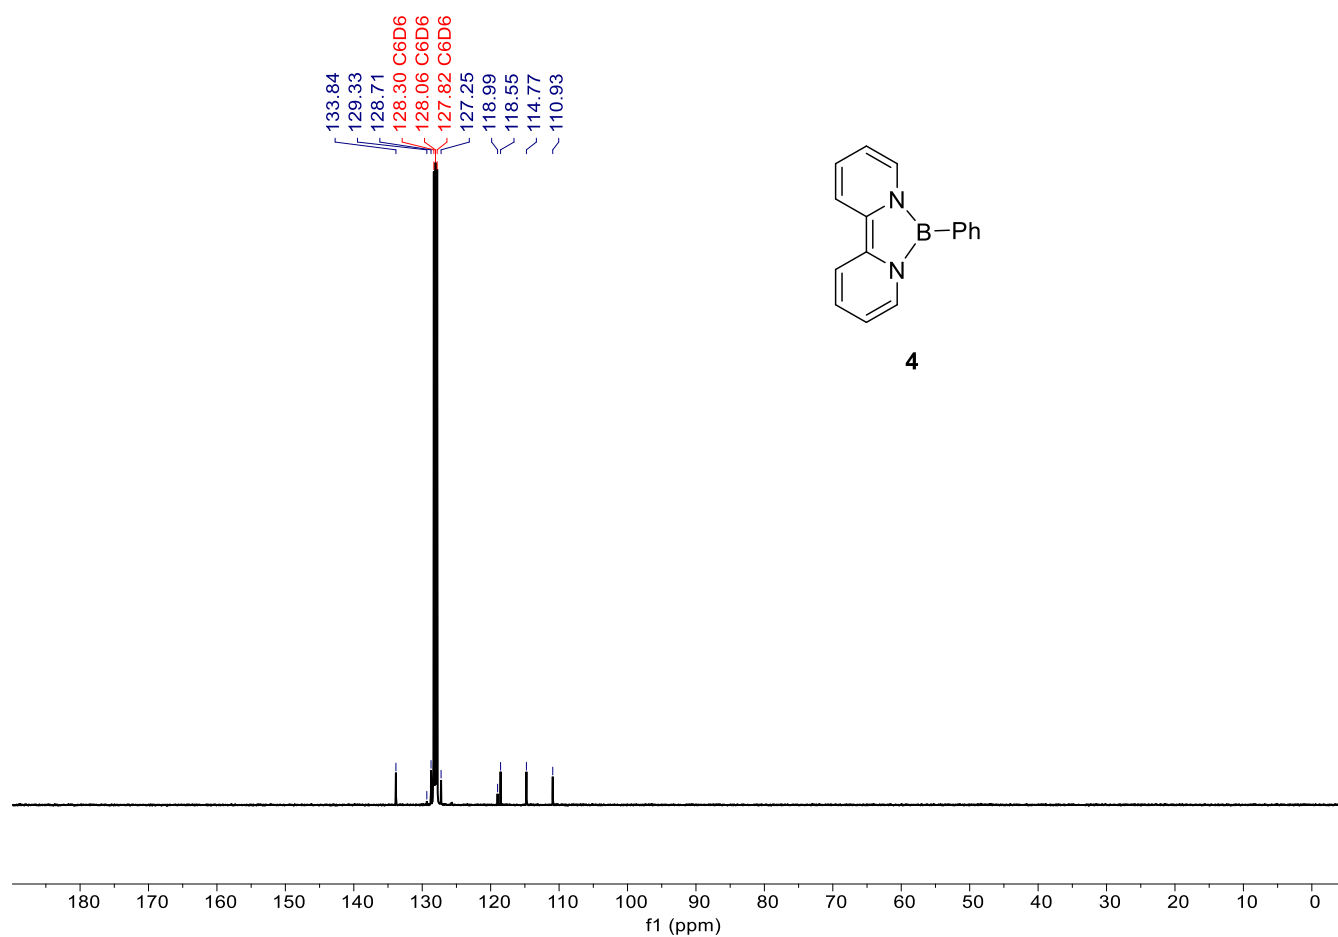

Supplementary Figure 3.  $^{13}\text{C}\{^1\text{H}\}$  NMR of **4** in  $\text{C}_6\text{D}_6$

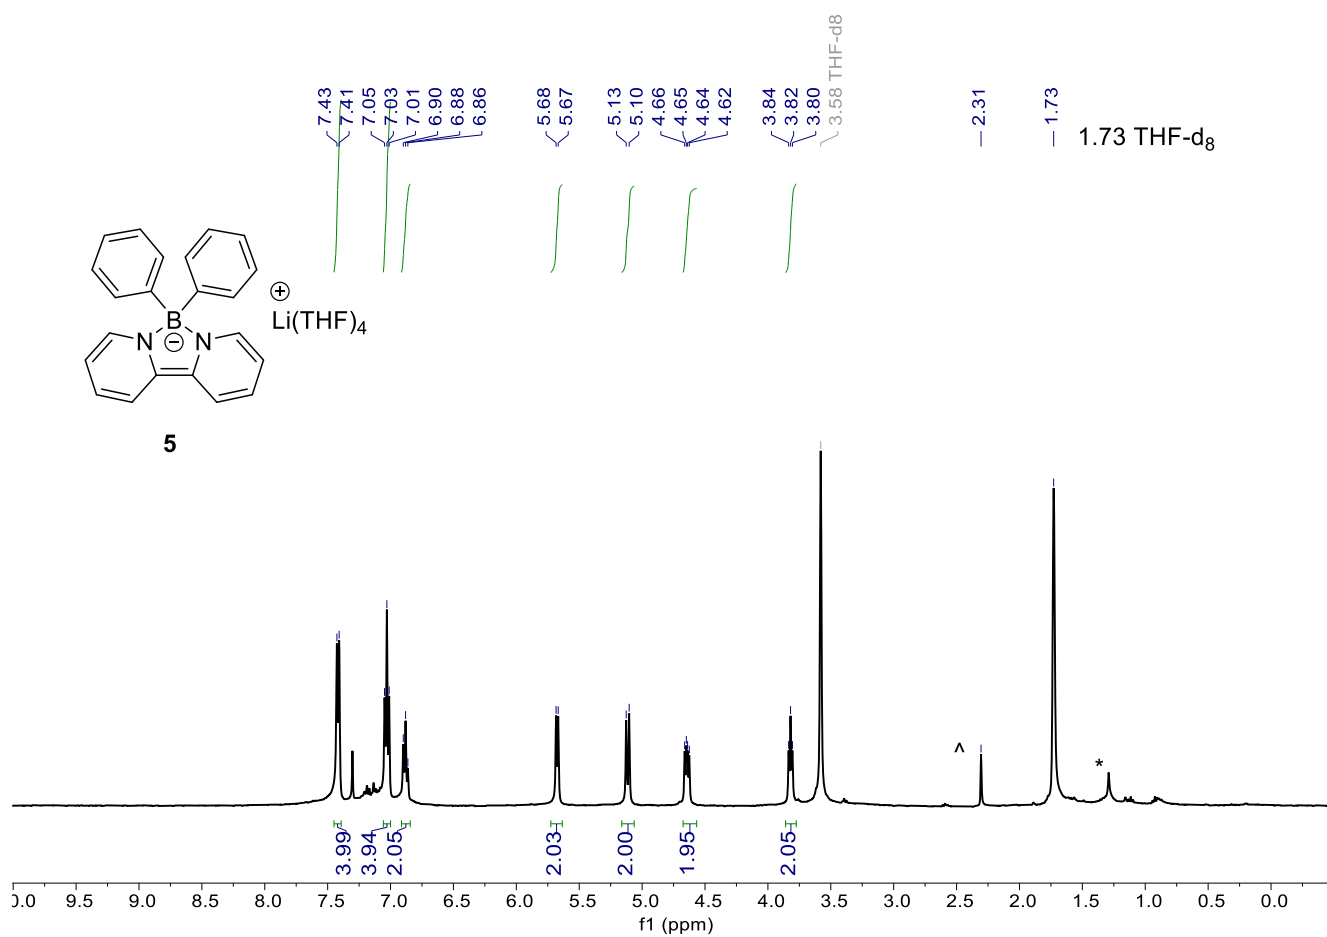

**Supplementary Figure 4.** <sup>1</sup>H NMR of **5** in THF-d<sub>8</sub> (\*: H grease; ^: toluene)

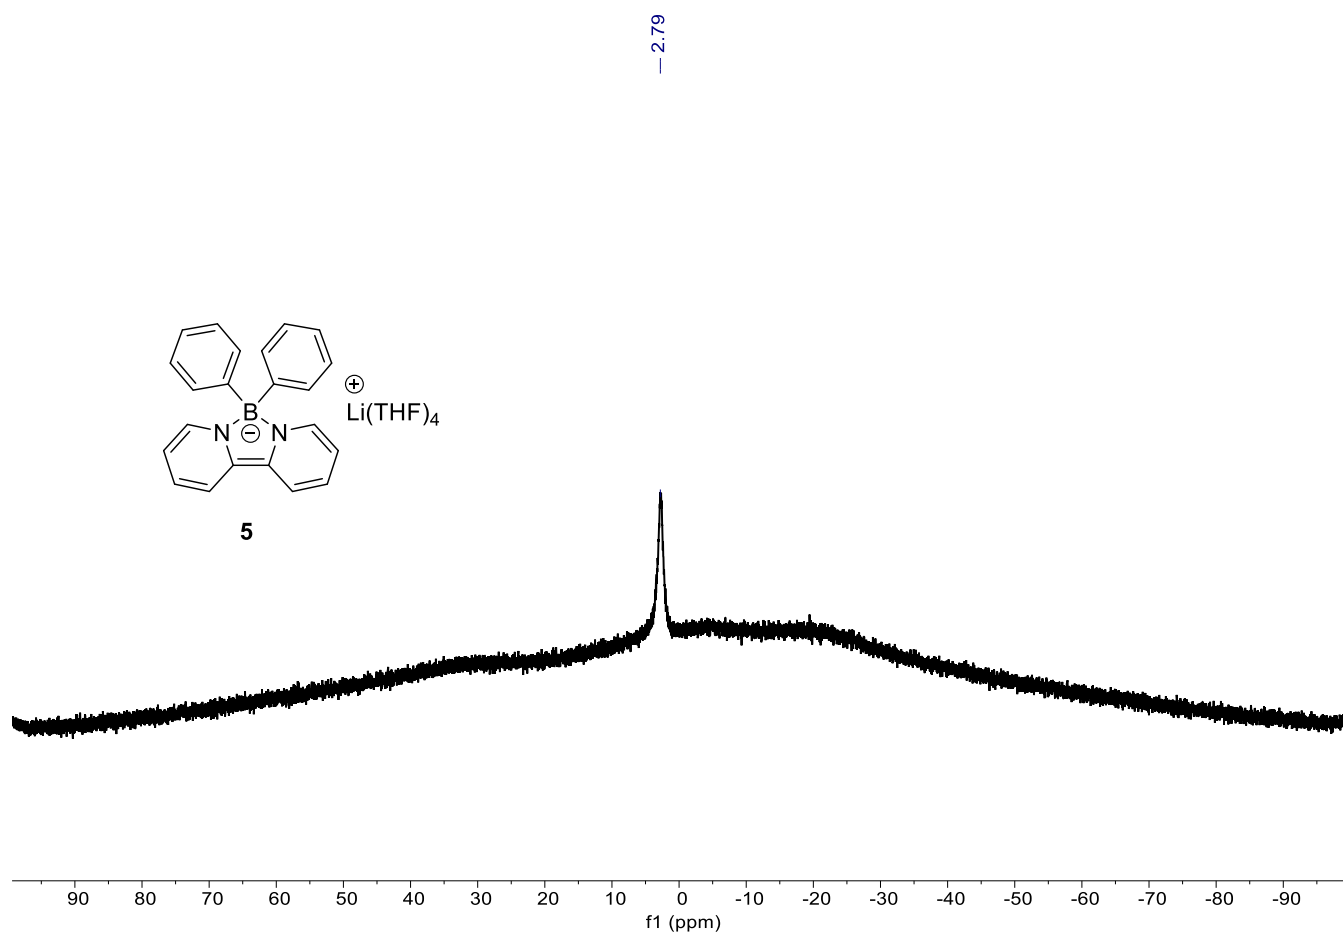

**Supplementary Figure 5.**  $^{11}\text{B}$  NMR of **5** in  $\text{THF-d}_8$

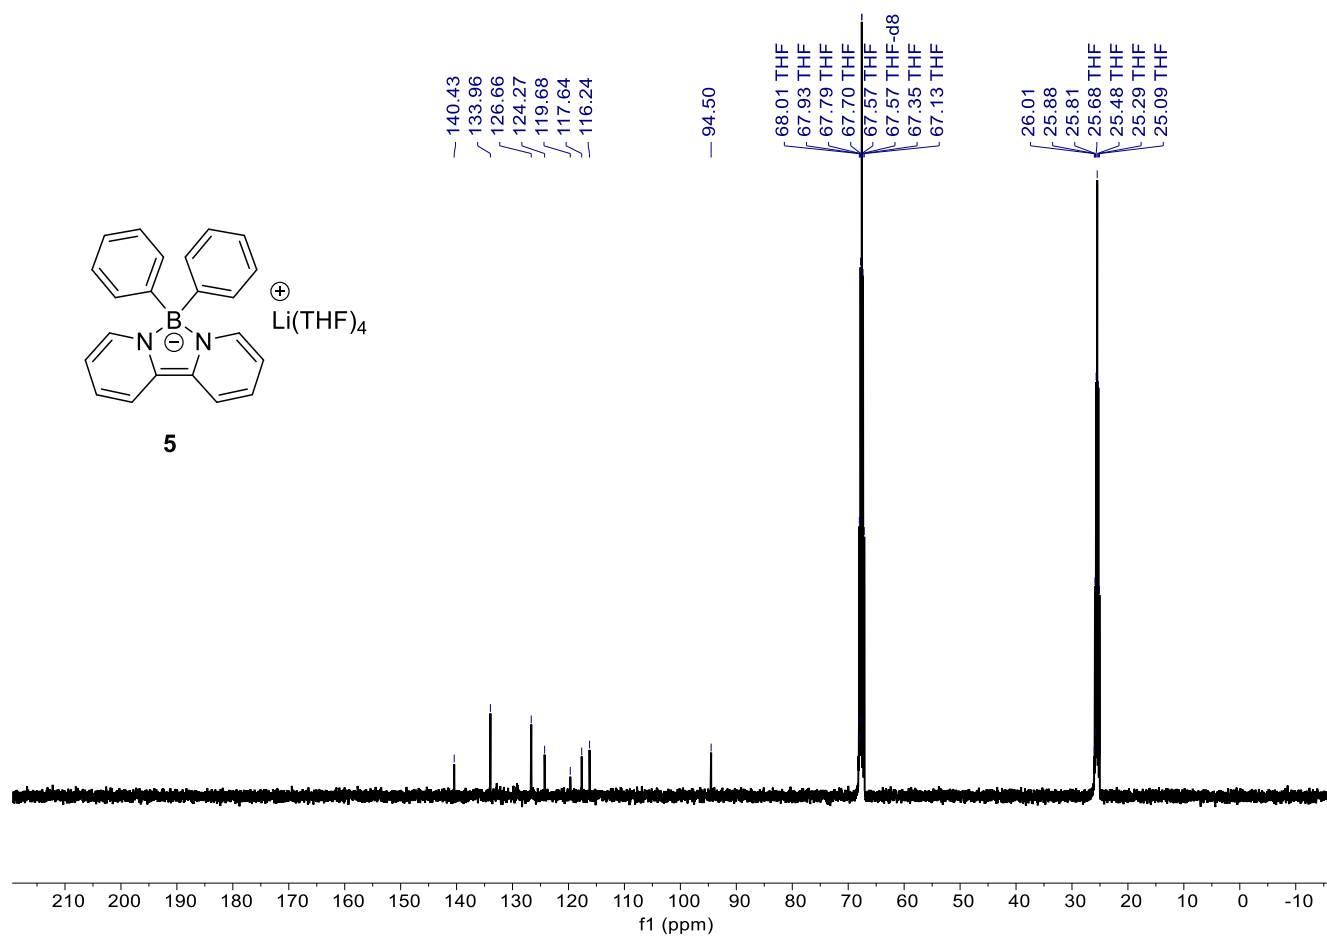

Supplementary Figure 6. <sup>13</sup>C{<sup>1</sup>H} NMR of **5** in THF-d<sub>8</sub>

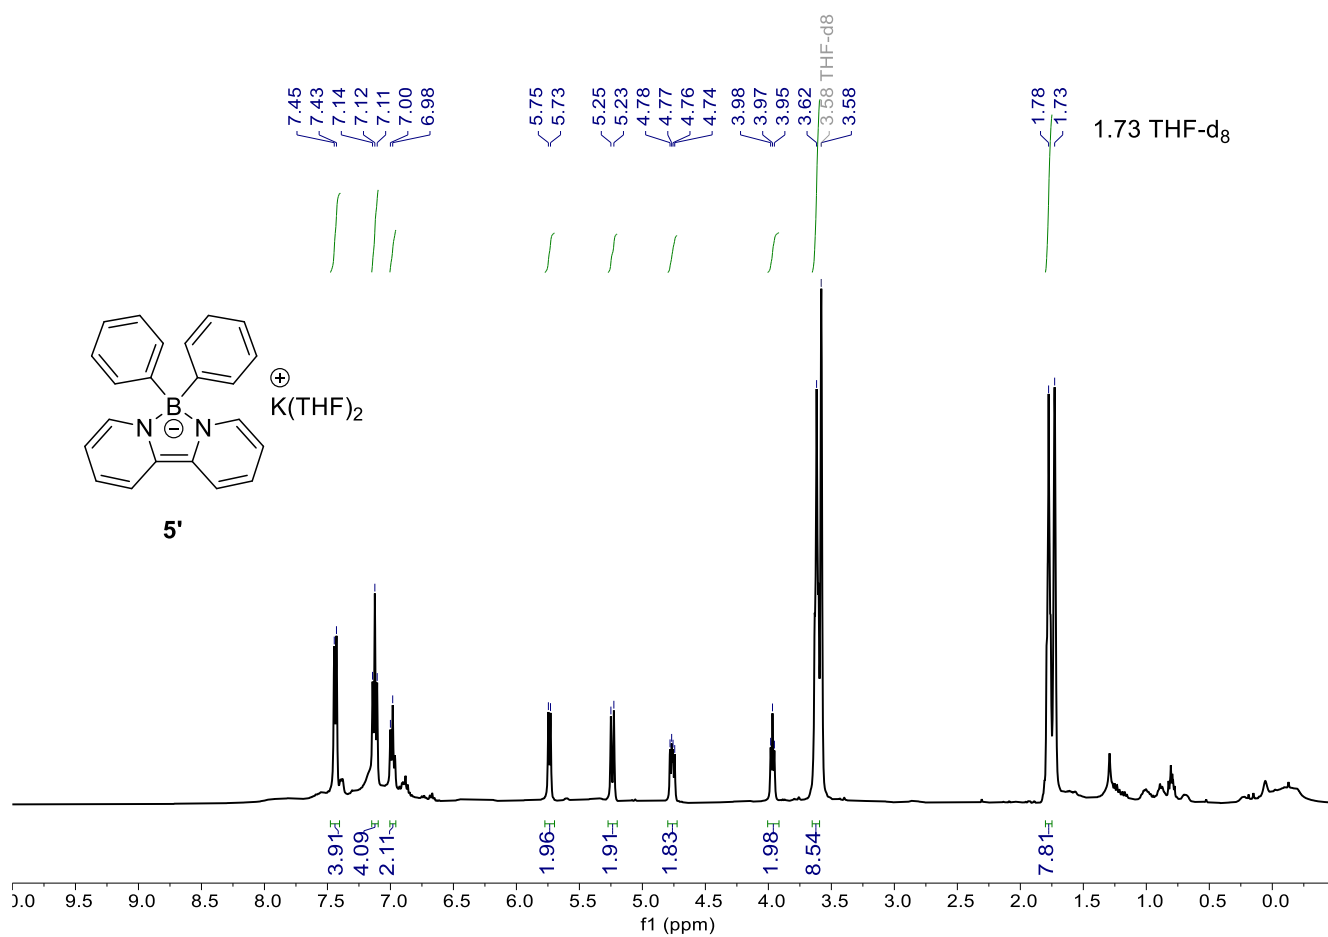

**Supplementary Figure 7.** <sup>1</sup>H NMR of **5'** in THF-d<sub>8</sub>

- 2.73

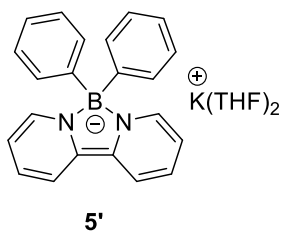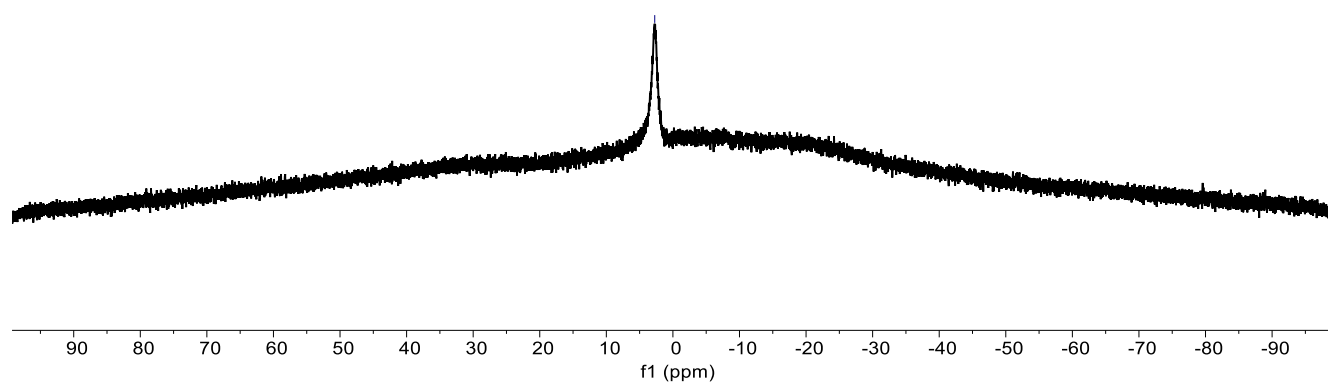

**Supplementary Figure 8.**  $^{11}\text{B}$  NMR of **5'** in  $\text{THF-d}_8$

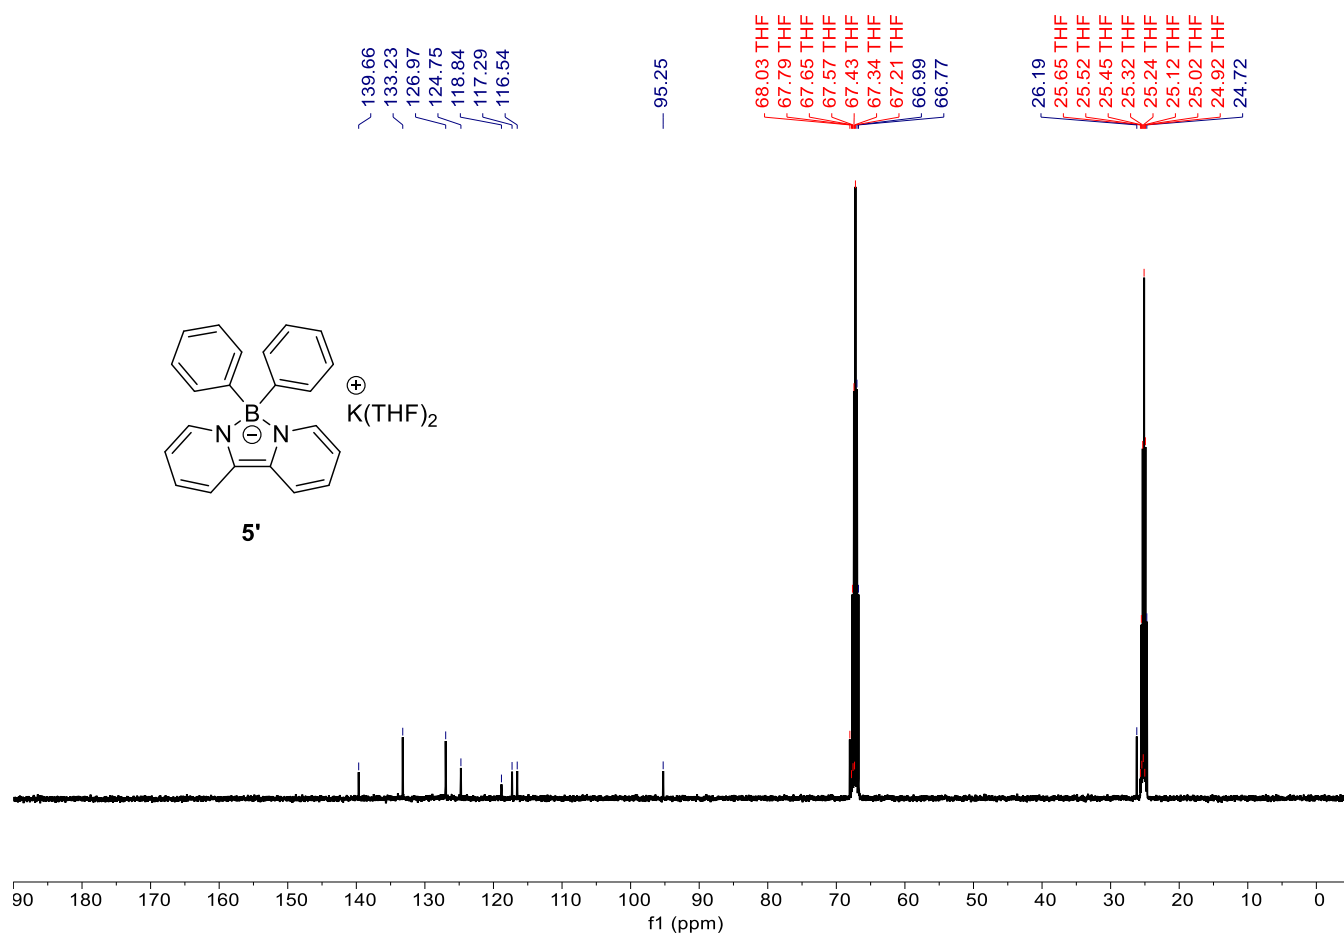

**Supplementary Figure 9.**  $^{13}\text{C}\{^1\text{H}\}$  NMR of **5'** in THF- $d_8$

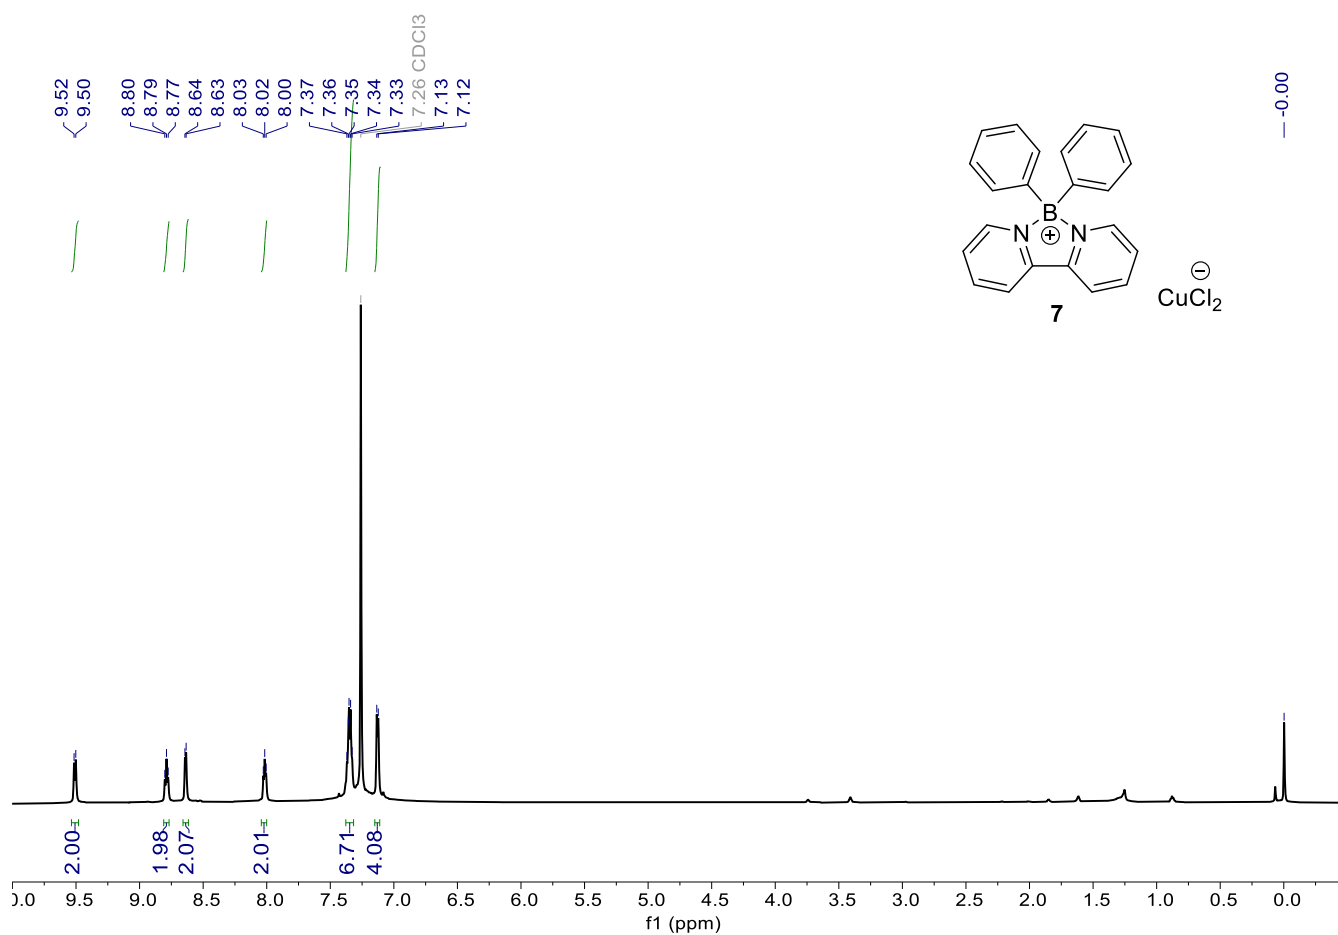

**Supplementary Figure 10.**  $^1\text{H}$  NMR of **7** in  $\text{CDCl}_3$

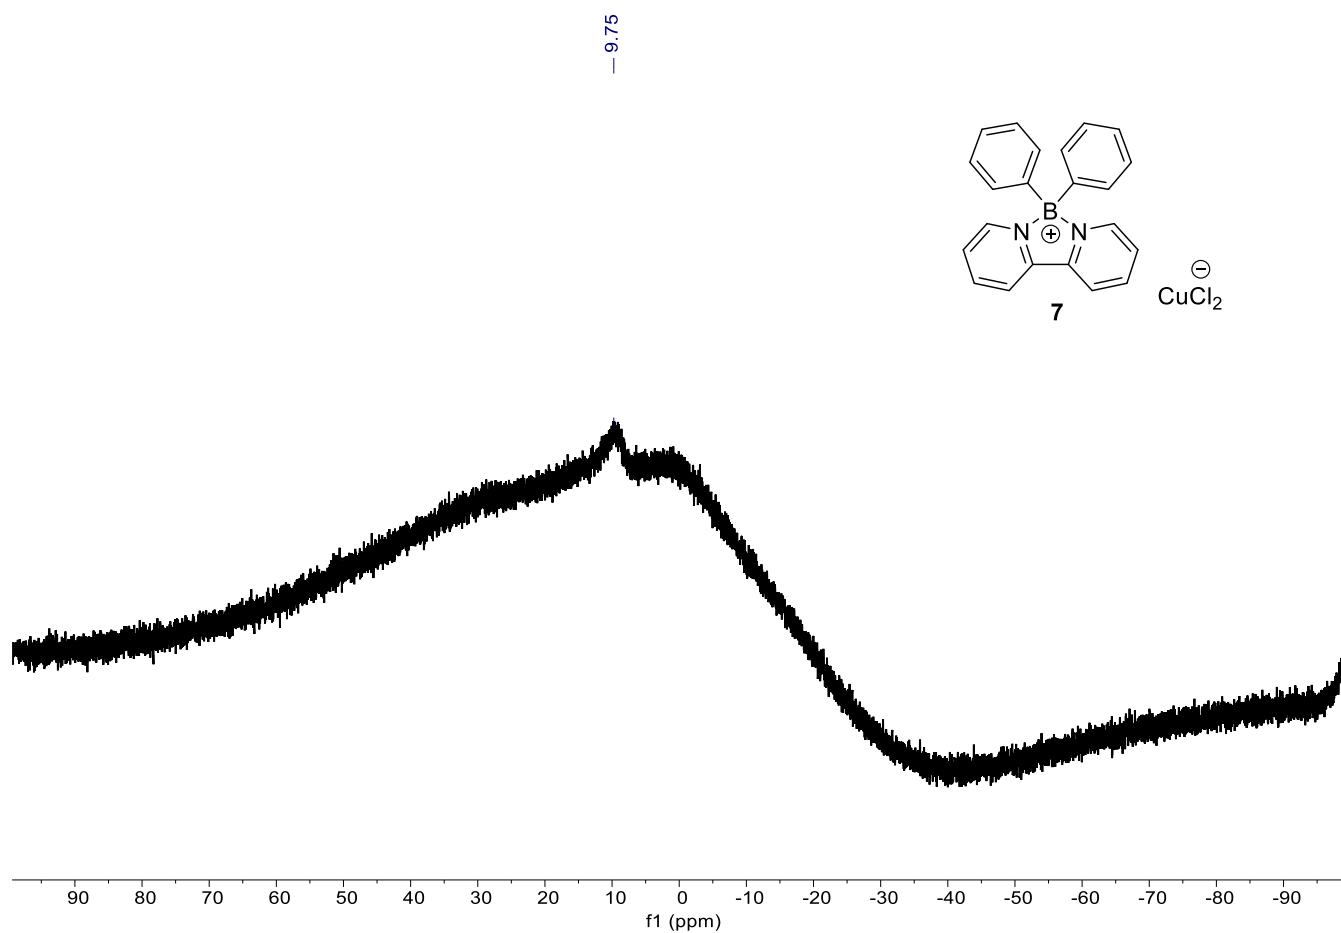

**Supplementary Figure 11.**  $^{11}\text{B}$  NMR of **7** in  $\text{CDCl}_3$

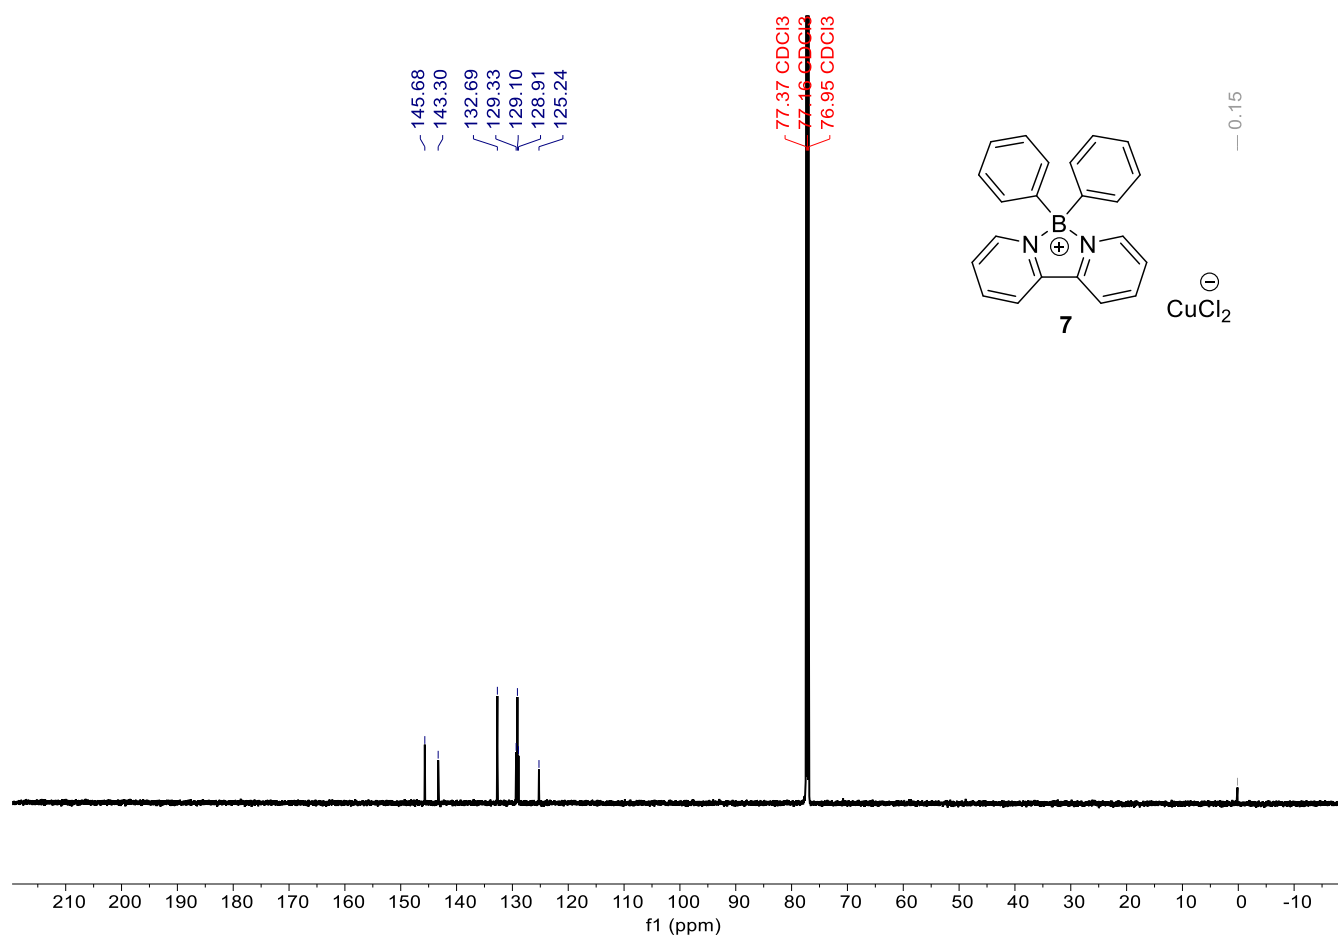

**Supplementary Figure 12.**  $^{13}\text{C}\{^1\text{H}\}$  NMR of **7** in  $\text{CDCl}_3$

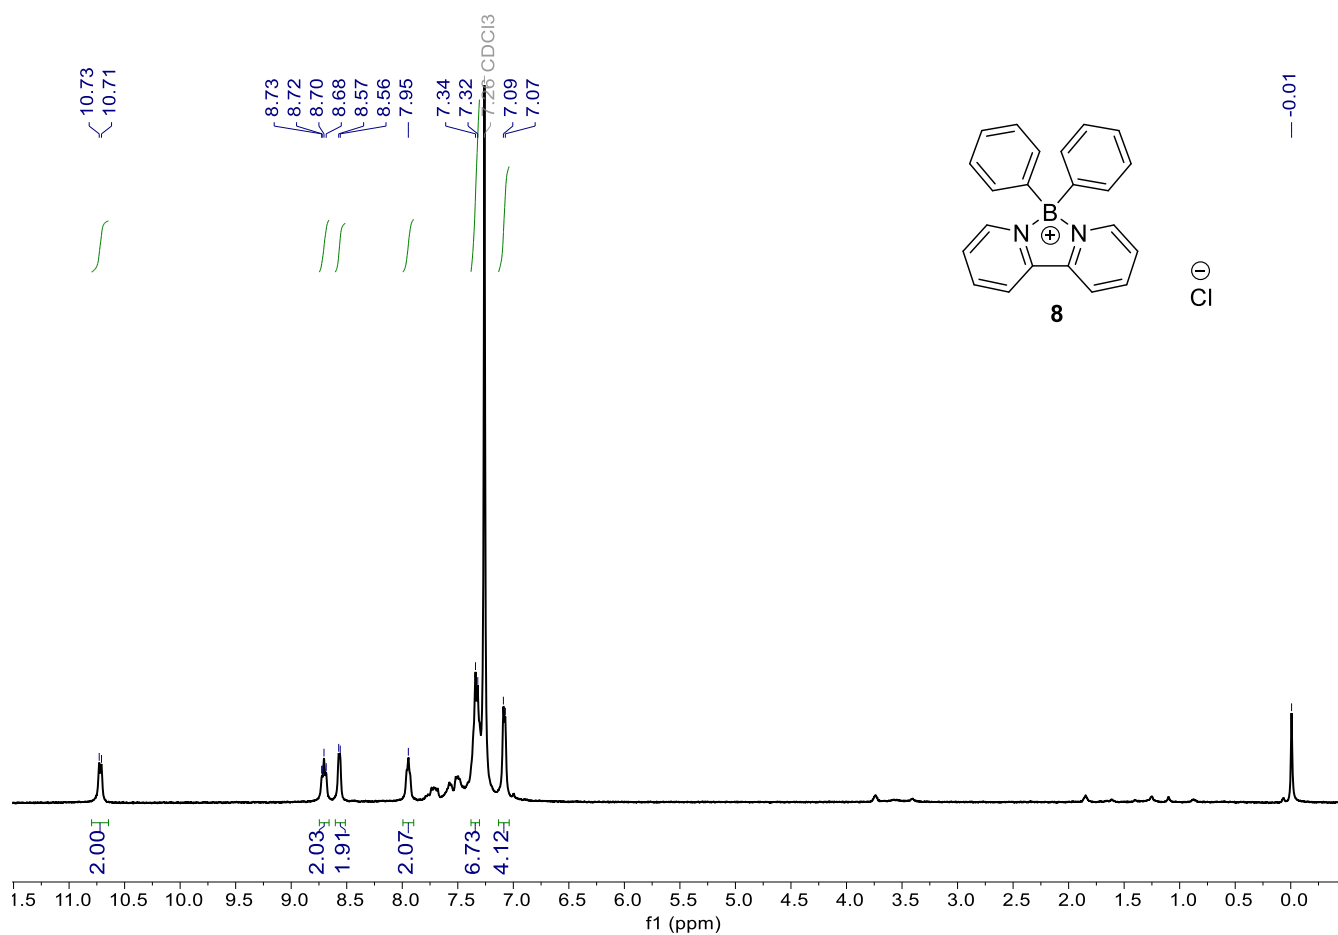

**Supplementary Figure 13.** <sup>1</sup>H NMR of **8** in CDCl<sub>3</sub>

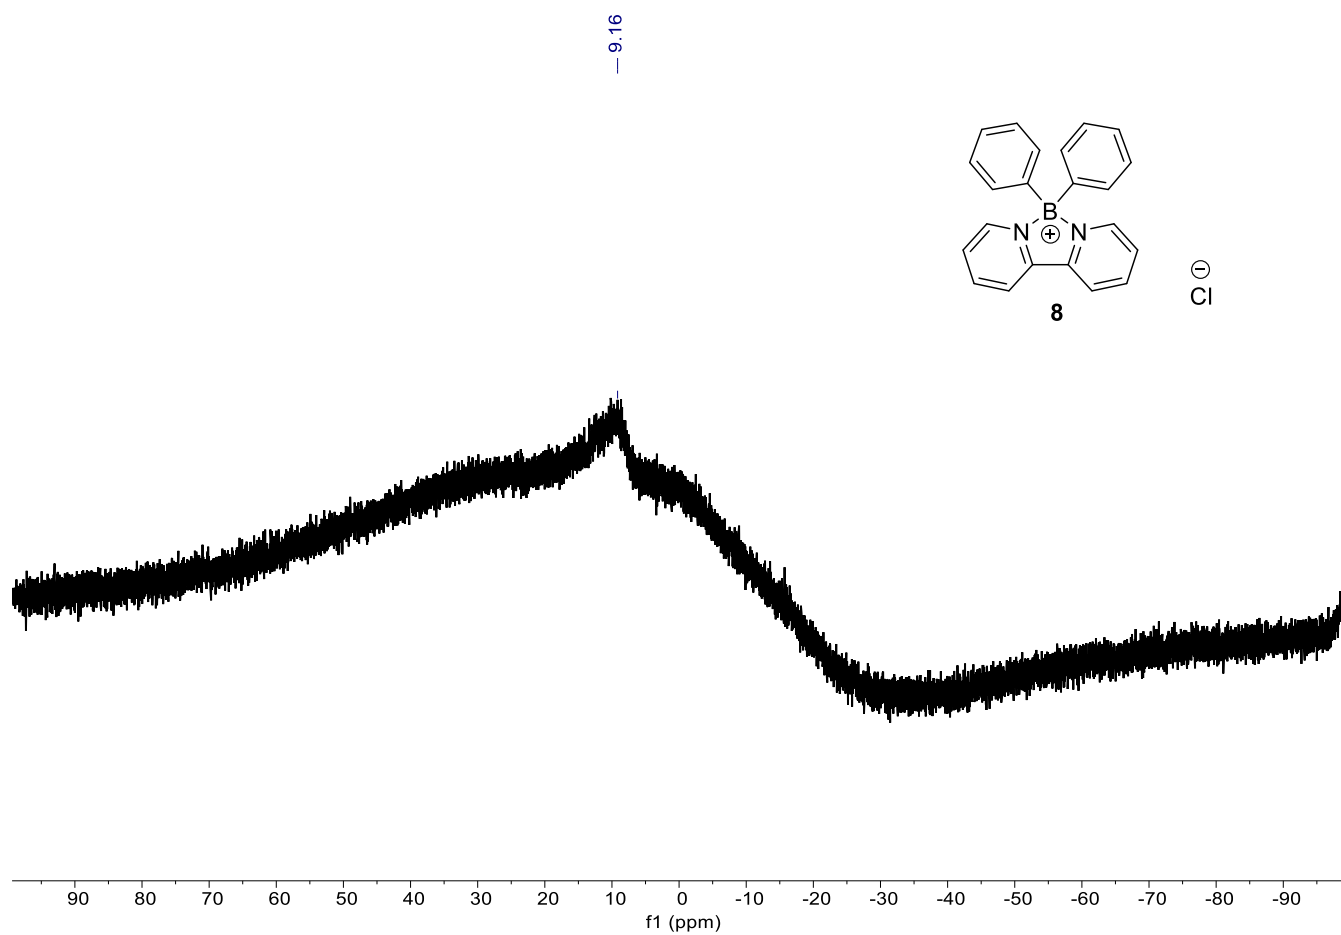

**Supplementary Figure 14.**  $^{11}\text{B}$  NMR of **8** in  $\text{CDCl}_3$

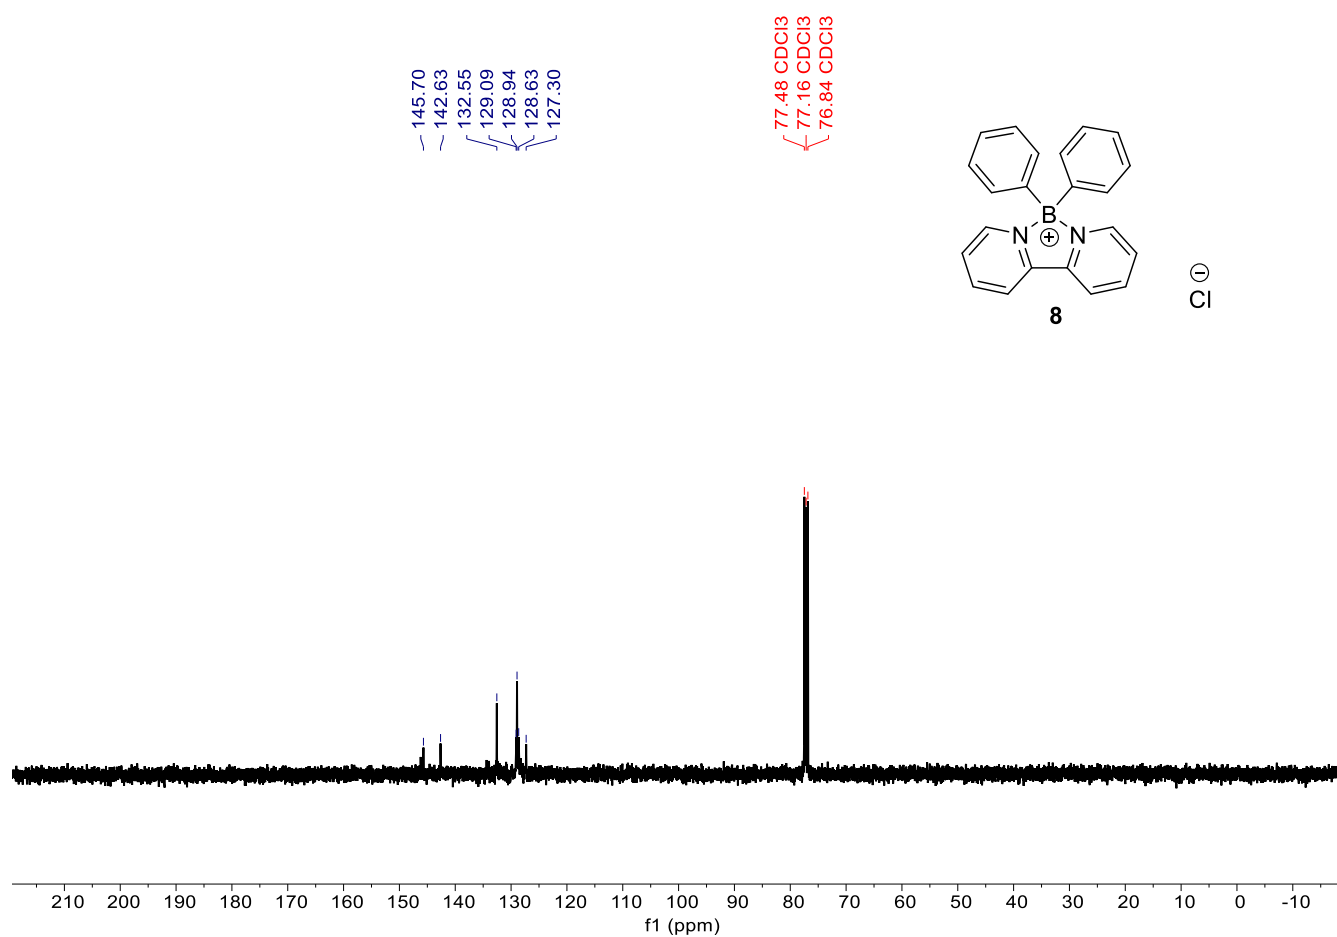

**Supplementary Figure 15.**  $^{13}\text{C}\{^1\text{H}\}$  NMR of **8** in  $\text{CDCl}_3$

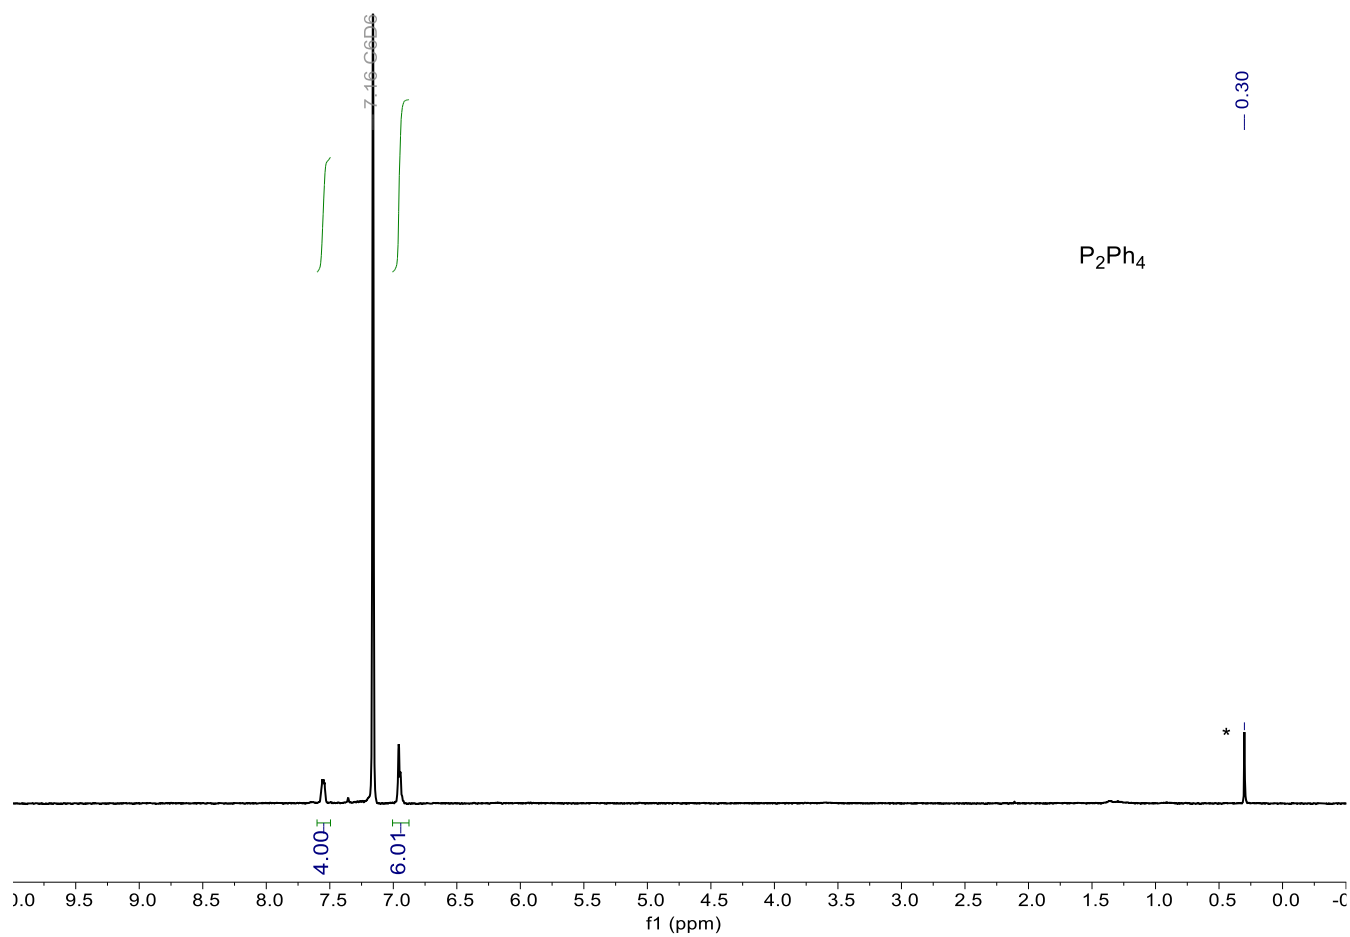

**Supplementary Figure 16.**  $^1H$  NMR of  $P_2Ph_4$  in  $C_6D_6$  (\*: silicone grease from SPS purified n-hexane)

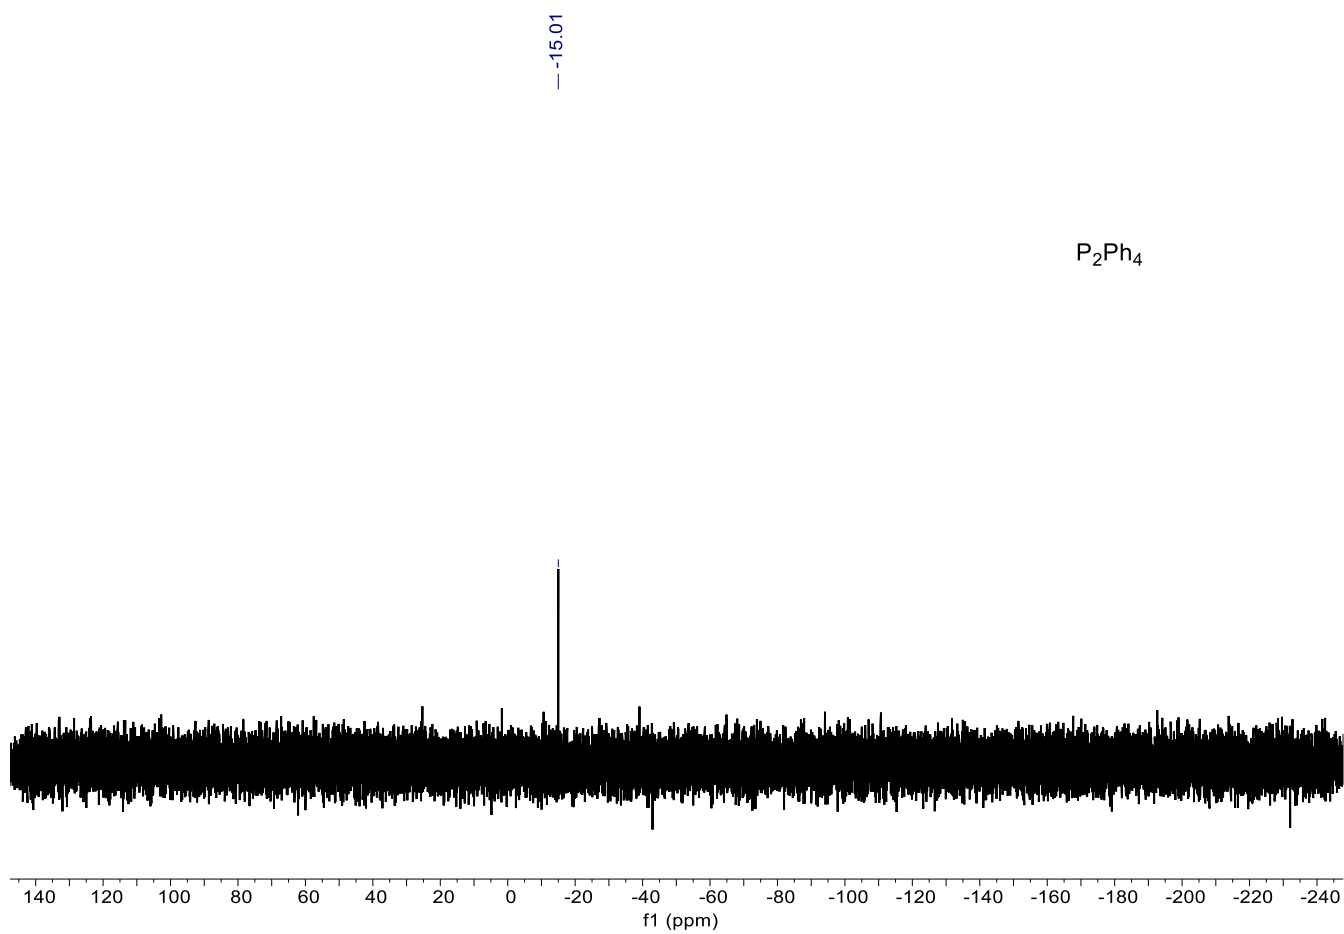

**Supplementary Figure 17.**  $^{31}P\{^1H\}$  NMR of  $P_2Ph_4$  in  $C_6D_6$

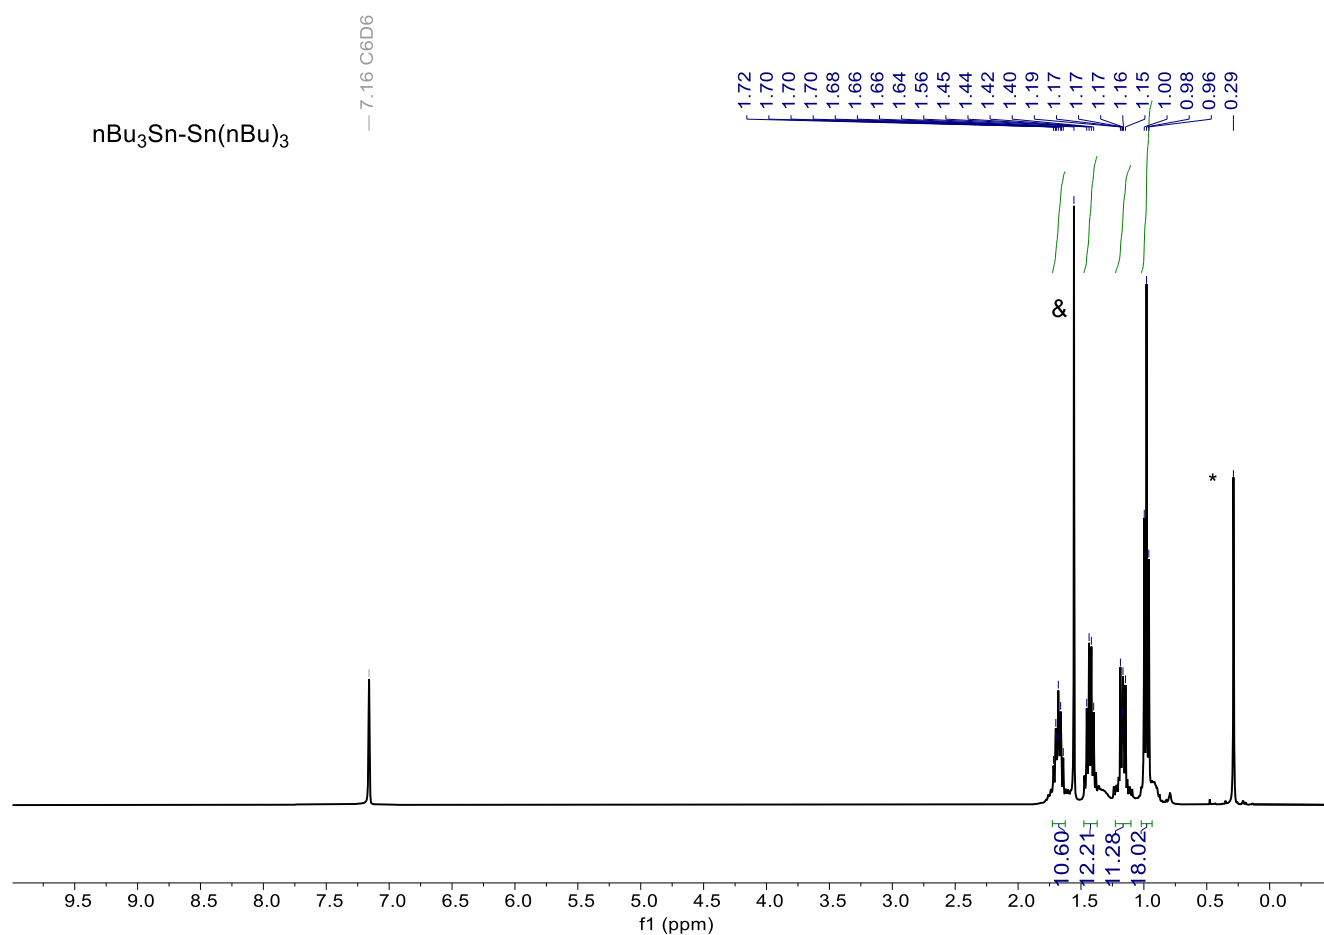

**Supplementary Figure 18.**  $^1\text{H}$  NMR of  $\text{nBu}_6\text{Sn}_2$  in  $\text{C}_6\text{D}_6$  (\*: silicone grease from SPS purified n-hexane; &: acetone from deuterated solvent)

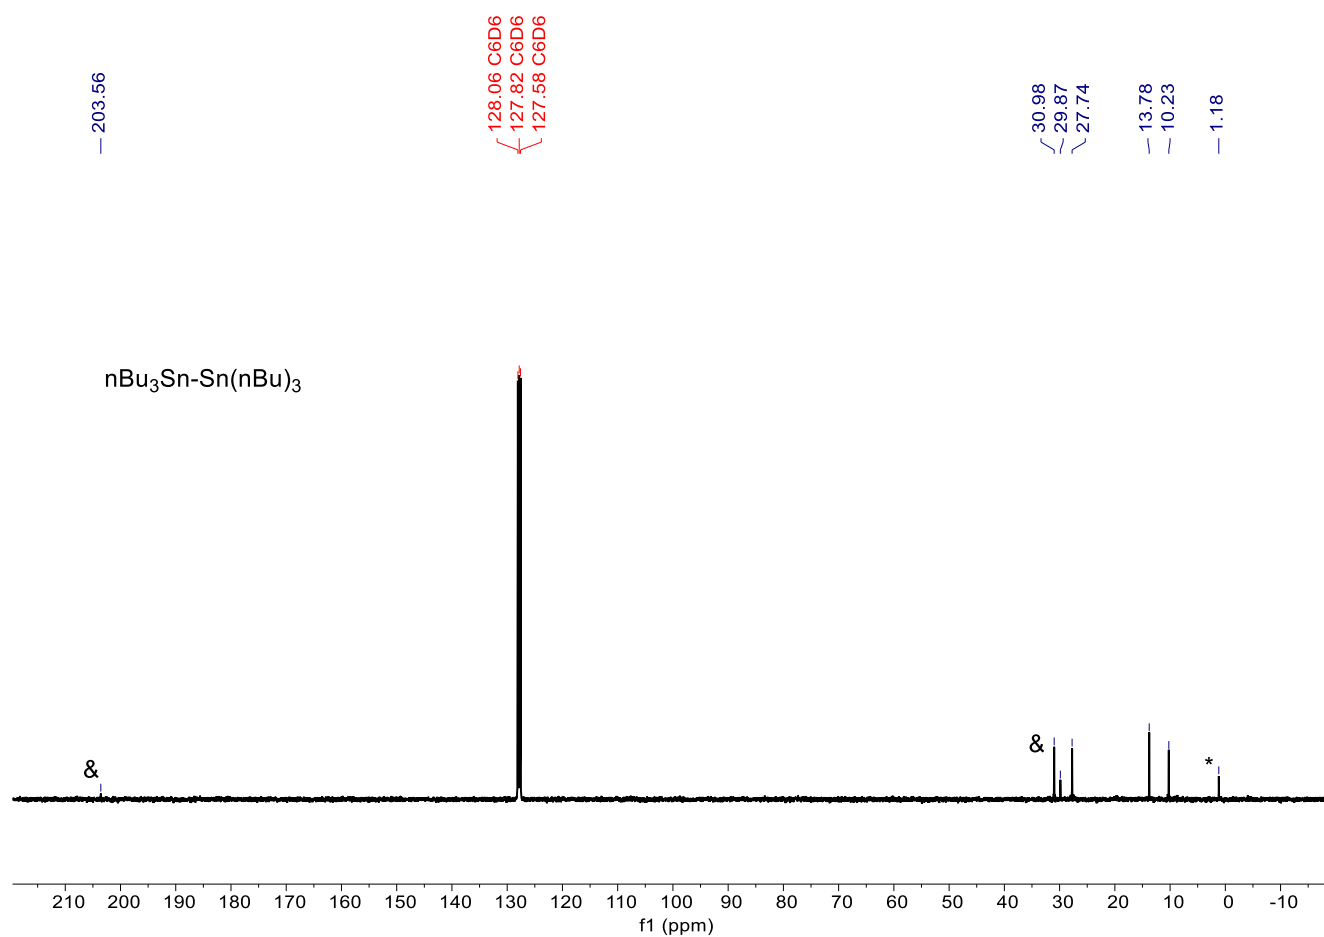

**Supplementary Figure 19.**  $^{13}\text{C}\{^1\text{H}\}$  NMR of  $\text{nBu}_6\text{Sn}_2$  in  $\text{C}_6\text{D}_6$  (\*: silicone grease from SPS purified n-hexane; &: acetone from deuterated solvent)

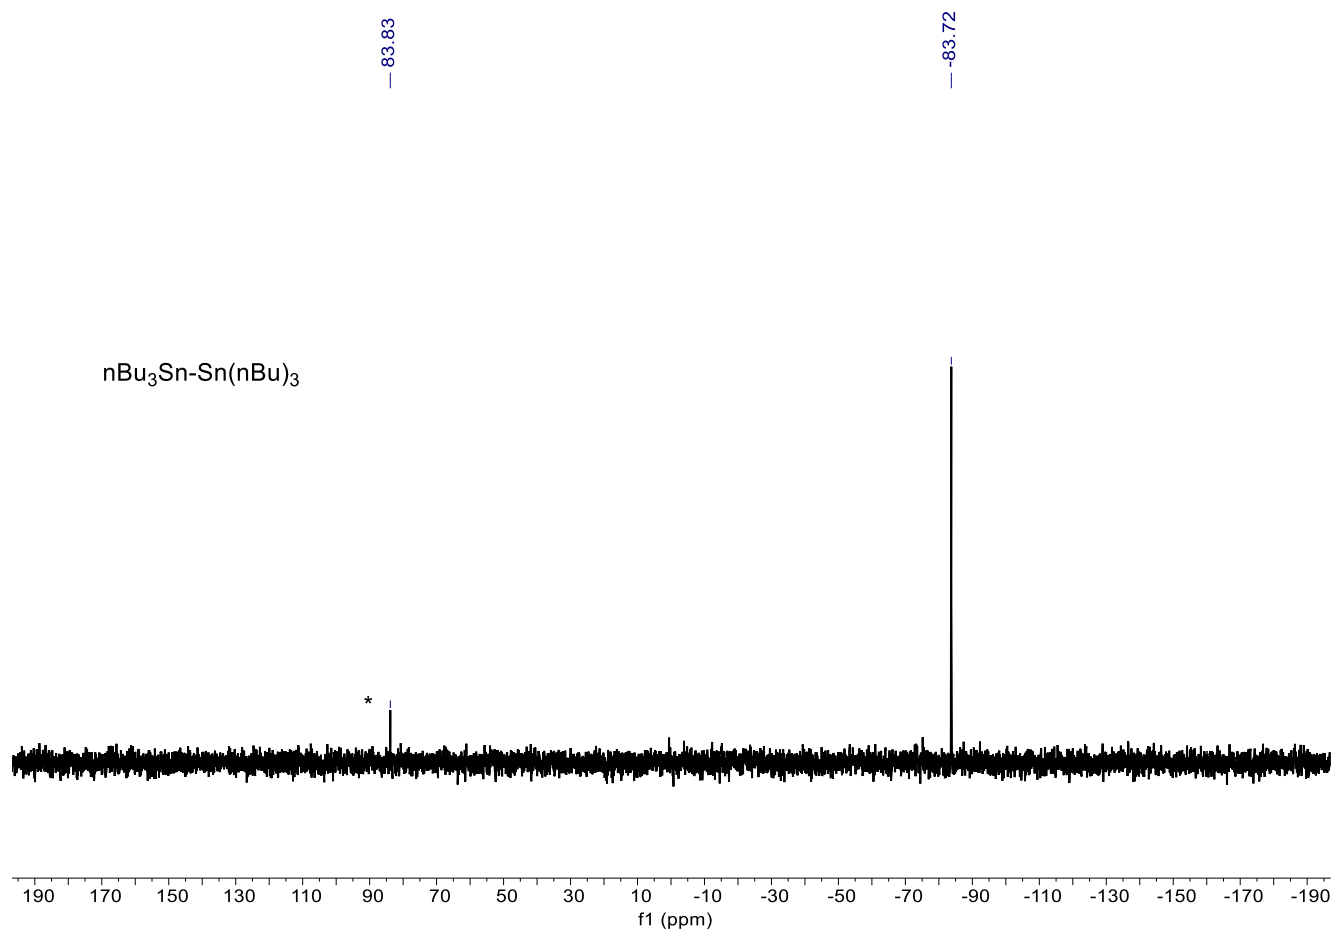

**Supplementary Figure 20.**  $^{119}\text{Sn}\{^1\text{H}\}$  NMR of nBu<sub>6</sub>Sn<sub>2</sub> in C<sub>6</sub>D<sub>6</sub> (\*: unknow impurity)

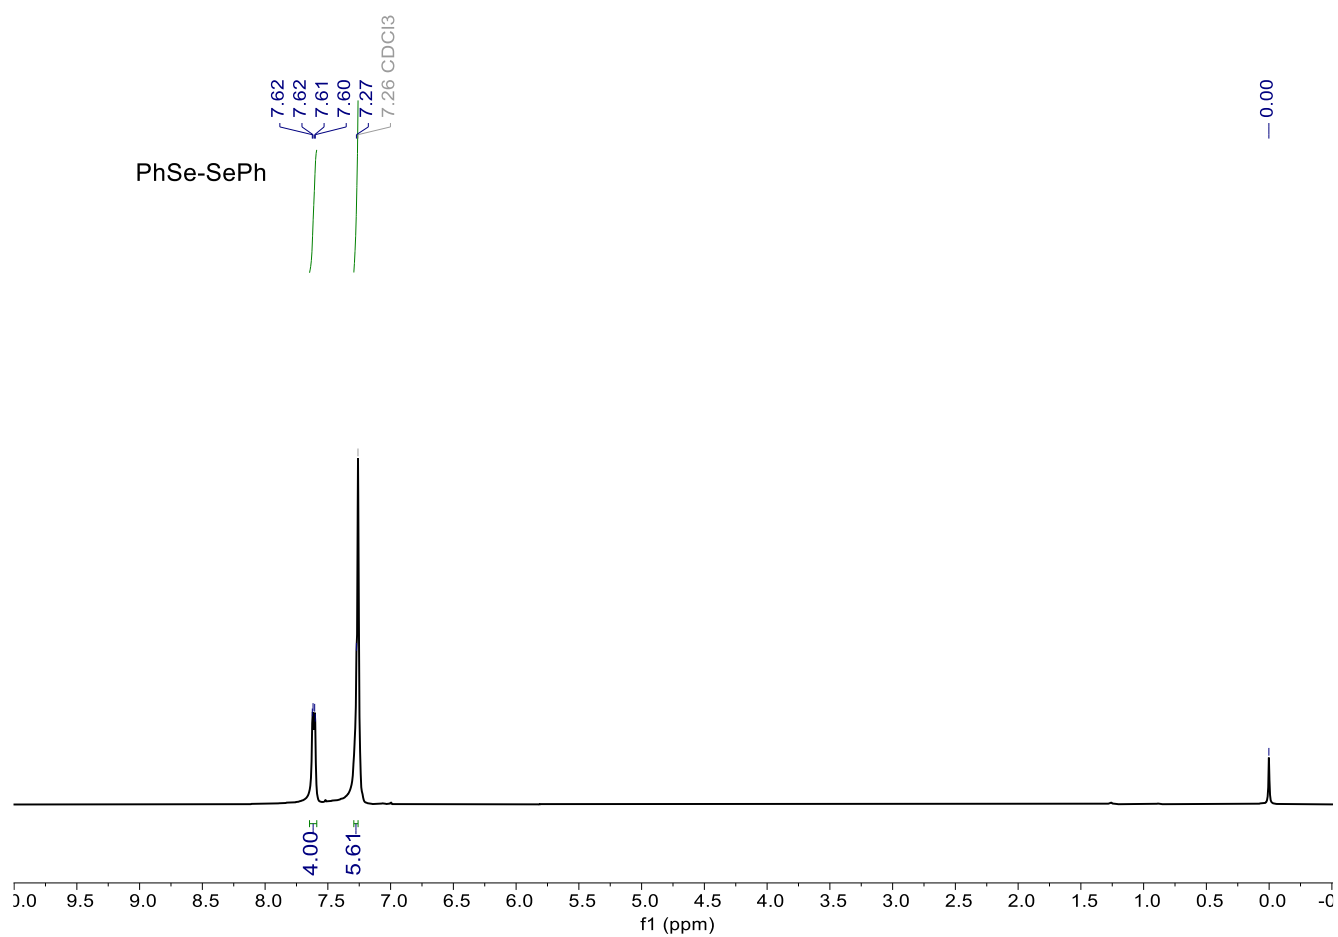

**Supplementary Figure 21.**  $^1\text{H}$  NMR of  $\text{Ph}_2\text{Se}_2$  in  $\text{CDCl}_3$

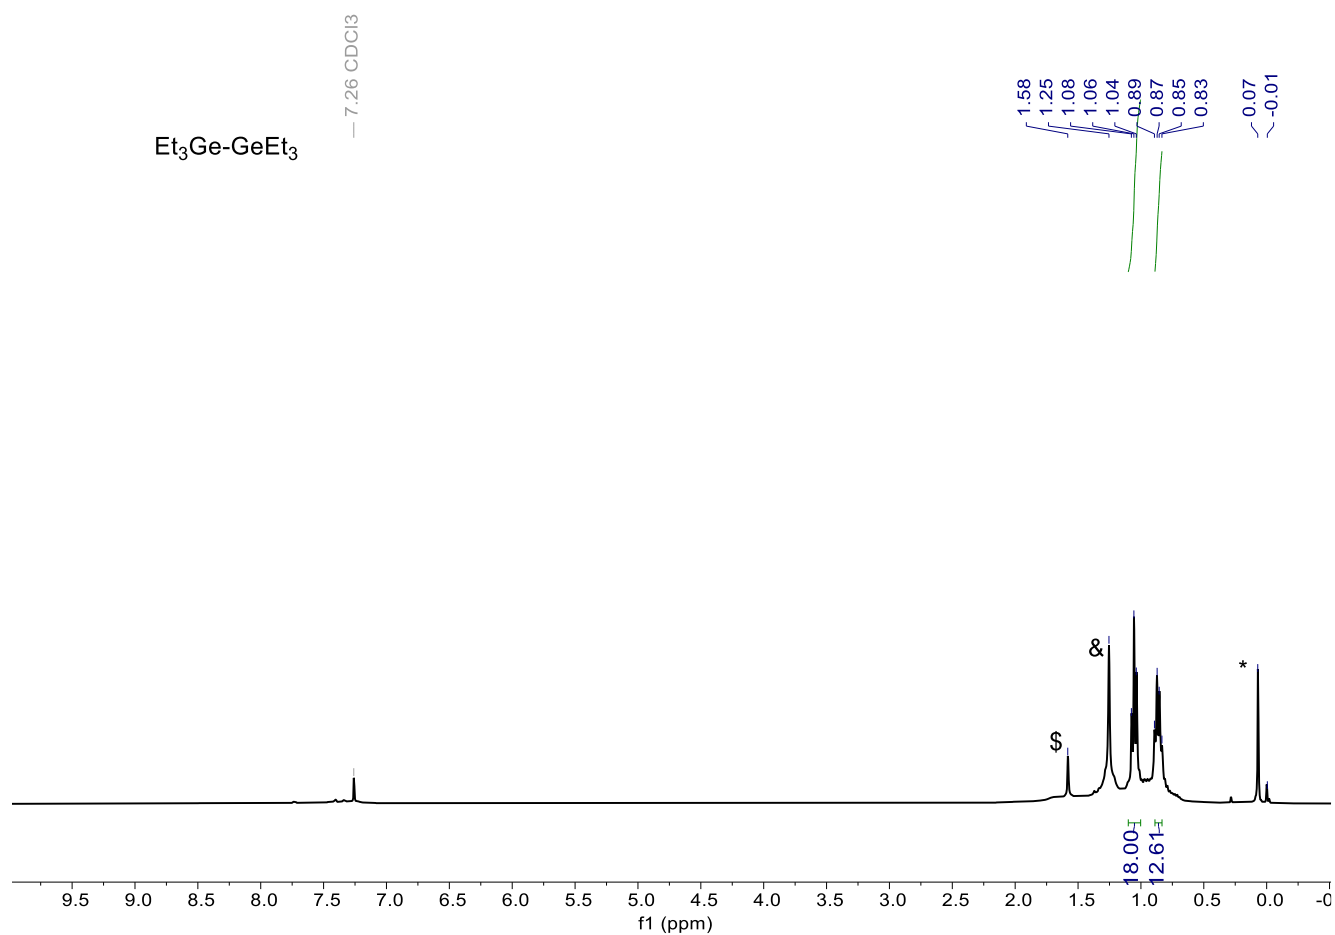

**Supplementary Figure 22.** <sup>1</sup>H NMR of Et<sub>6</sub>Ge<sub>2</sub> in CDCl<sub>3</sub> (\*: silicone grease from SPS purified n-hexane; &: H grease; \$: water from deuterated solvent)

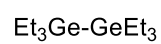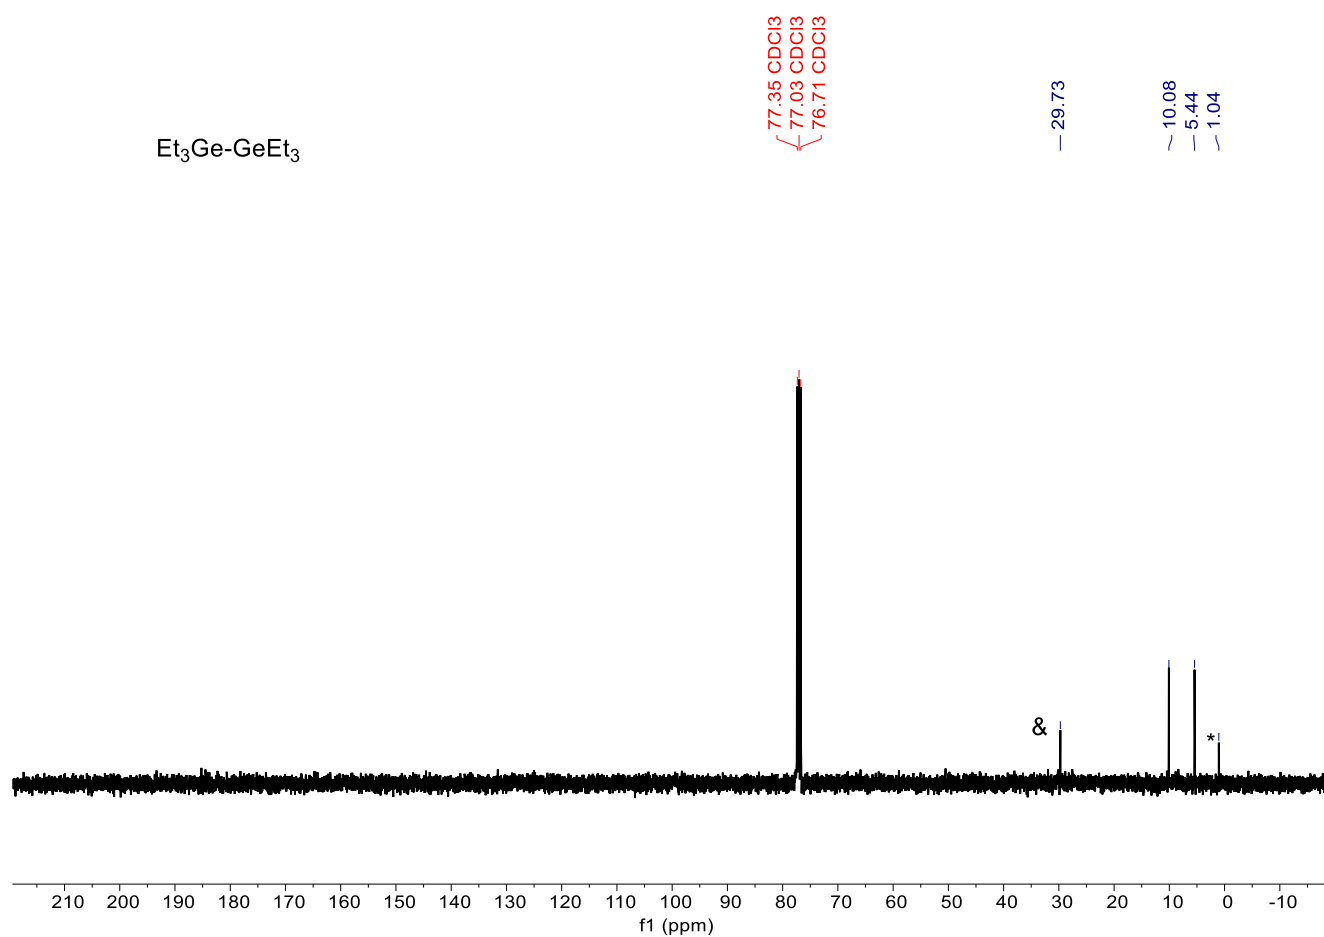

**Supplementary Figure 23.**  $^{13}\text{C}\{^1\text{H}\}$  NMR of  $\text{Et}_6\text{Ge}_2$  in  $\text{CDCl}_3$ (\*: silicone grease from SPS purified n-hexane; &: H grease)

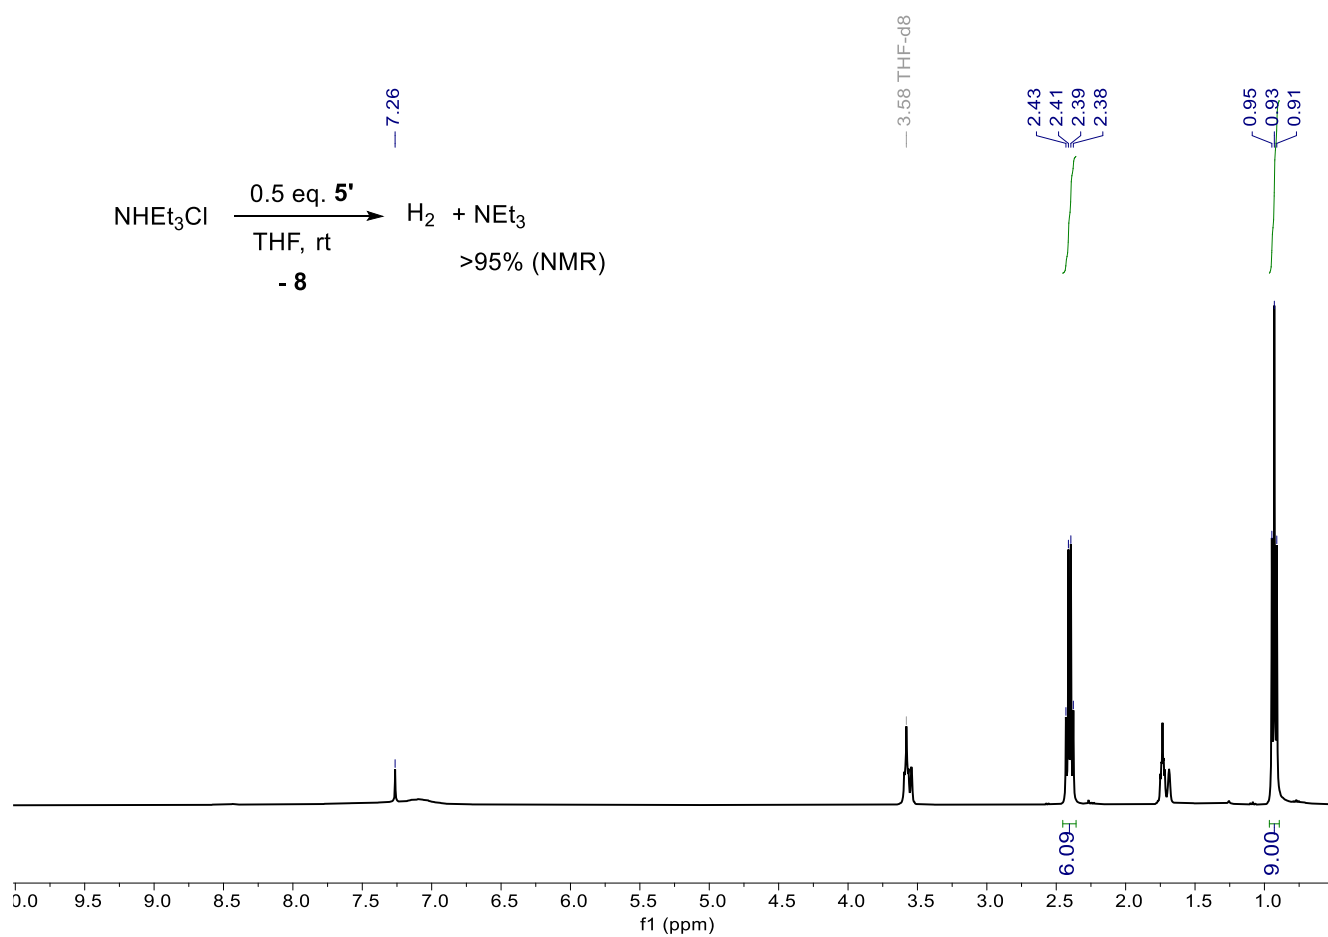

**Supplementary Figure 24.**  $^1\text{H}$  NMR of  $\text{NHEt}_3\text{Cl}$  reactions in THF- $\text{d}_8$

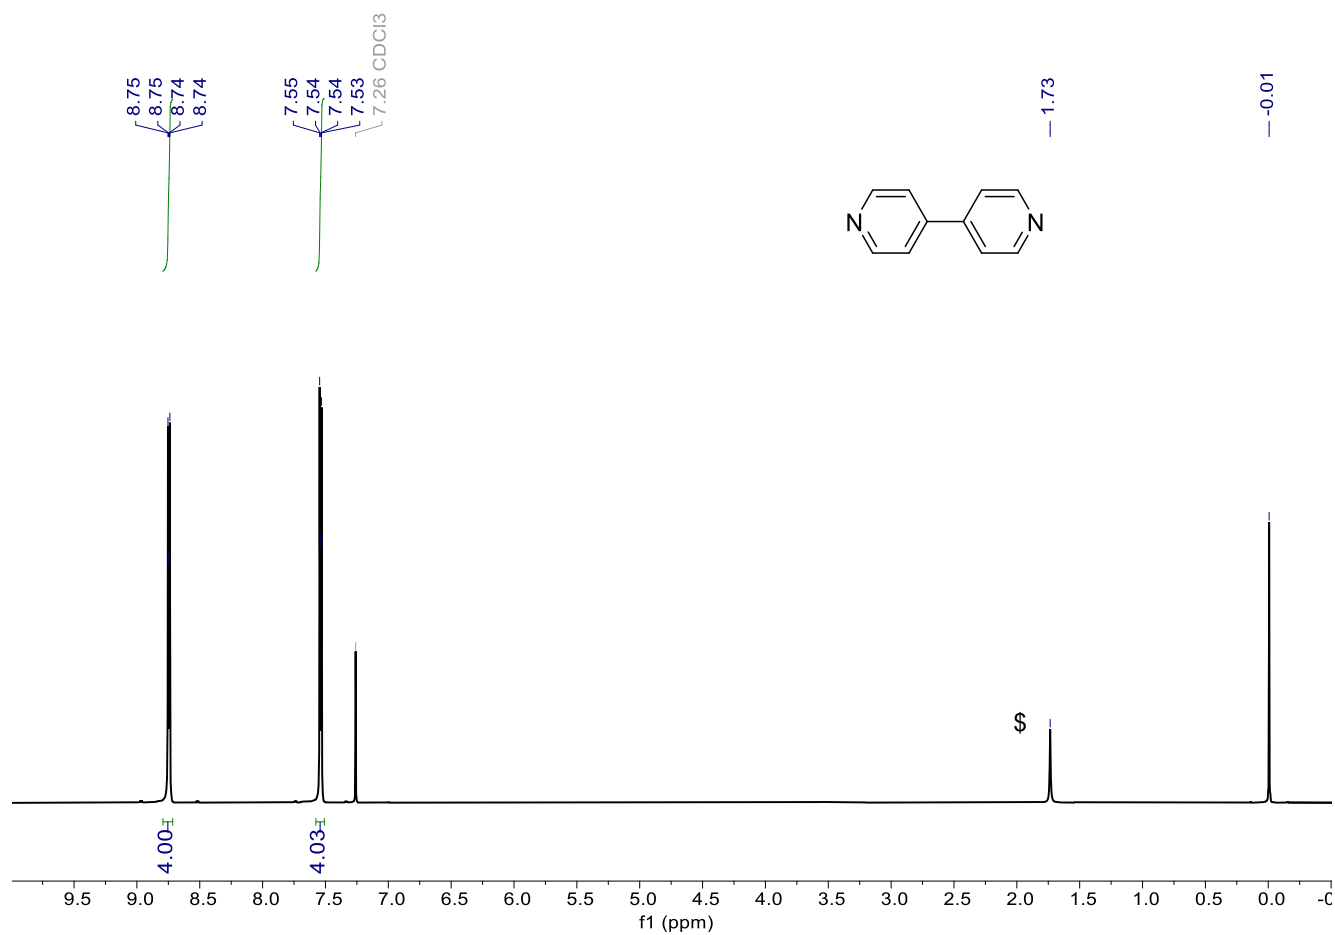

**Supplementary Figure 25.** <sup>1</sup>H NMR of 4,4'-bipyridine in CDCl<sub>3</sub> (\$: water from deuterated solvent)

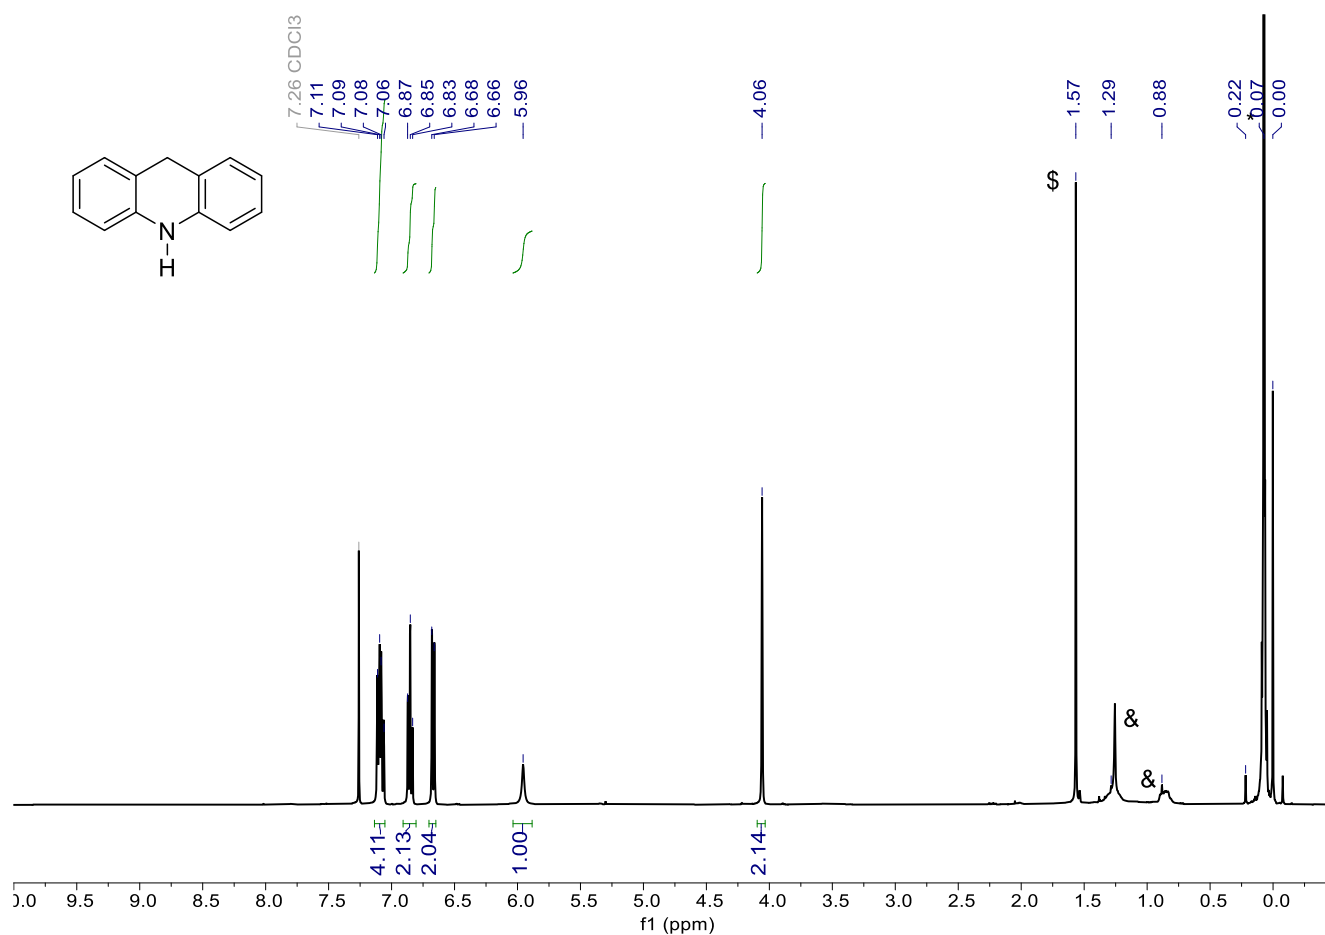

**Supplementary Figure 26.** <sup>1</sup>H NMR of Acridan in CDCl<sub>3</sub> (\*: silicone grease from SPS purified n-hexane; &: H grease; \$: water from deuterated solvent)

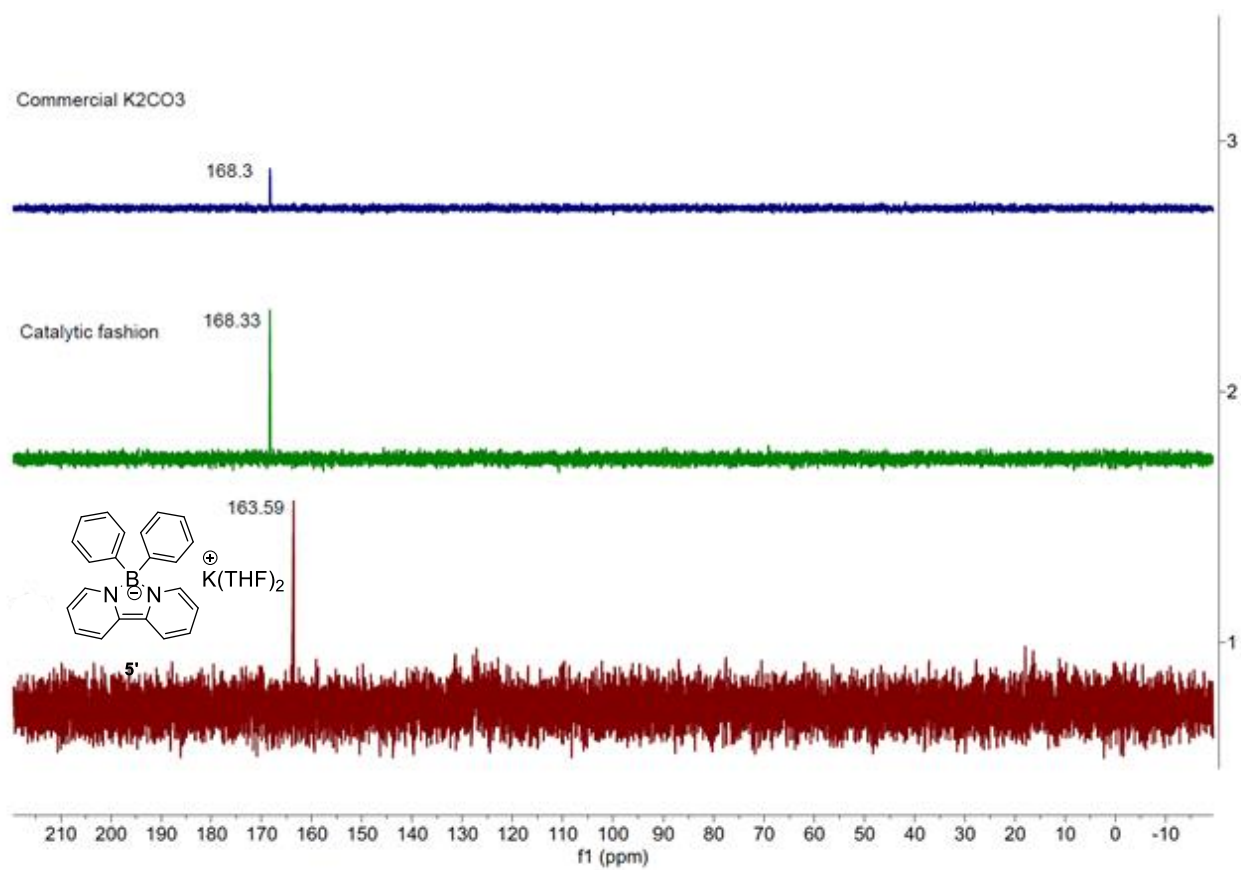

**Supplementary Figure 27.**  $^{13}\text{C}\{^1\text{H}\}$  NMR of CO<sub>2</sub> reactions in D<sub>2</sub>O

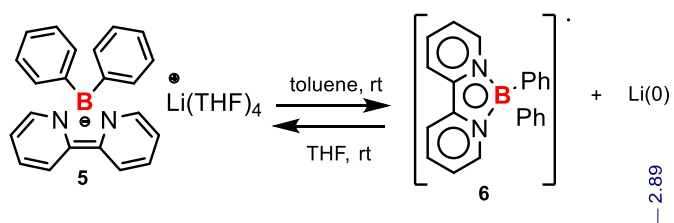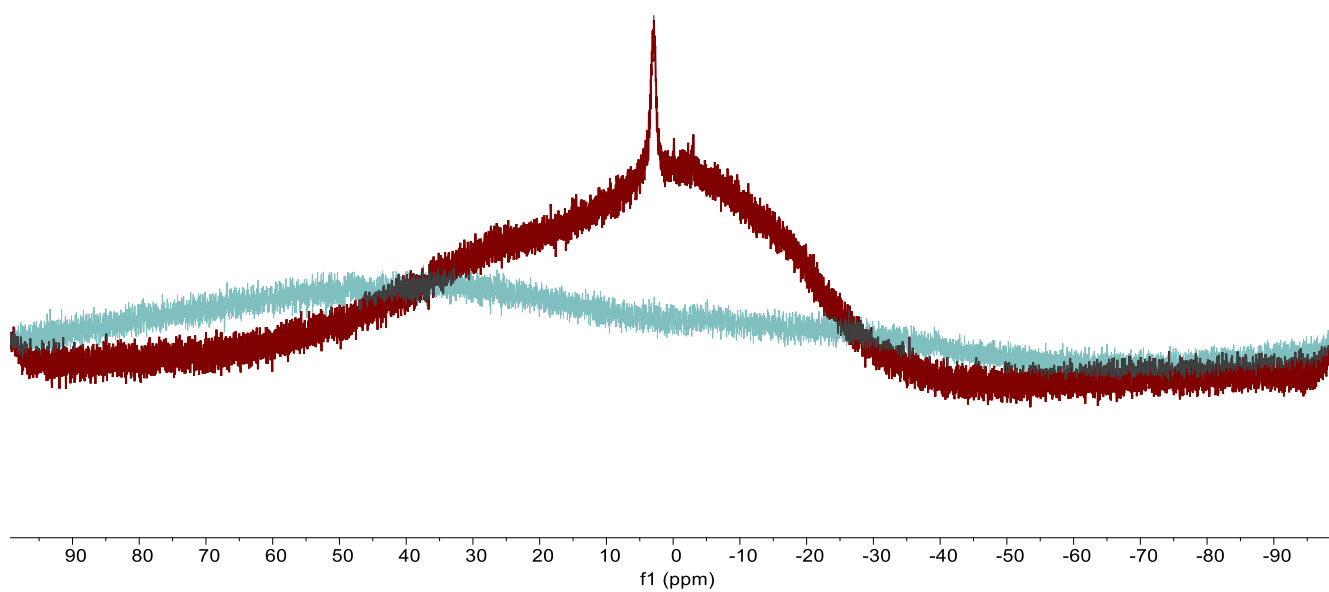

**Supplementary Figure 28.**  $^{11}\text{B}$  NMR of **5** in toluene/THF. Blue: toluene (EPR active); Red: removal of toluene and add THF.

Gas Chromatography

Gas products were analyzed by online gas chromatography (GC2060).

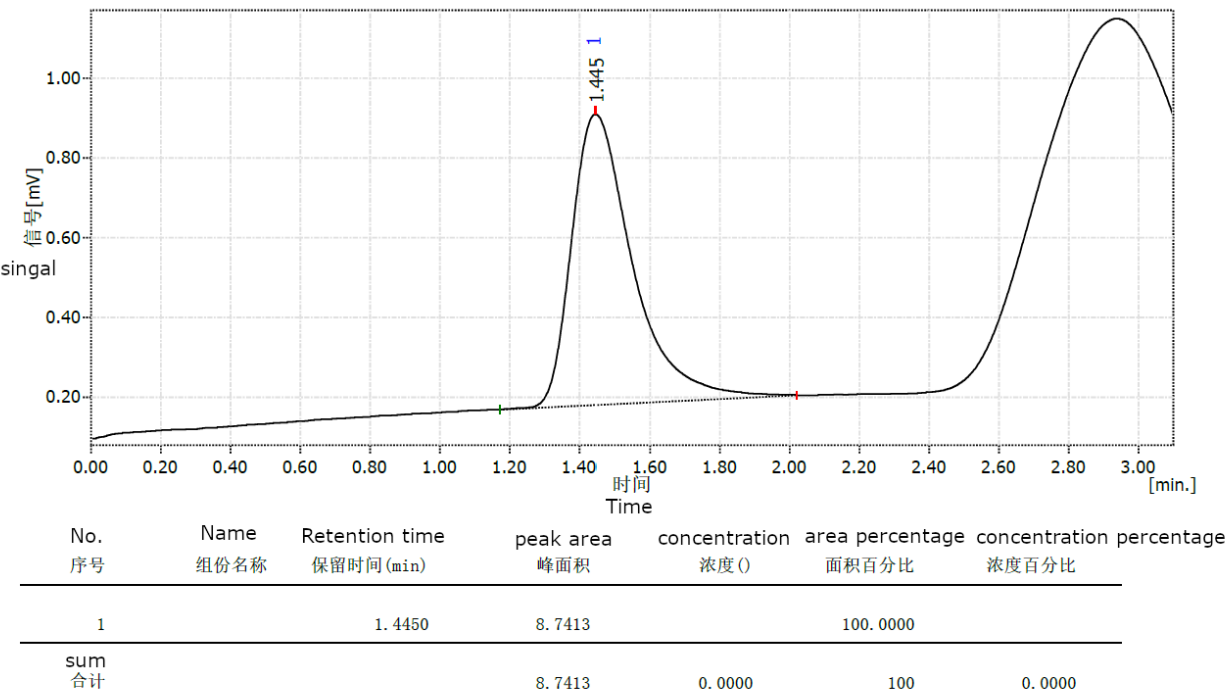

Supplementary Figure 29. GC spectra of  $\text{NHEt}_3\text{Cl}$  reaction.

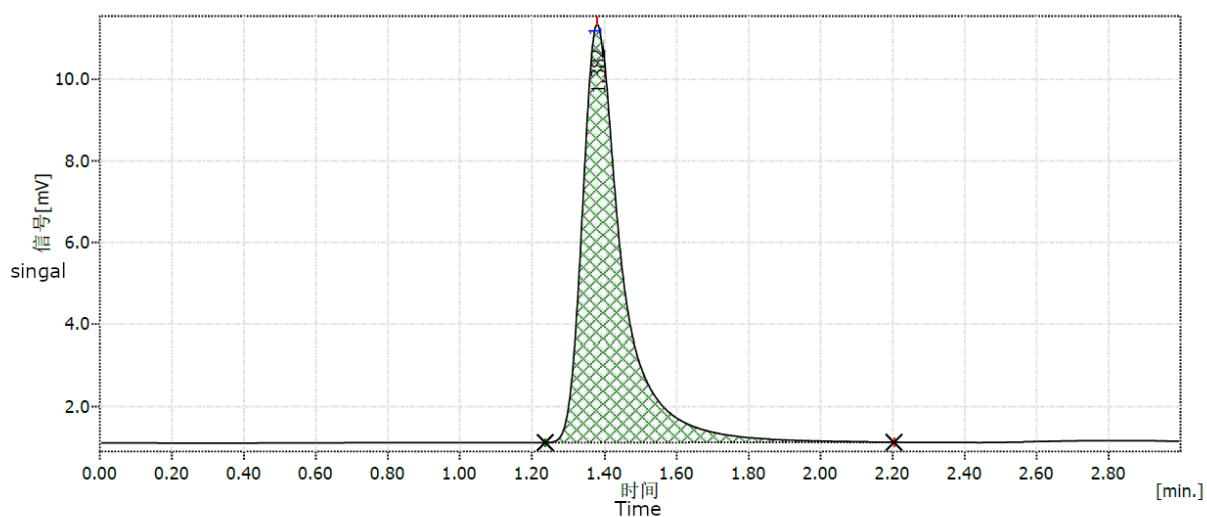

| No.<br>序号 | Name<br>组份名称 | Retention time<br>保留时间 (min) | peak area<br>峰面积 | concentration<br>浓度 (%) | area percentage<br>面积百分比 | concentration percentage<br>浓度百分比 |
|-----------|--------------|------------------------------|------------------|-------------------------|--------------------------|-----------------------------------|
| 1         |              | 1.3817                       | 77.9071          |                         | 100.0000                 |                                   |
| sum<br>合计 |              |                              | 77.9071          | 0.0000                  | 100                      | 0.0000                            |

**Supplementary Figure 30.** GC spectra of pure  $\text{H}_2$ .

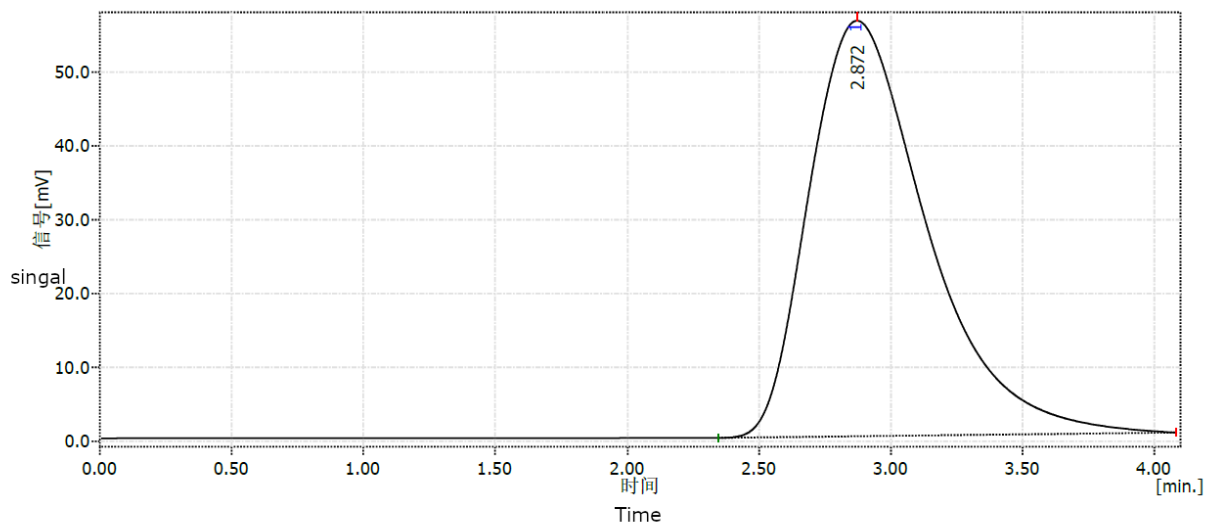

| No.<br>序号 | Name<br>组份名称 | Retention time<br>保留时间 (min) | peak area<br>峰面积 | concentration<br>浓度 (%) | area percentage<br>面积百分比 | concentration percentage<br>浓度百分比 |
|-----------|--------------|------------------------------|------------------|-------------------------|--------------------------|-----------------------------------|
| 1         |              | 2.8717                       | 1751.7290        | 0.0000                  | 0.0000                   |                                   |
| sum<br>合计 |              |                              | 1751.7290        | 0.0000                  | 100                      | 0.0000                            |

**Supplementary Figure 31.** GC spectra of pure Air of the lab.

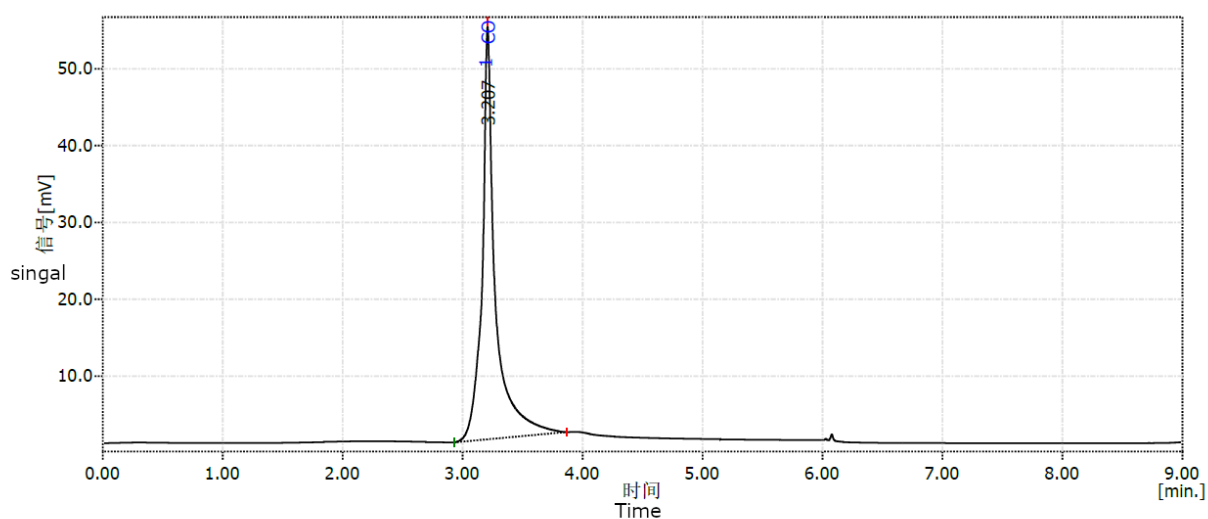

| No.<br>序号 | Name<br>组份名称 | Retention time<br>保留时间 (min) | peak area<br>峰面积 | concentration<br>浓度 (%) | area percentage<br>面积百分比 | concentration percentage<br>浓度百分比 |
|-----------|--------------|------------------------------|------------------|-------------------------|--------------------------|-----------------------------------|
| 1         | CO           | 3. 2067                      | 411. 8424        | 0. 1663                 | 100. 0000                | 100. 0000                         |
| sum<br>合计 |              |                              | 411. 8424        | 0. 1663                 | 100                      | 1. 0000                           |

**Supplementary Figure 32.** GC spectra of CO<sub>2</sub> reactions(5').

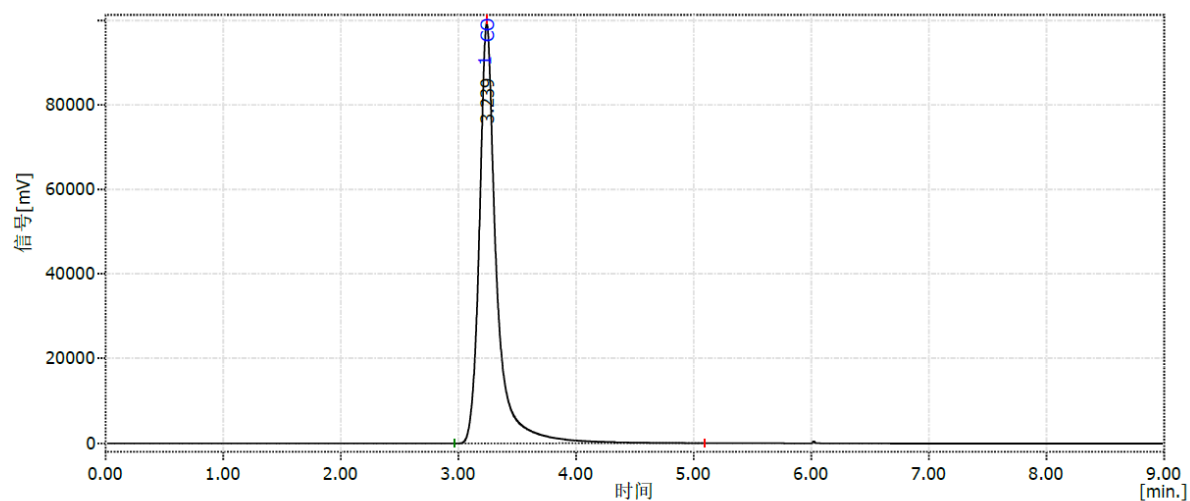

| 序号 | 组份名称 | 保留时间 (min) | 峰面积          | 浓度 ()    | 面积百分比    | 浓度百分比    |
|----|------|------------|--------------|----------|----------|----------|
| 1  | CO   | 3.2392     | 1008521.0000 | 407.3193 | 100.0000 | 100.0000 |
| 合计 |      |            | 1008521.0000 | 407.3193 | 100      | 1.0000   |

**Supplementary Figure 33.** GC spectra of pure CO.

## Cyclic Voltammetry

Cyclic voltammetry (CV) was tested using CH instruments CHI660 electrochemical workstation. All experiments were carried out under an atmosphere of argon in the three-electrode cell (glassy carbon used as working electrode, platinum wire electrode used as counter electrode, and silver electrode used as reference electrode) with anhydrous THF solution containing 0.1 M [nBu<sub>4</sub>N][PF<sub>6</sub>] (dried over 3 Å molecular sieves for one week before test). Ferrocene/ferrocenium couple was used as an internal standard.

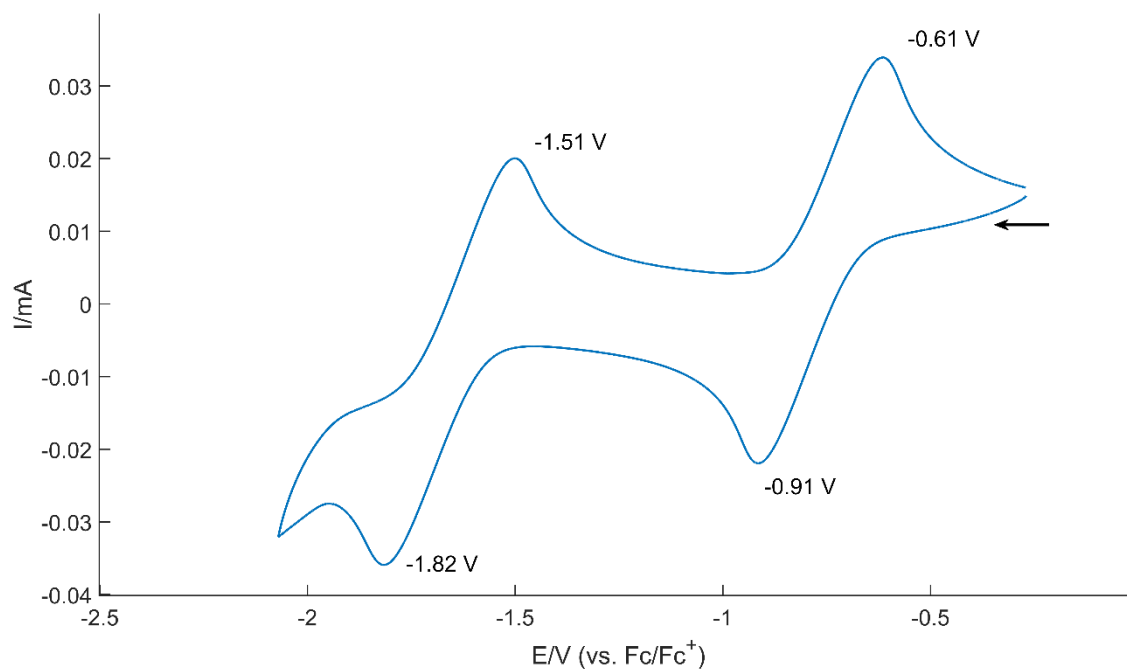

**Supplementary Figure 34** Cyclic voltammograms (CVs) of **6** in THF solution containing 0.1 M [nBu<sub>4</sub>N][PF<sub>6</sub>] at room temperature (scan rate: 100 mV/s).

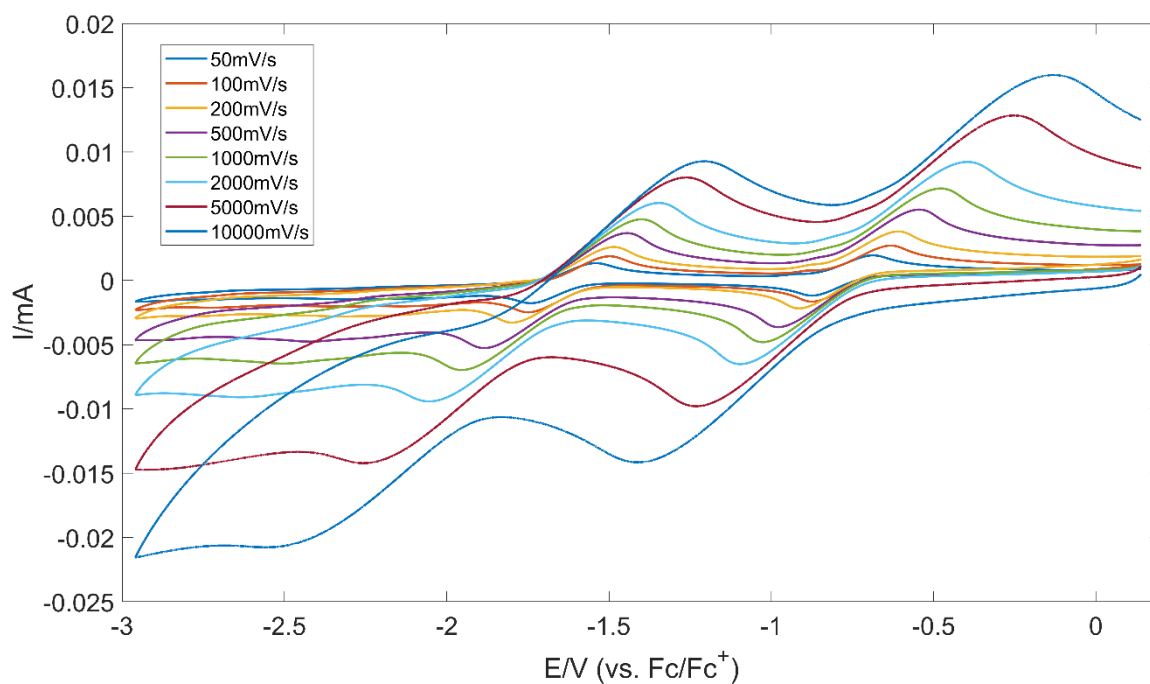

**Supplementary Figure 35** Cyclic voltammograms (CVs) of **6** in THF solution containing 0.1 M [nBu<sub>4</sub>N][PF<sub>6</sub>] at room temperature with different scan rates.

## EPR Spectroscopy

EPR spectra were acquired on ADANI SPINSCAN X EPR Spectrometer. All samples were prepared and tested under argon conditions. Easyspin (5.2.35)<sup>[7]</sup> was used to simulate the spectra. Microwave frequency was 9.450400 GHz, and power was 14.581mW.

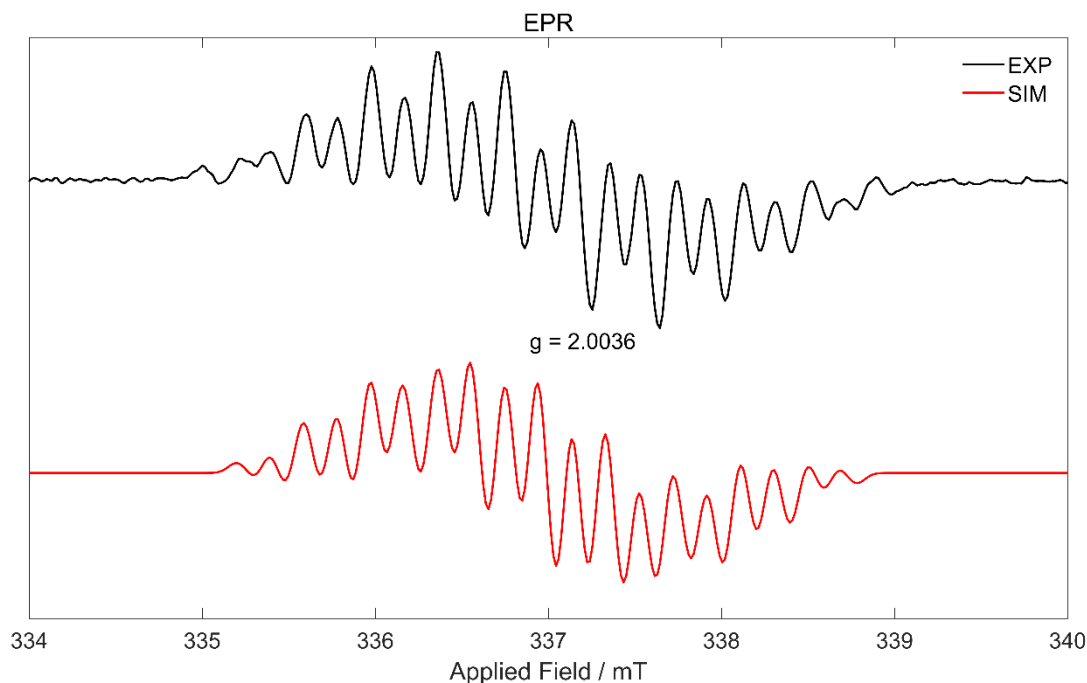

**Supplementary Figure 36.** EPR spectra of compound **6** in toluene solution at room temperature, ( $^{11}\text{B}$ )/( $^{10}\text{B}$ ) = 4/1,  $a(^{10}\text{B}) = 0.05$  G,  $a(^{11}\text{B}) = 0.16$  G,  $a(^{14}\text{N}) = 3.57$  G,  $a(^1\text{H}) = 1.01, 7.77, 8.89, 10.77$  G).

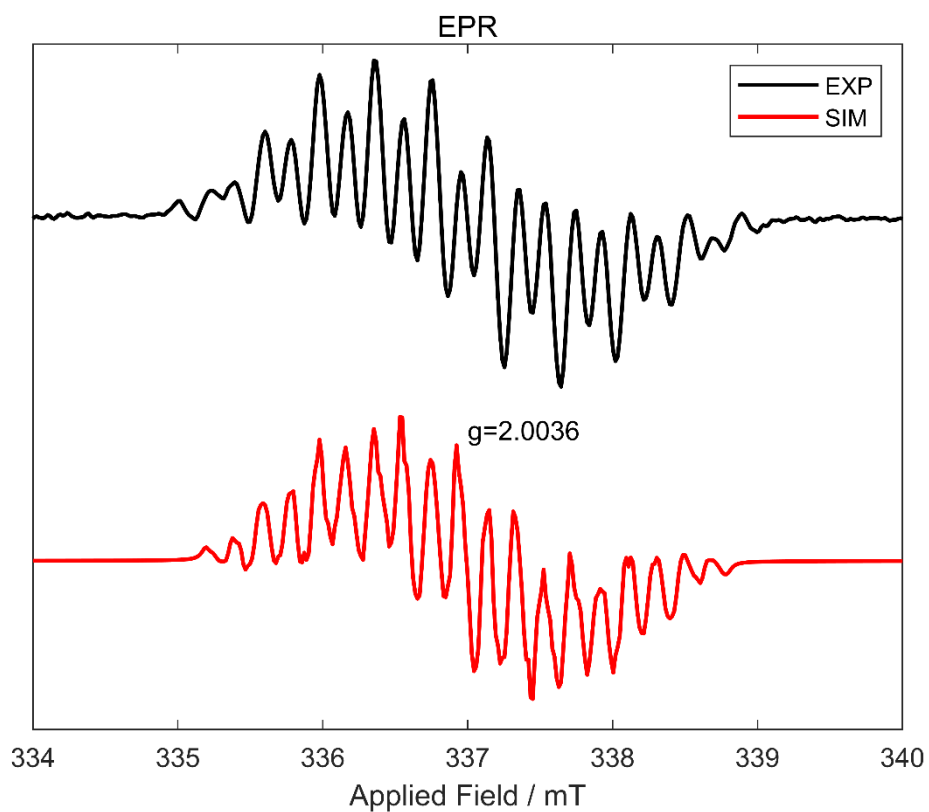

**Supplementary Figure 37.** EPR spectra of compound **6** in toluene solution at room temperature,  $a(^{11}\text{B}) = 0.22$  G,  $a(^{14}\text{N}) = 3.58$  G,  $a(^1\text{H}) = 1.01, 7.77, 8.89, 10.77$  G).

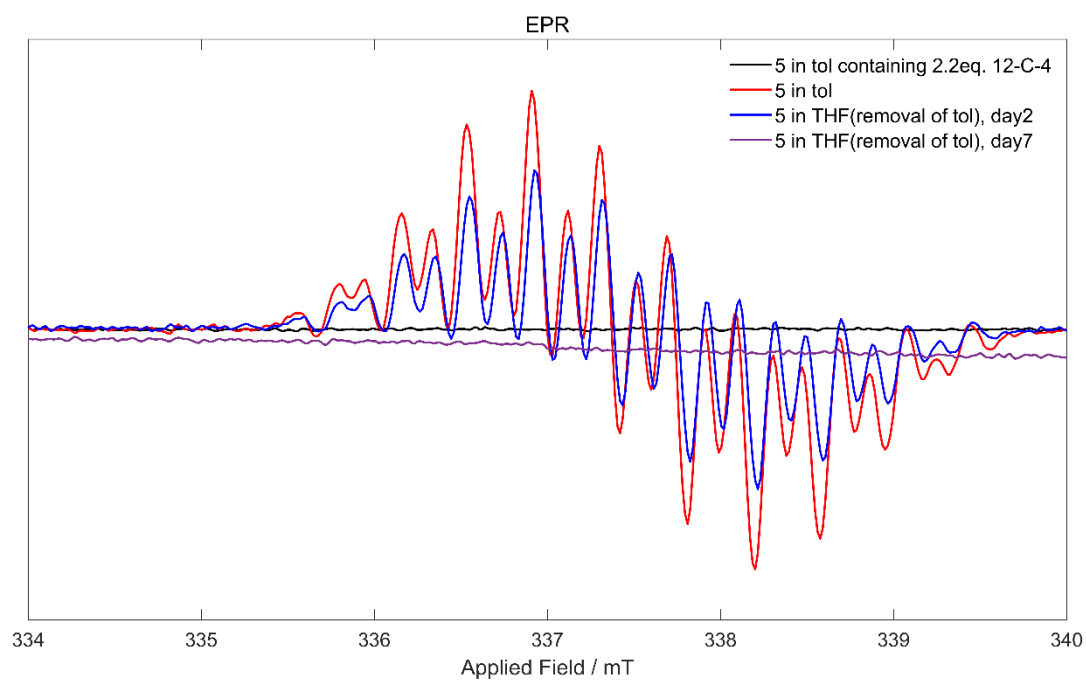

**Supplementary Figure 38.** EPR spectra of control experiments.

## Powder XRD Analysis

Powder XRD Analysis was acquired on Bruker D2 Phaser. The sample was prepared as follows: during the synthesis of [(bipy)BPh<sub>2</sub>] (**6**), the insoluble black solids were collected and washed with THF (6 mL) and dried under a fine vacuum as grey powder. Samples were stored in argon and quickly tested in air. High-intensity peaks appeared at  $2\theta = 32.50^\circ, 36.20^\circ$  were in good agreement with the reported data of lithium powder.<sup>[8]</sup>

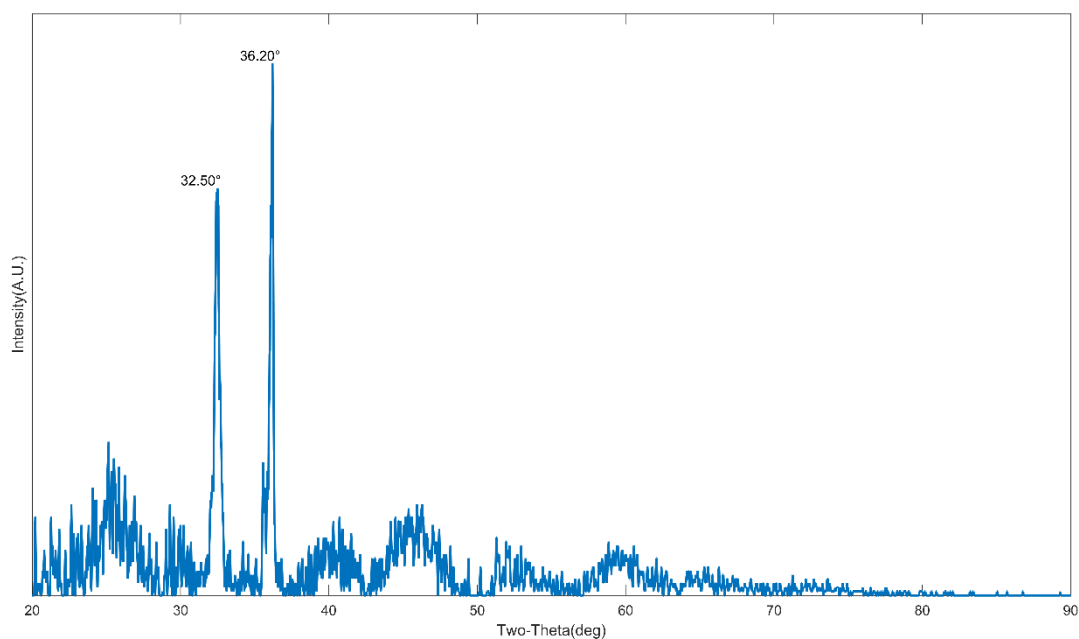

**Supplementary Figure 39.** Powder XRD of the residue formed in the synthesis of **6** confirmed as Li(0).

## X-ray photoelectron spectroscopy (XPS)

XPS Analysis was acquired on Thermo Scientific K-Alpha.

Sample Exp. was prepared as follows: during the synthesis of [(bipy)BPh<sub>2</sub>] (**6**), the insoluble black solids were collected and washed with THF (6 mL) and dried under a fine vacuum as grey powder.

Sample Cml. was from Sigma-Aldrich 499811-100G, Lithium granular, 99% trace metals basis.

Sample Exp. + Cml. was a mixture of Sample Exp. and Sample Cml.

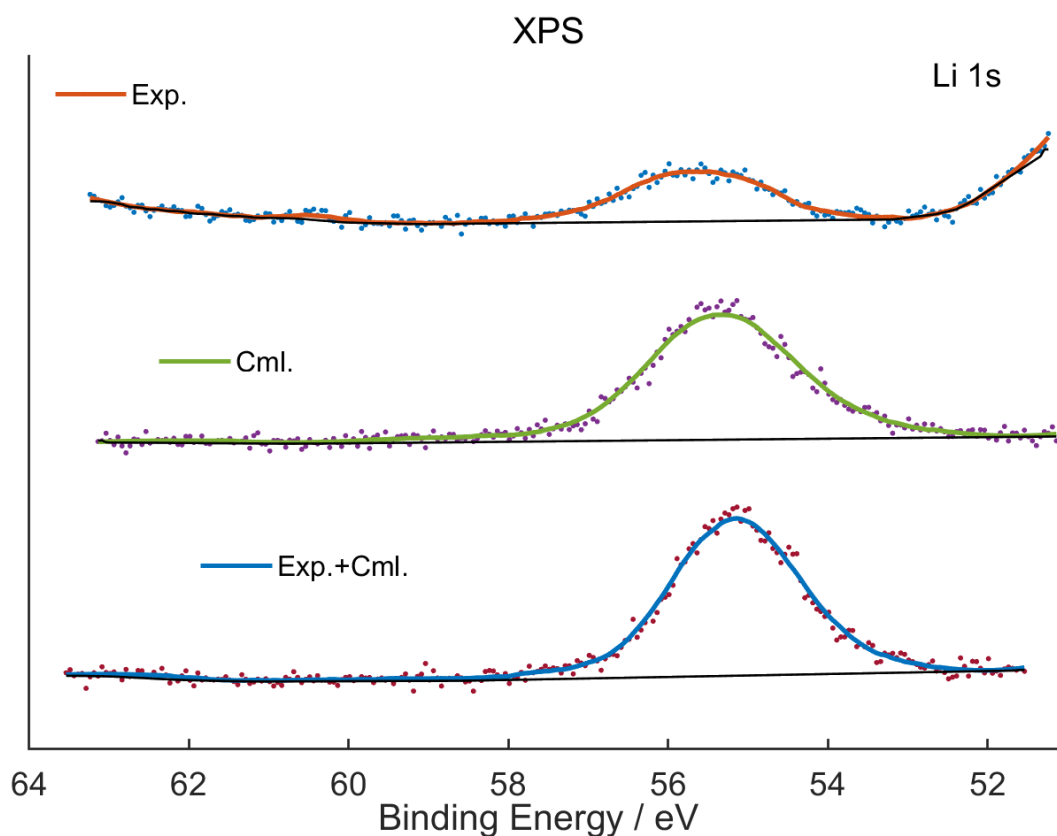

**Supplementary Figure 40.** XPS results. Binding Energy was referred to C1s = 284.8 eV.

### Sample Exp.:

| Name | Start BE   | Peak BE | End BE | Height   | CPS  | FWHM eV | Area (P) | CPS.eV | Area (N) | Atomic % | Peak Type | Q | SF    |
|------|------------|---------|--------|----------|------|---------|----------|--------|----------|----------|-----------|---|-------|
| TXFN | Background |         |        |          |      |         |          |        |          |          |           |   |       |
| C1s  | 298.03     | 283.64  | 279.13 | 23161.95 | 2.24 | 62374.5 | 873.99   | 73.13  | Standard | 1        | 1         | 1 | Smart |
| Li1s | 62.03      | 54.42   | 50.13  | 641.26   | 2.11 | 1599.41 | 321.05   | 26.87  | Standard | 1        | 0.061     | 1 | Smart |

### Sample Cml.:

| Name | Start BE   | Peak BE | End BE | Height   | CPS  | FWHM eV  | Area (P) | CPS.eV | Area (N) | Atomic % | Peak Type | Q | SF    |
|------|------------|---------|--------|----------|------|----------|----------|--------|----------|----------|-----------|---|-------|
| TXFN | Background |         |        |          |      |          |          |        |          |          |           |   |       |
| C1s  | 298.03     | 283.74  | 279.13 | 32835.63 | 1.31 | 63488.48 | 889.65   | 51.45  | Standard | 1        | 1         | 1 | Smart |
| Li1s | 62.03      | 54.32   | 50.13  | 1723.78  | 1.74 | 4183.27  | 839.66   | 48.55  | Standard | 1        | 0.061     | 1 | Smart |

### Sample Exp. + Cml.:

| Name | Start BE   | Peak BE | End BE | Height   | CPS  | FWHM eV  | Area (P) | CPS.eV | Area (N) | Atomic % | Peak Type | Q | SF    |
|------|------------|---------|--------|----------|------|----------|----------|--------|----------|----------|-----------|---|-------|
| TXFN | Background |         |        |          |      |          |          |        |          |          |           |   |       |
| C1s  | 298.03     | 283.34  | 279.13 | 28731.32 | 1.3  | 59023.32 | 826.87   | 48     | Standard | 1        | 1         | 1 | Smart |
| Li1s | 62.03      | 53.73   | 50.13  | 2091.28  | 1.73 | 4464.37  | 895.79   | 52     | Standard | 1        | 0.061     | 1 | Smart |

## ICP-OES Study

Inductively Coupled Plasma Optical Emission spectroscopy (ICP-OES) was recorded using The OPTima 8000 spectrometer.

### 1. Detection of $\text{Li}^+$

The sample was collected from the following reaction. The insoluble black solids were collected, washed with THF (6 mL), and dried under a fine vacuum as grey powder. Compound **5** (1.5 mg) was quenched with deionized water (1 mL).

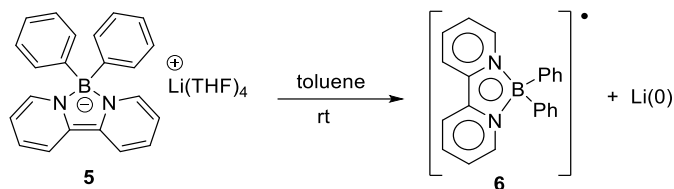

#### Replicate Data: DL

| Repl# | Analyte    | Net Intensity | Corrected Intensity | Calib. Conc. Units | Sample Conc. Units | Analysis Time |
|-------|------------|---------------|---------------------|--------------------|--------------------|---------------|
| 1     | Li 670.784 | 8537604.9     | 8533058.4           | 0.4205 mg/L        | 0.4205 mg/L        | 4:35:48 PM    |
| 2     | Li 670.784 | 8512449.5     | 8507903.0           | 0.4193 mg/L        | 0.4193 mg/L        | 4:35:53 PM    |
| 3     | Li 670.784 | 8399849.0     | 8395302.5           | 0.4137 mg/L        | 0.4137 mg/L        | 4:35:55 PM    |
| 4     | Li 670.784 | 8357615.5     | 8353069.0           | 0.4116 mg/L        | 0.4116 mg/L        | 4:35:57 PM    |
| 5     | Li 670.784 | 8633311.1     | 8628764.6           | 0.4252 mg/L        | 0.4252 mg/L        | 4:36:00 PM    |
| 6     | Li 670.784 | 8680005.7     | 8675459.2           | 0.4275 mg/L        | 0.4275 mg/L        | 4:36:02 PM    |
| 7     | Li 670.784 | 8377892.9     | 8373346.4           | 0.4126 mg/L        | 0.4126 mg/L        | 4:36:05 PM    |
| 8     | Li 670.784 | 8659146.1     | 8654599.6           | 0.4265 mg/L        | 0.4265 mg/L        | 4:36:07 PM    |
| 9     | Li 670.784 | 8538119.2     | 8533572.7           | 0.4205 mg/L        | 0.4205 mg/L        | 4:36:10 PM    |
| 10    | Li 670.784 | 8307158.2     | 8302611.6           | 0.4091 mg/L        | 0.4091 mg/L        | 4:36:12 PM    |

#### Mean Data: DL

| Analyte    | Mean Corrected Intensity | Calib. Conc. Units | Std.Dev. | Sample Conc. Units | Std.Dev. | RSD   |
|------------|--------------------------|--------------------|----------|--------------------|----------|-------|
| Li 670.784 | 8495768.7                | 0.4187 mg/L        | 0.00659  | 0.4187 mg/L        | 0.00659  | 1.57% |

#### Replicate Data: DI water

| Repl# | Analyte    | Net Intensity | Corrected Intensity | Calib. Conc. Units | Sample Conc. Units | Analysis Time |
|-------|------------|---------------|---------------------|--------------------|--------------------|---------------|
| 1     | Li 670.784 | 53758.9       | 49212.4             | 0.0024 mg/L        | 0.0024 mg/L        | 3:57:51 PM    |
| 2     | Li 670.784 | 51944.1       | 47397.5             | 0.0023 mg/L        | 0.0023 mg/L        | 3:57:59 PM    |
| 3     | Li 670.784 | 52052.6       | 47506.0             | 0.0023 mg/L        | 0.0023 mg/L        | 3:58:06 PM    |

#### Mean Data: DI water

| Analyte    | Mean Corrected Intensity | Calib. Conc. Units | Std.Dev. | Sample Conc. Units | Std.Dev. | RSD   |
|------------|--------------------------|--------------------|----------|--------------------|----------|-------|
| Li 670.784 | 48038.7                  | 0.0024 mg/L        | 0.00005  | 0.0024 mg/L        | 0.00005  | 2.12% |

#### Replicate Data: sample A (dil x500)

| Repl# | Analyte    | Net Intensity | Corrected Intensity | Calib. Conc. Units | Sample Conc. Units | Analysis Time |
|-------|------------|---------------|---------------------|--------------------|--------------------|---------------|
| 1     | Li 670.784 | 26196851.4    | 26192304.9          | 1.2907 mg/L        | 1.2907 mg/L        | 4:02:17 PM    |
| 2     | Li 670.784 | 25743718.2    | 25739171.7          | 1.2684 mg/L        | 1.2684 mg/L        | 4:02:21 PM    |
| 3     | Li 670.784 | 25737772.4    | 25733225.9          | 1.2681 mg/L        | 1.2681 mg/L        | 4:02:24 PM    |

#### Mean Data: sample A (dil x500)

| Analyte    | Mean Corrected Intensity | Calib. Conc. Units | Std.Dev. | Sample Conc. Units | Std.Dev. | RSD |
|------------|--------------------------|--------------------|----------|--------------------|----------|-----|
| Li 670.784 | 25737772.4               | 1.2681 mg/L        | 1.2681   | 1.2681 mg/L        | 1.2681   |     |

Li 670.784      25888234.2      1.2757 mg/L      0.01298      1.2757 mg/L      0.01298      1.02%

Lithium metal account: 1.2757 mg/ L \* 500 \* 1 mL = 0.64 mg

Lithium metal percentage in the grey powder: 42.6 %

## 2. Detection of K<sup>+</sup>

The sample was collected from the following reaction.

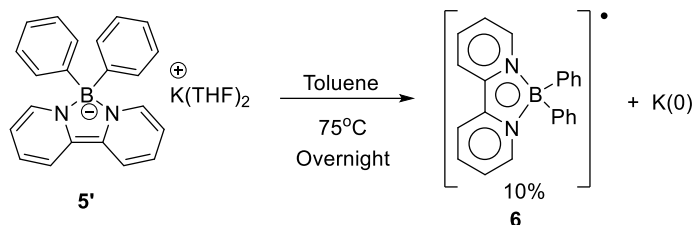

Compound (**5'**) (35 mg, 0.070 mmol) was suspended in toluene (10 mL) at room temperature. The mixture was heated without stirring at 75°C overnight. The color of the toluene solution turned dark green. After filtration, the toluene solution was collected, and all the volatile was removed under a high vacuum, affording compound **6** (2.3 mg, 10%). The residue was then washed with THF (6 mL). The residue and funnel were quenched with 1 mL of deionized water and washed with 9 mL of deionized water. (collected 10 mL in total).

### Replicate Data: DL

| Repl# | Analyte   | Net Intensity | Corrected Intensity | Calib. Conc. Units | Sample Conc. Units | Analysis Time |
|-------|-----------|---------------|---------------------|--------------------|--------------------|---------------|
| 1     | K 766.490 | 405069.8      | 395250.0            | 0.5903 mg/L        | 0.5903 mg/L        | 4:33:16 PM    |
| 2     | K 766.490 | 400559.0      | 390739.3            | 0.5836 mg/L        | 0.5836 mg/L        | 4:33:20 PM    |
| 3     | K 766.490 | 404626.6      | 394806.8            | 0.5897 mg/L        | 0.5897 mg/L        | 4:33:23 PM    |
| 4     | K 766.490 | 409786.8      | 399967.0            | 0.5974 mg/L        | 0.5974 mg/L        | 4:33:26 PM    |
| 5     | K 766.490 | 406449.5      | 396629.7            | 0.5924 mg/L        | 0.5924 mg/L        | 4:33:29 PM    |
| 6     | K 766.490 | 396852.5      | 387032.7            | 0.5781 mg/L        | 0.5781 mg/L        | 4:33:31 PM    |
| 7     | K 766.490 | 409078.5      | 399258.7            | 0.5963 mg/L        | 0.5963 mg/L        | 4:33:34 PM    |
| 8     | K 766.490 | 406574.5      | 396754.7            | 0.5926 mg/L        | 0.5926 mg/L        | 4:33:37 PM    |
| 9     | K 766.490 | 401793.2      | 391973.5            | 0.5855 mg/L        | 0.5855 mg/L        | 4:33:40 PM    |
| 10    | K 766.490 | 403980.1      | 394160.3            | 0.5887 mg/L        | 0.5887 mg/L        | 4:33:43 PM    |

### Mean Data: DL

| Analyte   | Mean Corrected Intensity | Calib. Conc. Units | Std.Dev. | Sample Conc. Units | Std.Dev. | RSD   |
|-----------|--------------------------|--------------------|----------|--------------------|----------|-------|
| K 766.490 | 394657.3                 | 0.5895 mg/L        | 0.00587  | 0.5895 mg/L        | 0.00587  | 1.00% |

### Replicate Data: DI water

| Repl# | Analyte   | Net Intensity | Corrected Intensity | Calib. Conc. Units | Sample Conc. Units | Analysis Time |
|-------|-----------|---------------|---------------------|--------------------|--------------------|---------------|
| 1     | K 766.490 | 21176.9       | 11357.2             | 0.0170 mg/L        | 0.0170 mg/L        | 2:38:12 PM    |
| 2     | K 766.490 | 20934.1       | 11114.3             | 0.0166 mg/L        | 0.0166 mg/L        | 2:38:18 PM    |
| 3     | K 766.490 | 20786.0       | 10966.2             | 0.0164 mg/L        | 0.0164 mg/L        | 2:38:25 PM    |

### Mean Data: DI water

| Analyte   | Mean Corrected Intensity | Calib. Conc. Units | Std.Dev. | Sample Conc. Units | Std.Dev. | RSD   |
|-----------|--------------------------|--------------------|----------|--------------------|----------|-------|
| K 766.490 | 11145.9                  | 0.0166 mg/L        | 0.00029  | 0.0166 mg/L        | 0.00029  | 1.77% |

### Replicate Data: Sample A

| Repl# | Analyte   | Net Intensity | Corrected Intensity | Calib. Conc. Units | Sample Conc. Units | Analysis Time |
|-------|-----------|---------------|---------------------|--------------------|--------------------|---------------|
| 1     | K 766.490 | 6540856.8     | 6531037.0           | 9.7548 mg/L        | 9.7548 mg/L        | 2:40:45 PM    |
| 2     | K 766.490 | 6539110.5     | 6529290.7           | 9.7522 mg/L        | 9.7522 mg/L        | 2:40:48 PM    |

3 K 766.490 6743331.4 6733511.6 10.057 mg/L 10.057 mg/L 2:40:50 PM

-----  
Mean Data: Sample A

|           | Mean Corrected | Calib.      |          | Sample      |          |       |
|-----------|----------------|-------------|----------|-------------|----------|-------|
| Analyte   | Intensity      | Conc. Units | Std.Dev. | Conc. Units | Std.Dev. | RSD   |
| K 766.490 | 6597946.5      | 9.8547 mg/L | 0.17536  | 9.8547 mg/L | 0.17536  | 1.78% |

Potassium metal account:  $9.8547 \text{ mg/L} * 10 * 1 \text{ mL} = 0.099 \text{ mg}$

## Crystallographic Details

Crystallographic details of **7·DCM**, **6** and **5**

|                                              | <b>7·DCM</b>                                                      | <b>6</b>                                        | <b>5</b>                                                         |
|----------------------------------------------|-------------------------------------------------------------------|-------------------------------------------------|------------------------------------------------------------------|
| Empirical Formula                            | C <sub>23</sub> H <sub>20</sub> BCl <sub>4</sub> CuN <sub>2</sub> | C <sub>22</sub> H <sub>18</sub> BN <sub>2</sub> | C <sub>38</sub> H <sub>50</sub> BLiN <sub>2</sub> O <sub>4</sub> |
| Formula Weight                               | 540.56                                                            | 321.19                                          | 616.55                                                           |
| Temperature (K)                              | 203(2)                                                            | 193(2)                                          | 213(2)                                                           |
| Crystal System                               | Triclinic                                                         | Triclinic                                       | Monoclinic                                                       |
| Space Group                                  | P-1                                                               | P-1                                             | P21                                                              |
| a (Å)                                        | 8.9711(8)                                                         | 8.9948(3)                                       | 10.5613(3)                                                       |
| b (Å)                                        | 11.2052(10)                                                       | 9.1299(4)                                       | 15.5054(5)                                                       |
| c (Å)                                        | 12.5573(10)                                                       | 12.3211(5)                                      | 11.0474(4)                                                       |
| $\alpha$ (°)                                 | 100.954(3)                                                        | 73.978(2)                                       | 90                                                               |
| $\beta$ (°)                                  | 103.460(3)                                                        | 78.431(2)                                       | 93.193(2)                                                        |
| $\gamma$ (°)                                 | 95.983(3)                                                         | 61.804(2)                                       | 90                                                               |
| Volume (Å <sup>3</sup> )                     | 1190.60(18)                                                       | 854.18(6)                                       | 1806.28(10)                                                      |
| Z                                            | 2                                                                 | 2                                               | 2                                                                |
| $\rho_{\text{calc}}$ (g/cm <sup>3</sup> )    | 1.508                                                             | 1.249                                           | 1.134                                                            |
| Absorption Coefficient (mm <sup>-1</sup> )   | 1.380                                                             | 0.073                                           | 0.560                                                            |
| F(000)                                       | 548                                                               | 338                                             | 664                                                              |
| Crystal Size (mm <sup>3</sup> )              | 0.32 x 0.21 x 0.03                                                | 0.33 x 0.15 x 0.04                              | 0.25 x 0.15 x 0.03                                               |
| Radiation/Å                                  | 0.71073                                                           | 0.71073                                         | 0.71073                                                          |
| $\Theta$ range for data collection (°)       | 2.240 to 26.418                                                   | 2.578 to 26.420                                 | 4.008 to 74.640                                                  |
| Index Ranges                                 | -11 ≤ h ≤ 11<br>-13 ≤ k ≤ 13<br>-15 ≤ l ≤ 15                      | -11 ≤ h ≤ 11<br>-9 ≤ k ≤ 11<br>-15 ≤ l ≤ 15     | -13 ≤ h ≤ 13<br>-19 ≤ k ≤ 18<br>-13 ≤ l ≤ 13                     |
| Reflections Collected                        | 13299                                                             | 6039                                            | 31596                                                            |
| Independent Reflections                      | 4841 [R(int) = 0.0803]                                            | 3455 [R(int) = 0.0452]                          | 7051 [R(int) = 0.0447]                                           |
| Reflections with $I > 2\sigma(I)$            | 2860                                                              | 2114                                            | 6535                                                             |
| Completeness / $\Theta$ full                 | 0.994                                                             | 0.982                                           | 0.999                                                            |
| Data/Restraints/Parameters                   | 4841 / 0 / 283                                                    | 3455 / 0 / 226                                  | 7051 / 967 / 559                                                 |
| Goodness-of-fit on F <sup>2</sup>            | 1.022                                                             | 1.016                                           | 1.055                                                            |
| Final R indexes [ $I > 2\sigma(I)$ ]         | R1 = 0.0699<br>wR2 = 0.1592                                       | R1 = 0.0561<br>wR2 = 0.1139                     | R1 = 0.0471<br>wR2 = 0.1305                                      |
| Final R indexes [all data]                   | R1 = 0.1253<br>wR2 = 0.1945                                       | R1 = 0.1069<br>wR2 = 0.1466                     | R1 = 0.0496<br>wR2 = 0.1340                                      |
| Largest diff. peak/hole (e Å <sup>-3</sup> ) | 1.503 and -1.249                                                  | 0.206 and -0.233                                | 0.157 and -0.167                                                 |
| CCDC number                                  | 2301616                                                           | 2301617                                         | 2301618                                                          |

## Computational Details

All calculations were carried out using ORCA (version 5.0.4).<sup>[9]</sup> Geometry optimization was performed at the density functional theory (DFT) using M062X<sup>[10]</sup> with a def2-TZVP<sup>[11]</sup> basis set. Counterions were omitted during calculations. The THF solution was modeled by the Conductor-like Polarizable Continuum Model (CPCM)<sup>[12]</sup> in optimization. Harmonic vibrational analyses were carried out to confirm if the optimized structure was a local minimum structure and to provide zero-point vibrational energy corrections and thermal corrections to various thermodynamic properties. Magnetic properties were calculated using revTPSS<sup>[13]</sup>/pcSseg-1<sup>[14]</sup> level of theory with optimized structures with the SMD solvent model.<sup>[15]</sup> ACID was calculated from AICD2.0 software.<sup>[16]</sup>

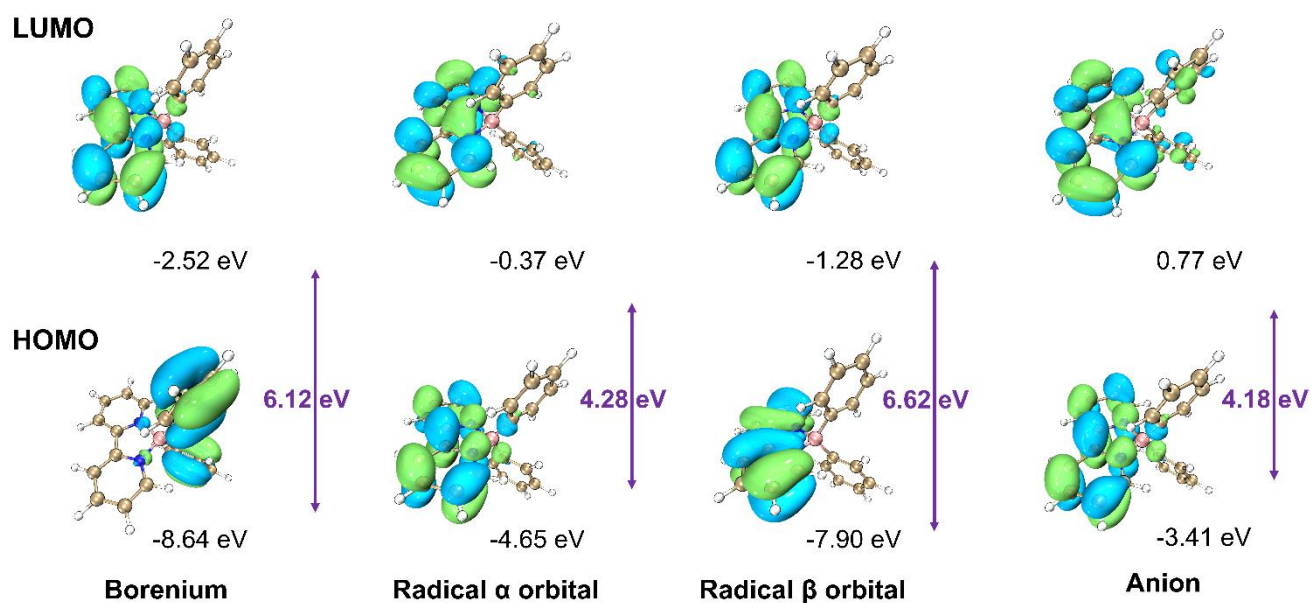

**Supplementary Figure 41.** Calculated LUMO and HOMO orbitals of boronium, boron radical, and boron anion (Isovalue: 0.03 a.u.).

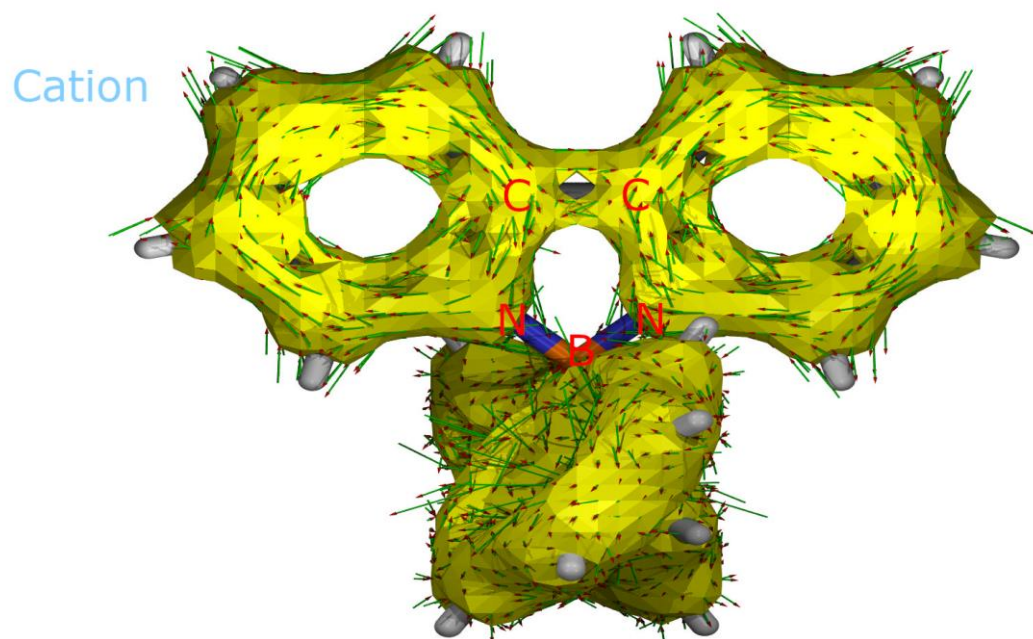

**Supplementary Figure 42.** AICD of boronium. The direction of magnetic field is perpendicular to the paper and point to the reader.

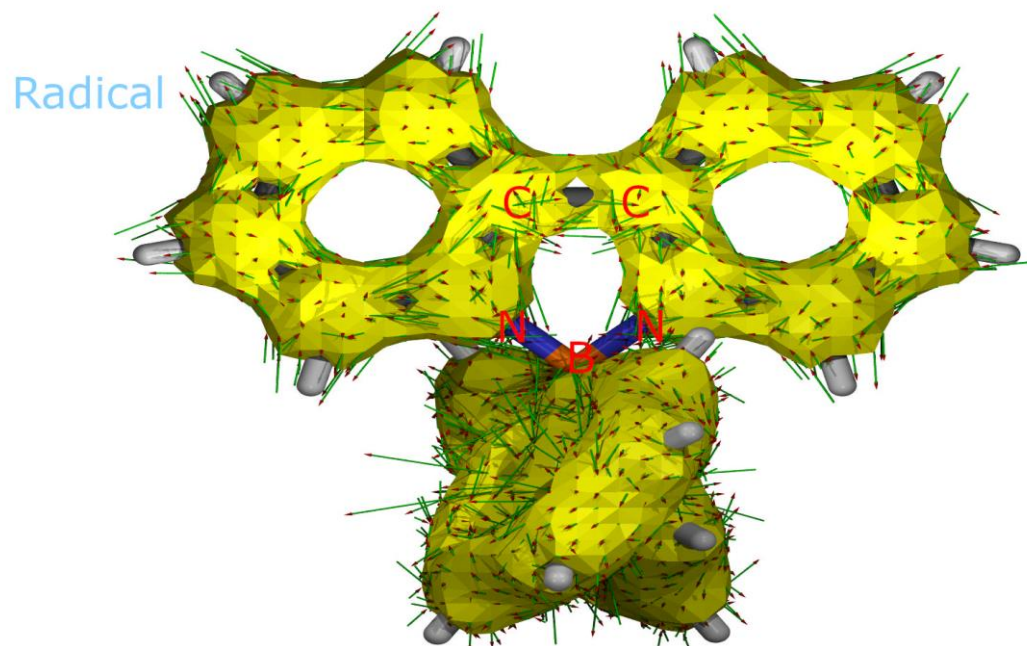

**Supplementary Figure 43.** AICD of radical. The direction of magnetic field is perpendicular to the paper and point to the reader.

Anion

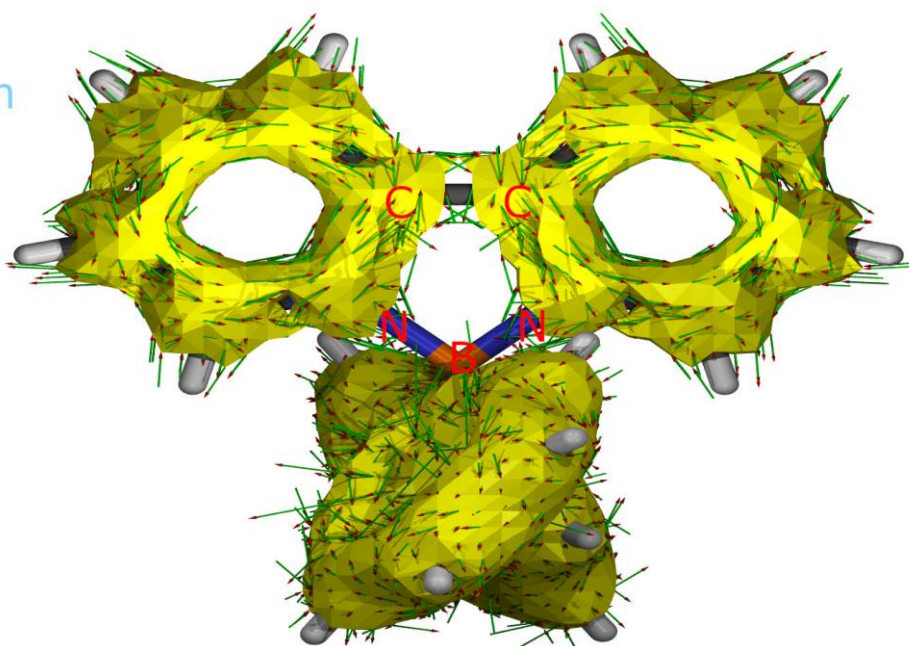

**Supplementary Figure 44.** AICD of anion. The direction of magnetic field is perpendicular to the paper and point to the reader.

A combination of computational and experimental methods was utilized to study the reduction of lithium.

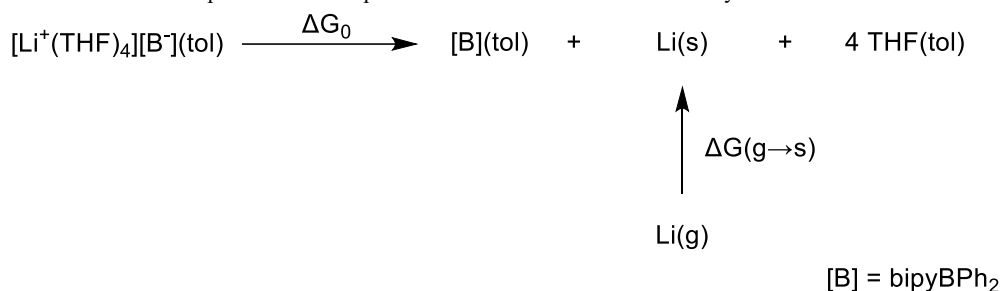

For the lithium decomposition reaction of compound **5**, total energy change could be obtained from the calculated Gibbs free energies,  $G\{\text{THF}(\text{tol})\}$ ,  $G\{[\text{B}](\text{tol})\}$ ,  $G\{[\text{Li}^+(\text{THF})_4][\text{B}^-](\text{tol})\}$  and  $G\{\text{Li}(\text{s})\}$ . To reduce the calculation error of a single atom, lithium gas to solid thermodynamic data were taken from the experimental results<sup>[17]</sup>.

Geometry optimization was performed at the density functional theory (DFT) using M062X<sup>[10]</sup> with a def2-TZVP<sup>[11]</sup> basis set. Counterions were omitted during calculations. The toluene solution was modeled by the Conductor-like Polarizable Continuum Model (CPCM)<sup>[12]</sup> in optimization. Harmonic vibrational analyses were carried out to confirm if the optimized structure was a local minimum structure and to provide zero-point vibrational energy corrections and thermal corrections to various thermodynamic properties. For higher accuracy of electronic energy, double hybrid DFT, and larger basis set, revDSD-PBEB86-D4<sup>[18]</sup>/ma-def2-QZVP<sup>[11]</sup> level of theory with optimized structures was carried out with the SMD solvent model.<sup>[15]</sup>

| <b>5</b> #1         | $\Delta G$ (kcal/mol) #2 | $\Delta H$ (kcal/mol) #2 |
|---------------------|--------------------------|--------------------------|
| Single molecule     | -26.21 (revDSD-PBEP86)   | -17.78 (revDSD-PBEP86)   |
|                     | 1.24 (M06-2X)            | -15.43 (M06-2X)          |
| Complete ionization | -51.82 (revDSD-PBEP86)   | -25.80 (revDSD-PBEP86)   |
|                     | -31.21 (M06-2X)          | -41.51 (M06-2X)          |

**#1:** It means how we considered the energy of Lithium borate anion in calculation. Single molecular means it was a single molecular ( $[\text{Li}^+(\text{THF})_4][\text{B}^-]$ ) in which the borate part and the lithium part were not ionized in toluene. Complete ionization means it was calculated in two parts, the borate part ( $[\text{B}^-]$ ) and the lithium part ( $[\text{Li}^+(\text{THF})_4]$ ) in toluene.

**#2:** DFT method used for electronic energy calculations.

Detailed calculated energies for each molecule are listed below in Hartree(h).

| Compound                                              | G (M062X)    | H(M062X)     | G (revDSD-PBEP86) | H (revDSD-PBEP86) |
|-------------------------------------------------------|--------------|--------------|-------------------|-------------------|
| THF(tol)                                              | -232.3464071 | -232.3129632 | -231.4634135      | -231.4299695      |
| $[\text{Li}^+(\text{THF})_4][\text{B}^-](\text{tol})$ | -1920.182959 | -1920.069231 | -1912.6061219     | -1912.492394      |
| $[\text{Li}^+(\text{THF})_4](\text{tol})$             | -936.8466343 | -936.7691602 | -933.2591693      | -933.1816953      |
| $[\text{B}](\text{tol})$                              | -983.2517569 | -983.1863109 | -979.2810932      | -979.2156473      |
| $[\text{B}^-](\text{tol})$                            | -983.3496272 | -983.2835549 | -979.3389644      | -979.272892       |
| Li(g)                                                 | -7.495325    | -7.4976869   | -7.4648688        | -7.4672293        |

And  $\Delta H \text{ Li}(\text{g} \rightarrow \text{s}) = -159.3 \text{ kJ/mol}$ ,  $S \text{ Li}(\text{g}) = 138.782 \text{ J/(mol}\cdot\text{K)}$  and  $S \text{ Li}(\text{s}) = 29.12 \text{ J/(mol}\cdot\text{K)}$  were obtained from the experimental results.<sup>17</sup>

The  $\Delta G$  revDSD-PBEP86 Single molecule in toluene can be obtained:

$$\begin{aligned} \Delta G (\text{kcal/mol}) &= G [\text{B}](\text{tol}) + G \text{ Li}(\text{g}) + 4 * G \text{ THF}(\text{tol}) + \Delta H \text{ Li}(\text{g} \rightarrow \text{s}) - (S \text{ Li}(\text{s}) - S \text{ Li}(\text{g})) - G [\text{Li}^+(\text{THF})_4][\text{B}^-](\text{tol}) \\ &= -979.2810932 \text{ h} + (-7.4648688 \text{ h}) + 4 * (-231.4634135 \text{ h}) + -159.3 / (627.51 * 4.18) \text{ h} - 298.15 * (29.12 - 138.782) / (627.51 * 4.18 * 1000) \text{ h} - (-1912.6061219 \text{ h}) \\ &= -0.041761 \text{ h} = -26.21 \text{ kcal/mol} \end{aligned}$$

Similarly,  $\Delta G$  revDSD-PBEP86 Complete ionization in toluene was calculated:

$$\begin{aligned} \Delta G (\text{kcal/mol}) &= G [\text{B}](\text{tol}) + G \text{ Li}(\text{g}) + 4 * G \text{ THF}(\text{tol}) + \Delta H \text{ Li}(\text{g} \rightarrow \text{s}) - (S \text{ Li}(\text{s}) - S \text{ Li}(\text{g})) - G [\text{Li}^+(\text{THF})_4](\text{tol}) - G [\text{B}^-](\text{tol}) \\ &= -979.2810932 \text{ h} + (-7.4648688 \text{ h}) + 4 * (-231.4634135 \text{ h}) + -159.3 / (627.51 * 4.18) \text{ h} - 298.15 * (29.12 - 138.782) / (627.51 * 4.18 * 1000) \text{ h} - (-933.2591693 \text{ h}) - (-979.3389644 \text{ h}) \\ &= -0.049749 \text{ h} = -31.21 \text{ kcal/mol} \end{aligned}$$

## Reactions of Scheme 6-8 using naphthalene anion as reducing reagents

Sodium naphthalene was freshly prepared from a mixture of naphthalene and sodium in THF at  $-35^{\circ}\text{C}$  (concentration was 0.1 mol/L). For E-E reactions, only P-P was formed with a 21% conversion. The Sn-Sn, Se-Se, and Ge-Ge coupling products were not observed. In the reductive coupling of pyridine, the formation of 4,4'-bipyridine was not observed. In the Birch reduction of Acridine, no desired products were observed.

### Sn-Sn coupling reactions:

To the  $\text{C}_6\text{D}_6$  solution of  $n\text{Bu}_3\text{SnCl}$  (6.5 mg, 0.02 mmol, 1.0 eq.) in J. Young's tube was added 200  $\mu\text{L}$  0.1M Sodium naphthalene (0.02 mmol, 1.0eq.). The reaction was placed at room temperature overnight. No Sn-Sn products were observed based on the  $^1\text{H}$  NMR.

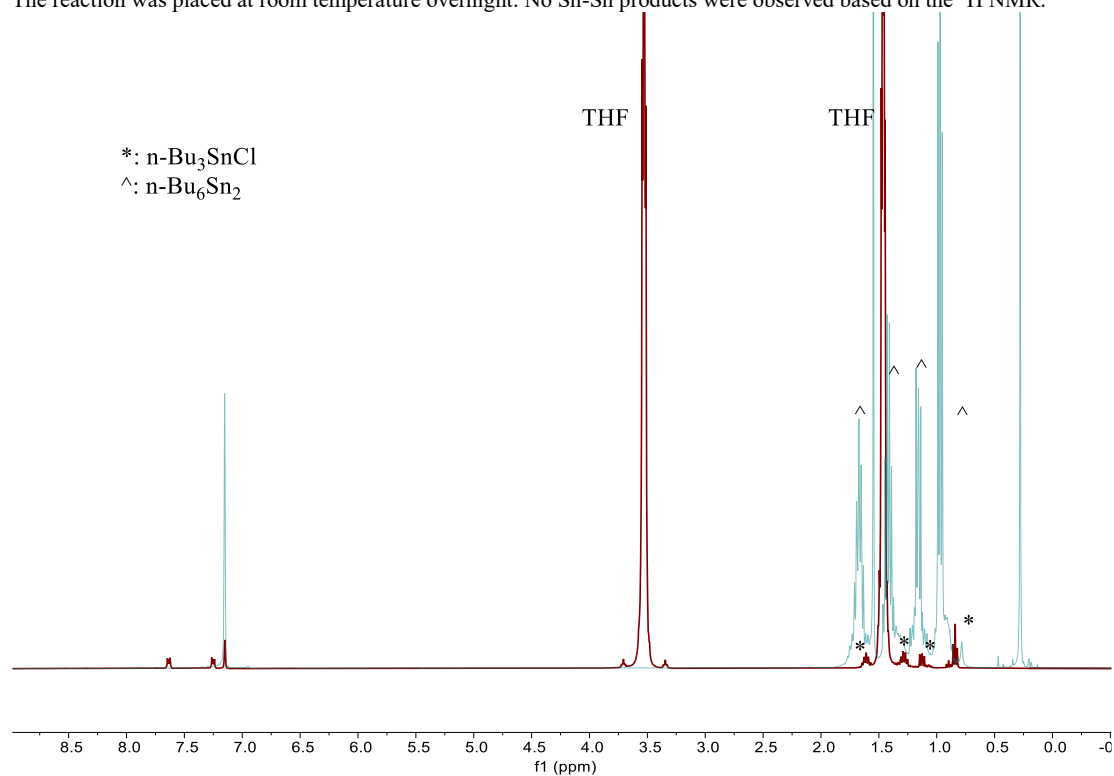

**Supplementary Figure 45.**  $^1\text{H}$  NMR in  $\text{C}_6\text{D}_6$  for comparison (Sn-Sn). (Red:  $n\text{Bu}_3\text{SnCl} + \text{NaNap.}$ ; Green:  $n\text{Bu}_6\text{Sn}_2$ ).

**Se-Se coupling reactions:**

To the  $C_6D_6$  solution of PhSeCl (3.8 mg, 0.02 mmol, 1.0 eq.) in J. Young's tube was added 200  $\mu$ L 0.1M Sodium naphthalene (0.02 mmol, 1.0eq.). The reaction was placed at room temperature overnight. No generation of Se-Se compounds was observed based on the  $^1H$  NMR.

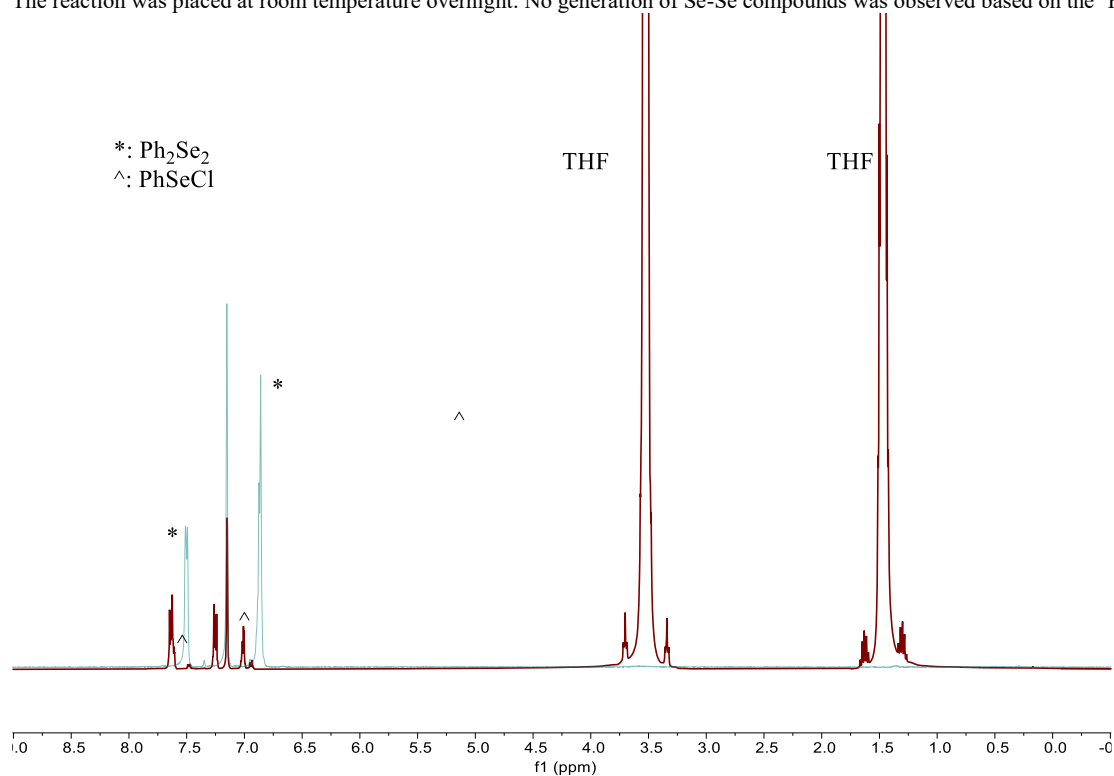

**Supplementary Figure 46.**  $^1H$  NMR in  $C_6D_6$  for comparison (Ge-Ge). (Red: PhSeCl+ NaNap.; Green:  $Ph_2Se_2$ ).

**Ge-Ge coupling reactions:**

To the  $\text{C}_6\text{D}_6$  solution of  $\text{Et}_3\text{GeCl}$  (3.9 mg, 0.02 mmol, 1.0 eq.) in J. Young's tube was added 200  $\mu\text{L}$  0.1M Sodium naphthalene (0.02 mmol, 1.0eq.). The reaction was placed at room temperature overnight. No generation of Ge-Ge compounds was observed based on the  $^1\text{H}$  NMR.

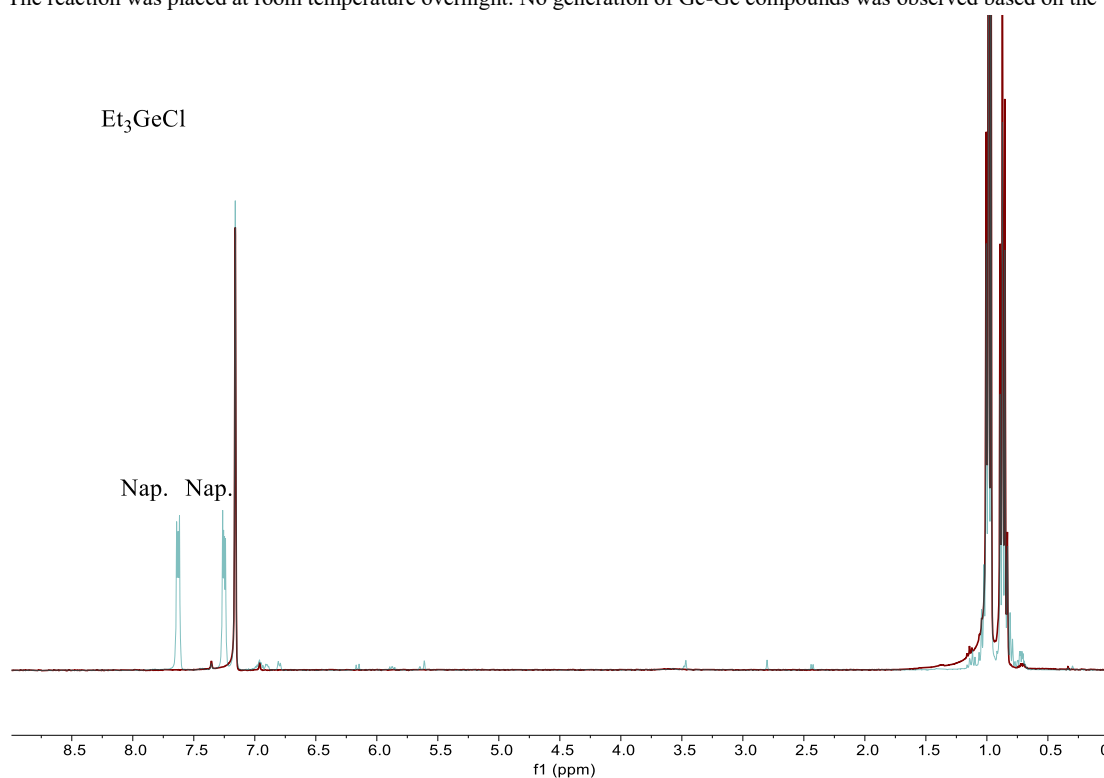

**Supplementary Figure 47.**  $^1\text{H}$  NMR in  $\text{C}_6\text{D}_6$  for comparison (Ge-Ge). (Red:  $\text{Et}_3\text{GeCl}$ ; Green:  $\text{Et}_3\text{GeCl}$ + NaNap., removal of solvent).

**P-P coupling reactions:**

To the C<sub>6</sub>D<sub>6</sub> solution of Ph<sub>2</sub>PCl (4.4 mg, 0.02 mmol, 1.0 eq.) in J. Young's tube was added 200 uL 0.1M Sodium naphthalene (0.02 mmol, 1.0eq.). The reaction was placed at room temperature overnight. About 21% of P-P compounds were generated based on the <sup>31</sup>P NMR.

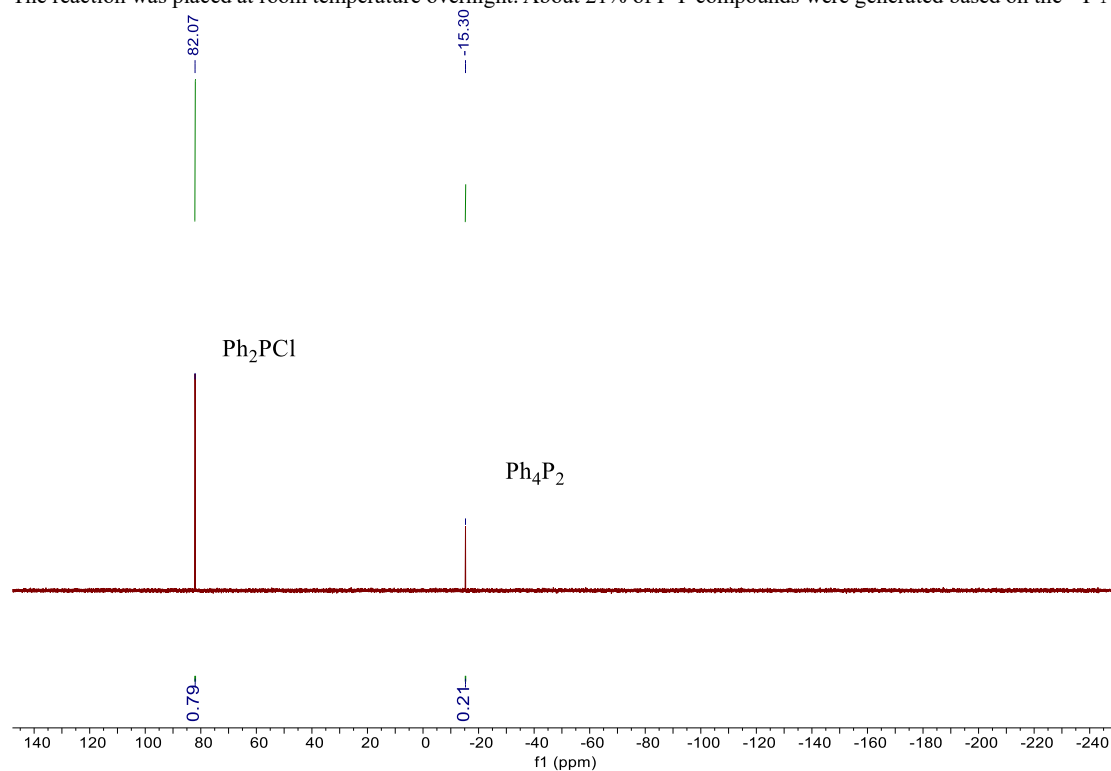

**Supplementary Figure 48.** <sup>31</sup>P{<sup>1</sup>H} NMR in C<sub>6</sub>D<sub>6</sub> for comparison (P-P).

**Reductive Pyridine couplings:**

To 0.1M Sodium naphthalene (0.63 mmol, 1.0 eq.), pyridine (50 mg, 0.63 mmol, 1.0 eq.) was added. After stirring at room temperature overnight. drops of MeOH were added to quench the reaction. No 4,4'-bipyridine was observed based on TLC (EA: DCM=2:1, 1%NEt<sub>3</sub>).

**The reduction of acridine:**

To 0.1M Sodium naphthalene (0.28 mmol, 1.0 eq.), acridine (50 mg, 0.28 mmol, 1.0 eq.) was added. After stirring at room temperature overnight. drops of MeOH were added to quench the reaction. The reduction product was not observed on TLC (EA: Hex=1:5).

## References

- [1] Fulmer, G. R., Miller, A. J. M., Sherden, N. H., Gottlieb, H. E., Nudelman, A., Stoltz, B. M., Bercaw, J. E., Goldberg, K. I. NMR Chemical Shifts of Trace Impurities: Common Laboratory Solvents, Organics, and Gases in Deuterated Solvents Relevant to the Organometallic Chemist. *Organometallics* **29**, 2176-2179 (2010).
- [2] Dodds, D. L., Haddow, M. F., Orpen, A. G., Pringle, P. G., Woodward, G. Stereospecific Diphosphination of Activated Acetylenes: A General Route to Backbone-Functionalized, Chelating 1,2-Diphosphinoethenes *Organometallics* **25**, 5937-5945 (2006).
- [3] Elangovan, S., Irran, E., Klare, H. F. T., Oestreich, M. Cationic Cobalt-Thiolate Complexes for the Dehydrogenative Coupling of *n*Bu<sub>3</sub>SnH. *Organometallics* **41**, 852-857 (2022).
- [4] Leng, T., Wu, G., Zhou, Y. B., Gao, W., Ding, J., Huang, X., Liu, M., Wu, H. Silver-Catalyzed One-Pot Three-Component Selective Synthesis of  $\beta$ -Hydroxy Selenides. *Adv. Synth. Catal.* **360**, 4336-4340 (2018).
- [5] Guan, W., Lu, L., Jiang, Q., Gittens, A. F., Wang, Y., Novaes, L. F. T., Klausen, R. S., Lin, S. An Electrochemical Strategy to Synthesize Disilanes and Oligosilanes from Chlorosilanes. *Angew. Chem. Int. Ed.* **62**, e202303592 (2023).
- [6] Davison, N., Quirk, J. A., Tuna, F., Collison, D., McMullin, C. L., Michaels, H., Morritt, G. H., Waddell, P. G., Gould, J. A., Freitag, M., Dawson, J. A., Lu, E. A room-temperature-stable electride and its reactivity: Reductive benzene/pyridine couplings and solvent-free Birch reductions. *Chem* **9**, 576-591 (2023).
- [7] Stoll, S., Schweiger, A. EasySpin, a comprehensive software package for spectral simulation and analysis in EPR. *J. Magn. Reson.* **178**, 42-55 (2006).
- [8] Trivedi, M. K., Tallapragada, R. M., Branton, A., Trivedi, D., Nayak, G., Latiyal, O., Jana, S. Physical, Atomic and Thermal Properties of Biofield Treated Lithium Powder. *J. Adv. Chem. Eng.* **5**, hal-01491589 (2015).
- [9] a) Neese, F. The ORCA program system. *Wiley Interdiscip. Rev.: Comput. Mol.* **2**, 73-78 (2011); b) Neese, F. Software update: The ORCA program system—Version 5.0. *Wiley Interdiscip. Rev.: Comput. Mol.* **12**, e1606 (2022).
- [10] Zhao, Y. & Truhlar, D. G. The M06 suite of density functionals for main group thermochemistry, thermochemical kinetics, noncovalent interactions, excited states, and transition elements: two new functionals and systematic testing of four M06-class functionals and 12 other functionals. *Theor. Chem. Acc.* **120**, 215-241 (2008).
- [11] Weigend, F. & Ahlrichs, R. Balanced basis sets of split valence, triple zeta valence and quadruple zeta valence quality for H to Rn: Design and assessment of accuracy. *Phys. Chem. Chem. Phys.* **7**, 3297-3305 (2005).
- [12] Barone, V. & Cossi, M. Quantum Calculation of Molecular Energies and Energy Gradients in Solution by a Conductor Solvent Model. *J. Phys. Chem. A* **102**, 1995-2001 (1998).
- [13] Perdew, J. P., Ruzsinszky, A., Csonka, G. I., Constantin, L. A., Sun, J. Workhorse Semilocal Density Functional for Condensed Matter Physics and Quantum Chemistry. *Phys. Rev. Lett.* **103**, 026403 (2009).
- [14] Jensen, F. Segmented Contracted Basis Sets Optimized for Nuclear Magnetic Shielding. *J. Chem. Theory Comput.* **11**, 132-138 (2015).
- [15] Marenich, A. V., Cramer, C. J., Truhlar, D. G. Universal Solvation Model Based on Solute Electron Density and on a Continuum Model of the Solvent Defined by the Bulk Dielectric Constant and Atomic Surface Tensions. *J. Phys. Chem. B* **113**, 6378-6396 (2009).
- [16] Geuenich, D., Hess, K., Köhler, K., Herges, R. Anisotropy of the Induced Current Density (ACID), a General Method To Quantify and Visualize Electronic Delocalization. *Chem. Rev.* **105**, 3758-3772 (2005).
- [17] Cox, J. D., Wagman, D. D., and Medvedev, V. A., CODATA Key Values for Thermodynamics, Hemisphere Publishing Corp., New York, 1989.
- [18] (a) Santra, G., Sylvetsky, N., Martin, J. M. L., Minimally Empirical Double-Hybrid Functionals Trained against the GMTKN55 Database: revDSD-PBEP86-D4, revDOD-PBE-D4, and DOD-SCAN-D4. *J. Phys. Chem. A* **123**, 5129-5143 (2019) (b) Caldeweyher, E., Bannwarth, C., Grimme, S. Extension of the D3 dispersion coefficient model. *J. Chem. Phys.* **147**, 034112 (2017). (c) Caldeweyher, E., Ehlert, S., Hansen, A., Neugebauer, H., Spicher, S., Bannwarth, C., Grimme, S. A generally applicable atomic-charge dependent London dispersion correction. *J. Chem. Phys.* **150**, 154122 (2019).
